# Supplementary material for: Biophysical and physiological processes causing oxygen loss from coral reefs
Source: eLife. 2019 Dec 3;8:e49114. doi: 10.7554/eLife.49114 (PMC6890468; doi:10.7554/eLife.49114)
Supplement: Figure 1—source data 1. [file elife-49114-fig1-data1.csv]

Sample	Reads	Oceanic Region	Island	Biomass ug/l	Latitude	Longitude	CCA	CORAL	MA	TURF	Calcifying	Fleshy		Anaplerosis	%Pyruvate carboxylase	%PEP carboxylase	%PEP carboxykinase	%Glutamate dehydrogenase	%Aspartate aminotransferase	Entner-Doudoroff	%KGPD alsolase	PPP	%6-phosphogluconate dehydrogenase	EMP	% PFK	PPP and ED	%Glucose-6-phosphate dehydrogenase	%Glucose dehydrogenase	Oxidative Kebs	%Pyruvate dehydrogenase complex	%Oxoglutarate dehydrogenase complex	%Isocitrate dehydrogenase	Glyoxylate Cycle	%Isocitrate lyase	% Malate synthase	Oxidative Stress	% SOD	% GSR	Control	rpoB%	Fleshy		Prochlorococcus marinus	Alteromonas macleodii ATCC 27126, complete genome	Fibrisoma limi BUZ 3 plasmid pFLIM01 complete sequence	Mesoflavibacter zeaxanthinifaciens DSM 18436 H574DRAFT_scaffold00001.1_C, whole genome shotgun sequence	Alteromonas australica strain H 17, complete genome	Psychrobacter pacificensis strain DSM 23406, whole genome shotgun sequence	Erythrobacter citreus LAMA 915 Contig01, whole genome shotgun sequence
ALA205	704472	Pacific	Marianas	41.88	17.61	145.817	0.7	53	4.7	36	53.67	40.67			0.000499665	0.000645874	0.000262608	0.000201569	0.001074564		8.38E-05		0.000418753		0.001230709		0.000329325	0.012386385		0.001446473	0.000645874	0.000719688		0.013956	0.019365		0.015701052	0.000222862		0.091327786	40.67		129970.5969	2207.800873	739.4715749	135.53728	2409.909861	1250.835749	380.4453576
ASC04	293695	Pacific	Marianas	82.09	19.708	145.403	3	12.5	6.5	47	15.5	53.5			0.000391563	0.000599261	0.000214508	0.000119171	0.001031683		6.81E-05		0.000422207		0.001161068		0.000343894	0.007454739		0.001215547	0.000585642	0.000783125		0.010011	0.021086		0.014696486	0.000234938		0.095633653	53.5		151458.3304	1095.263129	924.7985518	23.22190871	294.1422318	8.996459515	26.70895286
ASC324	128876	Pacific	Marianas	40.85	19.684	145.388	22.5	32.5	1.5	41	55	42.5			0.000349173	0.000372451	0.000209504	9.31E-05	0.000729383		5.43E-05		0.00038797		0.000962165		0.000341413	0.005516557		0.001016481	0.000457804	0.000574195		0.007355	0.017929		0.015170531	0.000178466		0.07539294	42.5		121674.0416	296.8205222	724.4599017	74.08844059	145.721642	10.25099777	30.43346282
BAK02	87581	Pacific	Remote	35.19	0.188	-176.48	20	55	0	25	75	25			0.000353958	0.00028545	0.000125598	0.000205524	0.000719334		5.71E-05		0.000262614		0.000822096		0.000148434	0.012154442		0.001450086	0.00062799	0.000525228		0.008778	0.017556		0.017556417	0.000148434		0.078328629	25		3889.863633	29.77999713	48.45669842	62.29806445	0	15.08440859	0
BAK09	67996	Pacific	Remote	18.9	0.187	-176.47	32.5	32.5	20	14	65	34			0.000514736	0.000529443	0.000264721	0.000279428	0.001073593		8.82E-05		0.000426496		0.001323607		0.000220601	0.015760703		0.001970704	0.000808871	0.000823578		0.010784	0.023226		0.018249235	0.000161774		0.090416663	34		5652.470237	1623.80417	39.00860073	100.3023484	27.61930458	58.28758701	19.22732197
BAK11	204636	Pacific	Remote	39.41	0.199	-176.485	17.5	22.5	7.5	52.5	40	60			0.000400712	0.000434919	0.000366504	0.000263883	0.001016439		0.000107508		0.000405598		0.001138607		0.000219903	0.016462612		0.001426924	0.000576634	0.000674368		0.014633	0.015548		0.018596654	0.000161262		0.083837374	60		19457.00119	157.1929204	134.8015974	33.3282437	0	51.64712323	57.49931031
BAK16	95070	Pacific	Remote	39.17	0.195	-176.463	15	65	2.5	17.5	80	20			0.000431261	0.000473335	0.000231408	0.000315557	0.001030819		6.31E-05		0.000378668		0.001430525		0.00029452	0.018252616		0.001661933	0.000873041	0.000767855		0.012168	0.017036		0.017644196	0.000252446		0.099780969	20		6086.249407	210.3282646	22.31979649	0	9.876944536	0	0
CSA002	17769312	Caribbean	Curacao	50.4	11.99	-68.64	13.9	27.4	19.7	25.4	41.29	45.13			0.000470643	0.000469405	0.000239795	0.000198038	0.001089856		0.000100679		0.000337998		0.001193743		0.000277501	0.019803806		0.001382102	0.000622084	0.000641612		0.021295	0.029624		0.021154449	0.000198038		0.131141825	45.13		91156.85083	264.0554294	513.0715429	48.36090268	45.65719624	2.007388068	21.04251204
CSA006	10653468	Caribbean	Curacao	35.02	11.989	-68.646	5	8.8	13.3	27.1	13.84	40.44			0.000426152	0.000520957	0.000222651	0.000168771	0.001025488		0.000106163		0.000309383		0.001109404		0.000282162	0.016877133		0.001209841	0.000537008	0.000590512		0.017422	0.02449		0.019007895	0.000199559		0.120880825	40.44		113263.1515	464.7463838	754.7873796	50.190269	17.45180266	2.604152879	9.57206769
CSA014	11245197	Caribbean	Curacao	95.39	12.275	-69.141	7.4	11.3	12.5	63.5	18.67	76.07			0.000394213	0.000512752	0.000228542	0.000153755	0.000899139		9.03E-05		0.000294881		0.001025949		0.000367268	0.015375453		0.000965923	0.000416356	0.000571177		0.014477	0.019475		0.018834708	0.000219916		0.10857969	76.07		141668.7756	129.7293329	788.8508249	11.40211055	3.423599053	1.174819426	2.092703021
CSA033	12034281	Caribbean	Curacao	166.82	12.359	-69.155	5.4	14.3	7.9	69.1	19.72	76.95			0.000409995	0.000575938	0.00021364	0.000149988	0.000980449		0.000104784		0.000310613		0.001070359		0.000368614	0.014998819		0.001074431	0.000467332	0.000590895		0.01401	0.020151		0.018937567	0.000214969		0.111124213	76.95		152623.7899	606.8375336	946.9527229	14.16818852	11.00183364	1.427122954	24.11765013
CSA035	14072146	Caribbean	Curacao	119.86	12.379	-69.162	5.8	23.8	10.6	57.7	29.67	68.34			0.000414862	0.000485001	0.000301375	0.000790214	0.000970357		0.000132389		0.000370732		0.001306055		0.000244881	0.079021352		0.001404334	0.000696127	0.000689589		0.031715	0.028809		0.037400124	0.000376275		0.096495588	68.34		13557.27009	361383.2934	78.29786088	18.8046762	5366.970954	136.7846636	517.5770254
CSA133	15869813	Caribbean	Curacao	186.65	12.094	-68.785	2.6	5	37.9	47.1	7.62	85.05			0.000472847	0.000456842	0.000265599	0.000211912	0.001127928		9.74E-05		0.000348019		0.001251874		0.000215566	0.021191176		0.00155402	0.000708011	0.000646763		0.025596	0.034222		0.021424323	0.000166606		0.147052772	85.05		68289.77082	940.7243097	399.222818	91.53817729	46.32933448	18.56398637	28.00975253
CSA139	12757004	Caribbean	Curacao	206.51	12.065	-68.761	3.2	12.7	9.5	68.7	15.9	78.22			0.00035361	0.000384651	0.000210394	0.000171357	0.000871756		8.43E-05		0.000262601		0.000948655		0.00023932	0.017135685		0.001092733	0.000501607	0.000503802		0.01603	0.022976		0.015991215	0.000156071		0.102923853	78.22		74305.35469	397.3815013	468.6503625	36.88882868	22.74447395	41.32019774	10.45330553
CSA142	16396479	Caribbean	Curacao	130.86	12.053	-68.746	5.2	36.5	9.5	33	41.64	42.57			0.00034916	0.000456683	0.000209984	0.000157046	0.000957523		9.25E-05		0.000290245		0.001023573		0.000255177	0.015704591		0.001170129	0.000533895	0.000535542		0.015949	0.023993		0.017406176	0.000176562		0.111078726	42.57		96058.22127	360.2899603	614.3956053	22.12867964	7.731242226	6.123520589	11.4819079
CSA150	11699778	Caribbean	Curacao	93.13	12.043	-68.768	2	29	16	41.8	31.09	57.75			0.000431718	0.000424367	0.000245047	0.000209235	0.001073012		9.24E-05		0.000308809		0.001165578		0.000241116	0.020923474		0.001418488	0.000659329	0.000596507		0.021368	0.029129		0.020769625	0.000183593		0.128096448	57.75		68464.33051	7745.942063	395.74082	464.2459209	822.4842768	34.3268656	84.81376037
CSA155	6609339	Caribbean	Curacao	84.77	12.035	-68.795	1.9	29.3	8.6	41.4	31.24	50			0.000300938	0.000366905	0.000182772	0.000140861	0.000780713		9.20E-05		0.00024768		0.000850312		0.000226649	0.014086129		0.000947296	0.000428787	0.000456778		0.014298	0.019094		0.014585422	0.000162951		0.093988219	50		77185.66313	1961.249799	516.97436	145.2911273	55.26595542	45.97354522	26.90190562
CSA162	10699056	Caribbean	Curacao	184.49	12.051	-68.834	0.8	13.1	3.7	56.2	13.9	59.87			0.000526121	0.000490604	0.000260584	0.000268528	0.001206929		0.00010786		0.000359284		0.001330865		0.00026049	0.026852836		0.001601543	0.000710156	0.000698847		0.025937	0.034704		0.023974078	0.00023675		0.145405352	59.87		64970.53138	1829.693578	374.9923195	215.5870198	527.3790241	47.04545815	1352.831024
CSA167	13075487	Caribbean	Curacao	225.43	12.064	-68.859	1.4	25.4	5.6	49.9	26.79	55.48			0.000537494	0.000498643	0.000270659	0.000234867	0.001204926		0.000104011		0.00036251		0.001329817		0.000263547	0.023486697		0.001563078	0.000703148	0.000668426		0.024382	0.033765		0.023769669	0.000213529		0.144751779	55.48		69446.34447	877.3337123	395.5673842	177.4479157	162.2274966	36.37330923	45.79412538
CSA172	6273372	Caribbean	Curacao	49.25	12.07	-68.873	3.1	27.5	11.2	36.3	30.55	47.43			0.00041987	0.000468807	0.000209935	0.000180923	0.000977146		8.64E-05		0.000288362		0.00110722		0.000259988	0.018092343		0.00114723	0.000518382	0.000564768		0.017742	0.022731		0.01959074	0.000184271		0.111582734	47.43		87368.70303	1186.692505	586.9413899	73.05714531	21.25462329	16.21540765	12.08729486
CSA182	8673994	Caribbean	Curacao	169.21	12.09	-68.905	2.5	15.6	5.5	63.1	18.09	68.65			0.000462417	0.000416648	0.000258358	0.000219737	0.001013143		9.06E-05		0.000295596		0.001151603		0.000267236	0.02197373		0.00124683	0.000580932	0.000582892		0.018158	0.026435		0.020970732	0.000193452		0.119080092	68.65		79195.50857	662.214195	434.0396662	53.78131919	22.08397053	4.721508367	19.44342446
CSA191	14344560	Caribbean	Curacao	150.88	12.105	-68.942	4.6	3.7	8.5	76.1	8.3	84.58			0.000476696	0.0004127	0.000275157	0.000263933	0.001008954		9.38E-05		0.000295164		0.001175289		0.000256752	0.026393281		0.001294707	0.000596463	0.000618492		0.01922	0.025961		0.020446776	0.000213391		0.122583056	84.58		73949.39087	703.3495435	403.8028386	50.30288604	159.9852997	2.486650333	19.68650783
CSA195	11429603	Caribbean	Curacao	113.73	12.109	-68.953	1.5	26.8	10.8	45.3	28.34	56.12			0.000385228	0.000431774	0.000205694	0.000162648	0.000889882		8.65E-05		0.000270788		0.001018058		0.000252065	0.016264782		0.001083852	0.000487506	0.00052959		0.016247	0.021366		0.016649747	0.000178834		0.107519045	56.12		96698.2792	272.9195114	625.6050713	20.04945621	6.408104212	4.623459235	8.57891336
CSA215	12242450	Caribbean	Curacao	75.82	12.19	-69.023	0	5.2	10.9	83.3	5.19	94.12			0.000521138	0.000539026	0.000283032	0.00030868	0.001191592		0.000124403		0.000344539		0.00129198		0.000304106	0.030868004		0.001420631	0.00060862	0.000671026		0.023517	0.029765		0.025583114	0.000249133		0.136868029	94.12		103718.3468	27011.15914	588.2707072	31143.50278	4870.17018	108.0199385	59.69605517
CSA222	15132097	Caribbean	Curacao	139.18	12.189	-69.056	2.5	32.1	25.4	29.8	34.51	55.18			0.000485789	0.00058333	0.000273789	0.000209555	0.001170294		0.00011241		0.000343773		0.001278078		0.000322031	0.020955456		0.001406216	0.000639435	0.000673733		0.020129	0.030095		0.022561315	0.000232882		0.14027798	55.18		120051.6113	1892.508221	757.1608555	15.59449978	37.10805369	12.74652865	38.4470532
CSA226	22225638	Caribbean	Curacao	208.46	12.196	-69.078	1.1	17.9	21.4	41.9	18.96	63.3			0.000430674	0.000494339	0.00029007	0.000645021	0.000949939		0.00012787		0.000306943		0.001288827		0.000286066	0.064502085		0.001311683	0.000633143	0.000671702		0.028854	0.029219		0.033938283	0.000385591		0.099700175	63.3		45002.38008	299407.7295	247.4653997	310.1740517	4147.540766	995.0373993	223.7630824
CSA229	30844200	Caribbean	Curacao	58.7	12.212	-69.085	2.9	14.8	9.7	65.6	17.67	75.25			0.000513289	0.000689335	0.000277037	0.000291627	0.001256768		0.000122778		0.00044741		0.001428826		0.000450133	0.029162695		0.001495581	0.000651662	0.000761602		0.023106	0.029944		0.02952581	0.000324016		0.14795002	75.25		150861.5536	75086.57047	836.8116145	4.201211608	1107.285928	27.79773264	43.61581865
CSA232	14727622	Caribbean	Curacao	217.71	12.225	-69.093	2.2	9	17.8	65.6	11.12	83.36			0.000412083	0.000598399	0.000221624	0.000145169	0.000966823		0.000109862		0.000302968		0.001073154		0.00036788	0.01451694		0.001057401	0.000450786	0.000588147		0.01379	0.020207		0.019086584	0.000252043		0.114349757	83.36		162279.38	101.1202257	1002.430588	3.797306824	2.486555098	0.358810835	1.686642875
CSA235	12947146	Caribbean	Curacao	132.37	12.235	-69.103	3.2	14.1	21.5	57.9	17.37	79.4			0.000489451	0.000621681	0.000257045	0.000198422	0.001207139		0.000107591		0.000394527		0.001291327		0.000400011	0.019842211		0.001386097	0.000618746	0.000704789		0.021959	0.029103		0.024314239	0.000257895		0.13940524	79.4		141467.8658	16809.26333	776.9334677	10.53538514	318.3879215	42.14190789	98.95874854
FDP221	667115	Pacific	Marianas	88.02	20.55	144.886	3.5	7.5	0.5	76	11	76.5			0.000412223	0.000592102	0.000250332	0.000158893	0.000939868		9.89E-05		0.000380744		0.001092765		0.000350764	0.009840217		0.00124866	0.000512655	0.00069853		0.01179	0.01671		0.015502984	0.000233843		0.081135375	76.5		144185.5601	1503.898061	917.6537337	239.2266827	981.065901	95.05582134	143.0620087
GUG230	95279	Pacific	Marianas	67.47	17.301	145.833	20	2	1	73	22	74			0.000377838	0.000577252	0.000220405	0.000199414	0.000986576		7.35E-05		0.00041982		0.001123018		0.000388333	0.012123764		0.001227973	0.000598243	0.00062973		0.0134	0.017867		0.018504693	0.000230901		0.084228259	74		156976.0567	5000.306947	901.9688873	472.4340721	1133.357072	623.9553468	425.3698143
HAW1648	42689	Pacific	Hawaii	181.98	19.414	-154.902	5	20	5	60	25	65			0.000327953	0.000609056	0.000187402	0.000210827	0.001100986		0.000210827		0.000562206		0.001335239		0.00053878	0.011770399		0.00152264	0.000585631	0.00103071		0.013078	0.028772		0.017001687	0.000234252		0.098086656	65		136420.8552	1690.345211	932.0066581	31.95276759	87.98529991	587.9979429	0
HAW1693	93681	Pacific	Hawaii	102.13	19.077	-155.553	17	27.5	3	47.5	44.5	50.5			0.000416306	0.000629797	0.000245514	0.000202816	0.001195547		8.54E-05		0.000437655		0.001334315		0.000459004	0.011584024		0.001686575	0.00066182	0.000811264		0.013413	0.02012		0.018290564	0.000266863		0.08596565	50.5		121443.7979	844.5068388	809.7636032	0	20.04677826	98.71535445	0
HAW1743	71806	Pacific	Hawaii	83.4	20.003	-155.833	1.5	15	3	69.5	16.5	72.5			0.000403866	0.000710247	0.000459572	0.000236749	0.00108626		5.57E-05		0.00038994		0.001657243		0.000376013	0.013480723		0.001531905	0.000612762	0.000779879		0.011102	0.017446		0.021410559	0.000208896		0.100708927	72.5		123671.7357	1053.347853	834.8173025	18.99606851	26.15383442	128.7880278	0
HOW04	217406	Pacific	Remote	49.18	0.795	-176.619	25	50	7.5	12.5	75	20			0.000381774	0.000423171	0.000234584	0.00029438	0.001016531		5.98E-05		0.000335777		0.001076327		0.000110393	0.017494321		0.001637489	0.000731351	0.000685354		0.013941	0.019134		0.018861065	0.000165589		0.084464769	20		3320.94625	9061.533	14.64041737	62.7412167	341.2099401	78.99689361	12.02709203
HOW05	270684	Pacific	Remote	43.68	0.804	-176.621	40	35	5	10	75	15			0.000384212	0.000247521	0.000317714	0.000387906	0.00070562		3.69E-05		0.000225355		0.001137858		4.80E-05	0.02290451		0.001256077	0.000572623	0.000605873		0.013088	0.014833		0.013088291	0.000144079		0.079184163	15		753.2970161	7213.739627	3.919594531	35.27442283	211.6086216	175.7025653	9.659832018
HOW12	158546	Pacific	Remote	39.35	0.812	-176.622	37.5	32.5	7.5	20	70	27.5			0.000391054	0.000409976	0.000233371	0.000271215	0.000901946		0.000100917		0.000327981		0.001072244		0.00016399	0.01593224		0.001475912	0.00070642	0.000548737		0.018896	0.019267		0.008892413	0.000132454		0.075956027	27.5		3056.740244	4304.549077	36.80536496	34.4135253	148.0644603	49.99587206	0
HOW14	156246	Pacific	Remote	62.36	0.815	-176.624	7.5	35	5	38.5	42.5	43.5			0.000486412	0.000422411	0.000352009	0.000320008	0.000947224		5.76E-05		0.00039681		0.001280033		0.000102403	0.018551912		0.001721644	0.000620816	0.000684818		0.015584	0.019665		0.016325683	0.000115203		0.089420216	43.5		2793.003543	1758.293907	16.975979	209.5206322	162.263547	67.64244019	25.10235753
JAR02	231059	Pacific	Remote	95.71	-0.382	-160.009	15	7.5	15	62.5	22.5	77.5			0.000450101	0.00032892	0.000302953	0.000289969	0.000982433		6.92E-05		0.000302953		0.001164205		0.000116853	0.017782024		0.001432535	0.000588594	0.000584266		0.01327	0.019374		0.018843638	0.000129837		0.086786894	77.5		766.6040387	515.4789963	2.295888769	70.84069588	97.53364642	331.6219673	50.92391495
JAR03	77035	Pacific	Remote	33.78	-0.362	-160.001	10	42.5	12.5	26.5	52.5	39			0.000506263	0.000519244	0.000285584	0.000363471	0.001064451		3.89E-05		0.000402414		0.001064451		7.79E-05	0.020345436		0.001674564	0.000843772	0.000791848		0.011626	0.018892		0.011625964	0.000142792		0.094460955	24.5		1167.050389	758.3580706	17.13842804	132.2035049	60.67270488	0	295.6633249
JAR07	146782	Pacific	Remote	84.35	-0.376	-160.014	42.5	15	20	22.5	57.5	42.5			0.000354267	0.000395144	0.000333828	0.000320203	0.001021924		6.81E-05		0.000299764		0.001164993		6.13E-05	0.019379525		0.001505634	0.000660844	0.000633593		0.011545	0.013195		0.018967195	9.54E-05		0.08906335	42.5		605.1715579	183.612477	0	27.87872551	51.17799823	153.0080596	124.6974002
JAR10	46846	Pacific	Remote	121.2	-0.381	-159.973	35	47.5	10	7	82.5	17			0.000298852	0.00061905	0.000192119	0.000213465	0.001259446		8.54E-05		0.000341545		0.001451565		0.000234812	0.012302544		0.001451565	0.000725782	0.00055501		0.014763	0.024605		0.023374834	0.000234812		0.079966537	17		2148.507591	2189.892467	0	116.4694271	80.17769859	84.60322687	195.3564209
JAR11	51558	Pacific	Remote	36.62	-0.37	-160.009	47.5	7.5	15	30	55	45			0.000368517	0.000659451	0.000271539	0.000155165	0.001086155		7.76E-05		0.000387913		0.001260716		0.000426704	0.008720106		0.001357694	0.000562473	0.000872803		0.02507	0.02289		0.018530226	0.000290934		0.077390944	45		72624.44166	354.1086446	452.7206946	0	0	102.494867	0
JAR12	101386	Pacific	Remote	49.96	-0.382	-159.984	25	30	12.5	32.5	55	45			0.000522755	0.000720021	0.000276172	0.000266309	0.001124416		0.000128223		0.000641114		0.001370998		0.000473438	0.014840302		0.001686623	0.000700294	0.000917286		0.020886	0.020886		0.018687788	0.000226856		0.082446121	45		113681.0676	29558.10522	680.2038663	0	509.3904625	0	38.68525196
KAU1246	214004	Pacific	Hawaii	222.55	21.962	-159.328									0.000439244	0.000528028	0.000271023	0.000252332	0.000873815		7.48E-05		0.00038317		0.001168202		0.000280369	0.014699037		0.001336424	0.000518682	0.000621484		0.014699	0.017965		0.013882424	0.000210276		0.066417872			1309.217273	271.0549364	0	0	0	43.35693831	0
KAU1263	100915	Pacific	Hawaii	164.03	21.912	-159.652	0.5	4.5	29	53.5	5	82.5			0.000455829	0.000574741	0.00029728	0.000218005	0.001090026		0.000109003		0.000307189		0.001298122		0.000247733	0.013254769		0.001456671	0.000564832	0.000654016		0.01446	0.024702		0.013254769	0.000168459		0.092783381	82.5		114502.4872	947.6549973	783.2569855	81.09983822	27.91461478	196.3693587	64.77634569
KAU1363	150919	Pacific	Hawaii	98.09	22.169	-159.7	3	6.5	10	73	9.5	83			0.000430695	0.000503581	0.000159026	0.000192156	0.000861389		5.96E-05		0.000344556		0.000974032		0.000278295	0.012171322		0.001106554	0.000410816	0.000728868		0.012171	0.01469		0.016368329	0.000265043		0.076385537	83		73248.23859	201.6217695	400.7141379	27.11451234	6.221888013	17.5075052	17.3255983
KIN03	829072	Pacific	Remote	144.99	6.39	-162.361	2.5	17.5	12.5	59.5	20	72			0.000337727	0.000533126	0.000142328	0.00028948	0.000902214		7.36E-05		0.000319634		0.000954079		0.000396829	0.016813033		0.000970965	0.000312397	0.000524683		0.007356	0.009457		0.012889992	0.000236409		0.06213817	72		585.6133641	520.1190072	1.919564633	205.6563989	53.23186949	66.92605555	304.3457385
KIN05	72538	Pacific	Remote	175.02	6.393	-162.347	20	30	10	27	50	37			0.000358433	0.000303289	0.000206788	0.000372219	0.001089084		1.38E-05		0.000386005		0.001047727		0.000110287	0.020426073		0.00157159	0.000592793	0.000565221		0.012861	0.011348		0.015886945	0.000137859		0.060521697	37		529.6277118	1018.747709	0	112.8262452	51.77981841	54.63788312	270.3509164
KIN07	241997	Pacific	Remote	16.9	6.402	-162.385	22.5	27.5	20	24	50	44			0.000285128	0.000429757	0.000185953	0.000260334	0.000855383		5.79E-05		0.000347112		0.001033071		0.000157027	0.015169465		0.001309934	0.000495874	0.000566123		0.01228	0.01541		0.014206324	0.000152894		0.071753975	44		644.8780263	589.178869	13.15270263	90.18503176	38.80218007	65.51027932	264.7209191
KIN08	86979	Pacific	Remote	20.59	6.429	-162.383	22.5	22.5	5	20	45	25			0.000367905	0.000275929	0.000298923	0.000459881	0.000781798		4.60E-05		0.000287426		0.0011612		0.000160958	0.025962731		0.001264673	0.000597845	0.000494372		0.011683	0.018174		0.020121116	0.000241438		0.066204963	25		414.8909425	1239.425912	12.19801936	172.5054169	43.18288861	106.3216767	105.2169707
LAN1248	123840	Pacific	Hawaii	81.45	20.903	-156.873									0.000500646	0.000702519	0.000274548	0.000314922	0.000904393		0.000113049		0.000331072		0.001316214		0.000209948	0.017262366		0.001453488	0.000492571	0.000629845		0.015492	0.014164		0.012836118	0.000258398		0.089852827	39		73249.01943	2323.701546	466.9165711	506.66552	37.9118668	202.6893103	73.89911898
LAN1254	80741	Pacific	Hawaii	109.6	20.922	-156.914	6.5	26	27.5	37	32.5	64.5			0.000396329	0.000458255	0.000272476	0.000222935	0.001374766		0.000148623		0.000260091		0.001300455		0.000309632	0.012765505		0.001610087	0.000631649	0.000767887		0.018439	0.022694		0.014183894	0.00023532		0.104960817	64.5		45606.68308	646.0563849	282.519263	456.13574	23.25958601	81.81144578	64.76912523
MAI1488	443308	Pacific	Hawaii	88.16	20.864	-156.139	2.5	4	22.5	70	6.5	92.5			0.000331598	0.000509804	0.000171438	0.000200763	0.000979003		8.57E-05		0.000268436		0.001057955		0.000241367	0.013483561		0.00138053	0.000561686	0.000651917		0.012726	0.019089		0.016362075	0.000146625		0.084991887	92.5		77616.62883	774.6487482	543.2803748	92.30817145	27.53619272	736.0877187	35.38977826
MAU539	807728	Pacific	Hawaii	77.82	20.023	145.23	6	17.5	3.5	67.5	23.5	71			0.000459313	0.000560832	0.000259989	0.000159707	0.000999099		0.000118852		0.000411029		0.001131569		0.000357794	0.010110811		0.001265277	0.000531119	0.000654923		0.012697	0.018105		0.015440541	0.000210467		0.086921626	71		130433.0298	475.7408321	804.5345212	38.84070999	322.0184386	11.44909316	38.84617549
MAU541	424233	Pacific	Hawaii	127.05	20.03	145.21	1	3.5	0.5	85	4.5	85.5			0.000436081	0.000490297	0.000266363	0.000190933	0.001060738		9.66E-05		0.000412509		0.001211598		0.000306435	0.011327594		0.001225742	0.000549226	0.000667086		0.014964	0.020418		0.017201161	0.000190933		0.083768257	85.5		126886.657	760.2960916	926.5897523	128.6115598	1184.173786	133.9066652	61.63504419
MAU575	381074	Pacific	Hawaii	103.56	20.034	145.228	5.5	19.5	9	47.5	25	56.5			0.000362134	0.000564195	0.000270289	0.000115463	0.000944698		0.000120711		0.000370007		0.001110021		0.000330644	0.007286493		0.001178249	0.000532705	0.000687531		0.013911	0.017885		0.017222621	0.000212557		0.087106716	56.5		141389.7896	492.7852828	836.6405044	68.00936883	867.3601274	41.60160773	72.04637599
MAU577	191353	Pacific	Hawaii	68.1	20.026	145.237	4.5	15	2	62.5	19.5	64.5			0.000574854	0.000689825	0.000344912	0.00021949	0.001139256		9.41E-05		0.000350138		0.001316938		0.000350138	0.013402003		0.001337842	0.000491239	0.000742084		0.015636	0.023613		0.019464813	0.000318783		0.088389398	64.5		127256.603	3798.256577	803.9637282	1995.938787	1182.627234	766.347757	922.3604175
MOL1435	236950	Pacific	Hawaii	173.89	21.175	-156.821	0.5	1	26.5	57	1.5	83.5			0.000510656	0.000514877	0.000248998	0.000211015	0.001093058		9.71E-05		0.00042625		0.00099177		0.000392488	0.012692063		0.001282971	0.000552859	0.000784976		0.013454	0.01523		0.013199745	0.000270099		0.081736883	83.5		143330.6824	1999.645848	935.8221099	178.4552968	59.44299116	167.2640965	27.58769751
MOL1462	123353	Pacific	Hawaii	56.2	21.083	-157.137	7.5	65	5	19	72.5	24			0.000575584	0.000397234	0.000267525	0.000186457	0.001086313		0.000105389		0.000348593		0.001045779		0.000267525	0.009999174		0.001524081	0.0007134	0.000843109		0.013477	0.019564		0.013042401	0.000137816		0.082601872	24		93304.86516	1085.386214	718.1918756	143.753391	22.83692615	107.0997534	31.79608891
MOL1509	318948	Pacific	Hawaii	77.55	21.14	-157.293	1.5	1	28	47	2.5	75			0.00045462	0.000379372	0.000260231	0.000310395	0.000975081		9.41E-05		0.000241419		0.001119305		0.000181848	0.019124633		0.001341912	0.00050792	0.000611385		0.011011	0.017		0.015067892	0.00020693		0.070316831	75		27813.51965	498.8207408	189.6088923	29.93660995	14.72028539	28.99454808	4.099041176
NII1227	43411	Pacific	Hawaii	388.78	22.002	-160.104	20	1.5	3.5	75	21.5	78.5			0.000552855	0.000806247	0.000207321	0.000184285	0.001036604		0.000115178		0.00052982		0.001520352		0.000414641	0.010137233		0.002211421	0.000921425	0.000760176		0.019007	0.02661		0.011404387	0.000276428		0.10517379	78.5		107011.9237	1982.662082	659.8841585	94.26401343	86.52195222	152.1627685	60.23270531
NII1303	78403	Pacific	Hawaii	264.81	21.851	-160.183	3.5	4	35	47.5	7.5	82.5			0.000408148	0.000612221	0.000267847	0.000306111	0.001428517		0.000114792		0.000548448		0.001300971		0.00033162	0.017127565		0.001581572	0.000548448	0.000943841		0.010705	0.022123		0.01926851	0.000229583		0.081355932	82.5		78854.93664	454.6366809	466.863738	17.39769774	0	168.5021732	16.67513979
OAH1537	140277	Pacific	Hawaii	420	21.62	-158.099	3	10	12.5	73	13	85.5			0.000463369	0.000577429	0.000335051	0.000256635	0.000862579		0.00011406		0.000292279		0.00119763		0.000270893	0.014462943		0.001511296	0.000506141	0.000762777		0.012856	0.017677		0.016069936	0.000220991		0.082358424	85.5		84350.94206	223.1152872	533.2199333	68.06690954	6.693906464	113.0141867	18.63999066
OFU01	102716	Pacific	American Samoa	161.77	-14.164	-169.656	39.1	9.5	21.1	13.4	48.59	34.56			0.000428366	0.00050625	0.000350481	0.000194712	0.001139063		9.74E-05		0.000457572		0.001353246		0.000369952	0.01127739		0.001888703	0.000720433	0.000700962		0.013533	0.023683		0.018607693	0.000311539		0.10149651	34.56		120797.9235	228.5277596	692.0547164	0	73.133776	25.72350147	50.91245707
OFU06	58471	Pacific	American Samoa	122.48	-14.174	-169.682	19.5	24	31	19	43.5	50			0.000495972	0.000598587	0.00034205	0.000222332	0.000940637		0.000171025		0.000461767		0.001197175		0.00041046	0.012727629		0.001607635	0.000666997	0.001009047		0.014686	0.03133		0.012727629	0.00020523		0.089093401	50		121401.4155	1278.707541	725.8104196	139.9700736	0	158.1596539	44.71895418
OFU09	172886	Pacific	American Samoa	91.06	-14.158	-169.674	30	20	5	45	50	50			0.000451164	0.0005842	0.000358618	0.000202446	0.001006444		0.000127251		0.000393323		0.001347709		0.000410675	0.011872416		0.001648485	0.000670962	0.000751941		0.012551	0.020353		0.016621382	0.000196661		0.092604842	50		115120.1368	311.7777795	619.8195582	0	27.15665574	38.20747743	113.4314796
OLO04	142338	Pacific	American Samoa	200.73	-14.182	-169.627	4	10	3	82.5	14	85.5			0.000555017	0.00059717	0.00026697	0.000182664	0.001138136		0.000105383		0.000519889		0.001341876		0.0003302	0.010955256		0.001686127	0.000737681	0.000807936		0.01559	0.027388		0.018118308	0.000231843		0.101546798	85.5		100974.6125	268.7479213	465.868007	28.74913998	13.1939625	27.84444608	0
PAL04	265801	Pacific	Remote	63.8	5.874	-162.117	22.5	6.5	14	44.5	29	58.5			0.000470277	0.000605716	0.000316026	0.000421368	0.001132426		6.02E-05		0.000237019		0.001196384		0.000154251	0.025062208		0.001741905	0.000759967	0.000729869		0.01723	0.02372		0.019467965	0.000285928		0.08615134	58.5		18.2310773	4366.545116	0	590.1544577	130.7107247	193.841242	491.8645848
PAL12	133825	Pacific	Remote	30.66	5.897	-162.108	10.7	18.8	8.9	18.2	29.49	27.1			0.000530544	0.000403512	0.000231646	0.000388567	0.001128339		2.99E-05		0.000381095		0.001188119		0.000186811	0.02344074		0.001561741	0.000650103	0.000605268		0.015327	0.025244		0.022539173	0.000186811		0.095566094	27.1		1616.48263	5742.861062	3.964025877	1182.347668	694.6468192	39.48761707	586.1599783
PAL19	316645	Pacific	Remote	22.05	5.866	-162.11	9.9	45.5	13.8	18.2	55.42	31.99			0.000404238	0.000312653	0.000287388	0.000296862	0.000855848		7.26E-05		0.000341076		0.001200082		0.000135799	0.017573378		0.001500103	0.000817951	0.000644255		0.012152	0.02206		0.018321182	9.47E-05		0.083567022	31.99		673.989323	2281.611439	8.376664135	1253.559107	1227.704409	33.37763334	346.8237387
ROS02	80660	Pacific	American Samoa	36.73	-14.552	-168.14	50	11.5	28.5	5	61.5	33.5			0.000421522	0.000607488	0.000297545	0.000285148	0.001041408		7.44E-05		0.000570295		0.001165386		0.000334738	0.017321494		0.001549715	0.000644681	0.000768659		0.023346	0.030877		0.01958082	0.000260352		0.118238027	33.5		81623.72102	129.3410329	690.5653994	169.1088142	23.28294364	16.37872041	81.04270921
ROS03	306663	Pacific	American Samoa	36.79	-14.555	-168.147	37.5	31.5	20	8.5	69	28.5			0.000492397	0.000570659	0.000280438	0.000231525	0.001030447		9.46E-05		0.000427179		0.00132719		0.000303264	0.014436		0.001571758	0.000694574	0.000782618		0.016266	0.020536		0.02012907	0.000202176		0.096782195	28.5		83941.08672	337.3641093	697.1358217	151.2314092	88.79790647	17.23204415	144.9504945
ROS07	216813	Pacific	American Samoa	45.97	-14.549	-168.168	2.5	1.5	2.5	61.5	4	64			0.000493513	0.000678004	0.000355145	0.00020294	0.001222251		0.000138368		0.000484288		0.00136062		0.000428941	0.012448614		0.001582008	0.000664167	0.000885556		0.011883	0.02518		0.018955844	0.000290573		0.102701066	64		91776.02951	1363.348532	645.9402408	106.9517918	190.5607558	30.46652158	90.4499028
ROS08	101104	Pacific	American Samoa	45.37	-14.538	-168.153	42.5	20	25	2.5	62.5	27.5			0.000454977	0.000316506	0.000306615	0.000356069	0.000771483		4.95E-05		0.000197816		0.000890172		0.000237379	0.022890279		0.000969299	0.000385741	0.000553885		0.006358	0.012717		0.014624345	0.000217598		0.070578361	27.5		21491.54804	137.5830526	178.3956712	13.49137221	102.1622516	0	25.86210209
SAI724	449734	Pacific	Marianas	66.53	15.198	145.783	3	35	10	48.5	38	58.5			0.000580343	0.000284613	0.000331307	0.000462496	0.000982803		9.78E-05		0.000171212		0.001113992		0.000235695	0.02720583		0.001378593	0.000506966	0.000684849		0.009417	0.011903		0.014256902	0.000306848		0.070238129	58.5		11540.71993	2283.008206	58.97772495	288.1325652	108.5709733	49.93802783	93.02430219
SWA1	147596	Pacific	Remote	188.58	-11.068	-171.081	6.5	35.9	37.3	11.9	42.45	49.2			0.000365864	0.000494593	0.000250684	0.000210033	0.000874007		8.13E-05		0.000291336		0.001090815		0.000216808	0.013576484		0.001185669	0.000609773	0.000697851		0.015766	0.017518		0.017955995	0.00014228		0.087590218	49.2		9542.456963	907.1089032	68.28931338	813.2658691	76.34362316	53.70501594	17.7156696
SWA3	170490	Pacific	Remote	117.87	-11.058	-171.091	7.2	47.7	26.8	12	54.9	38.77			0.00034089	0.00045452	0.00034089	0.000624964	0.000681779		5.68E-05		0.00022726		0.001704449		0.00034089	0.0382622		0.001193114	0.00056815	0.000852224		0.006957	0.02087		0.020870291	0.00011363		0.111308219	41.03		16541.88278	1664.244216	118.4743357	163.1955225	119.8336008	42.14933204	10.42784776
SWA16	17601	Pacific	Remote	178.01	-11.051	-171.092	11.2	40.7	29.1	11.9	51.96	41.03			0.000404716	0.000469236	0.000181829	0.000211156	0.000903279		4.69E-05		0.000404716		0.001243475		0.000269811	0.013038518		0.001407707	0.000633468	0.000586545		0.013401	0.019196		0.019195596	0.000164233		0.098151066	38.77		2953.423128	1784.77071	34.22689538	992.081238	77.10725343	7.748886085	7.668373424
TAU04	100190	Pacific	American Samoa	189.92	-14.212	-169.441	5.1	34.5	13.1	39.2	39.63	52.3			0.000459128	0.000548957	0.000169678	0.000209602	0.000828426		7.98E-05		0.000469109		0.001177762		0.000319393	0.013645934		0.001397345	0.000598862	0.000638786		0.020144	0.027292		0.022743223	0.000149716		0.087723858	52.3		138284.9867	598.7396383	788.9248297	13.6144495	37.48881593	13.18602244	117.4411505
TAU07	113731	Pacific	American Samoa	126.62	-14.227	-169.418	24.2	23.1	8.9	32.3	47.29	41.21			0.000457219	0.000518768	0.000307744	0.000211024	0.001081499		0.000158268		0.000369292		0.001283731		0.000167061	0.012978164		0.001714572	0.000835304	0.000738585		0.018386	0.018386		0.016222705	0.00022861		0.099499259	41.21		108344.5589	443.3660476	713.6517022	11.99349074	8.256333955	23.23214583	34.48613795
TAU11	65264	Pacific	American Samoa	36.4	-14.217	-169.513	5.8	44.7	5.6	39.6	50.5	45.2			0.00038306	0.000398382	0.000183869	0.000183869	0.001210468		0.000122579		0.000352415		0.001041922		0.000352415	0.011728944		0.001470949	0.000566928	0.000582251		0.013684	0.019548		0.013683768	0.000306448		0.076238137	45.2		166846.4024	106.5686822	1007.909944	20.90021598	14.38773469	80.9700655	80.12876839
TAU12	258250	Pacific	American Samoa	10.26	-14.258	-169.501	23.9	23.1	9.7	31.7	46.93	41.35			0.000425944	0.000422072	0.000263311	0.000402711	0.000867377		0.000100678		0.000282672		0.001332043		0.000282672	0.0269101		0.001270087	0.000515005	0.00061181		0.011644	0.017595		0.020441326	0.000224589		0.100395371	41.35		52715.5287	1289.352719	515.5931327	4320.534084	247.2490841	808.2671791	1356.739996
TUT05	129449	Pacific	American Samoa	24.08	-14.252	-170.623	12.6	12	12.7	46.9	24.64	59.62			0.000363077	0.000618004	0.000162226	0.000154501	0.000911556		9.27E-05		0.000409428		0.001081507		0.000301277	0.009378444		0.001220558	0.000540754	0.000679804		0.010316	0.020633		0.012191977	0.000162226		0.083468148	59.62		94225.6	362.6672645	569.6260385	168.5954092	14.50766119	30.61686661	0
TUT10	263241	Pacific	American Samoa	30.57	-14.311	-170.693	18.5	8.3	53.4	11.5	26.86	64.84			0.000319099	0.000691382	0.000136757	0.000417868	0.001135841		8.74E-05		0.000429264		0.001071262		0.000524234	0.023991433		0.001021877	0.000208934	0.000641997		0.004362	0.003053		0.018320731	0.000258318		0.074155338	64.84		10404.54295	541.6311242	90.68442733	865.3412393	46.3720109	145.5400947	476.7820156
TUT17	132901	Pacific	American Samoa	24.24	-14.246	-170.572	25.8	33	13.9	17.1	58.77	30.98			0.000368695	0.000428891	0.00018811	0.000173061	0.000820159		9.03E-05		0.0003085		0.000978172		0.00025583	0.010925483		0.001098562	0.00049661	0.00056433		0.01045	0.018051		0.012825568	0.00018811		0.082653657	30.98		93365.59484	202.7900964	562.8136176	153.9527576	21.19625399	29.82161734	49.18627343
TUT8	123852	Pacific	American Samoa	14.37	-14.292	-170.78	6.8	13.2	11	46	19.99	57.04			0.000516746	0.000670155	0.000306818	0.00019378	0.001090011		0.000129186		0.000347189		0.001098085		0.000355263	0.012173534		0.001517941	0.000767045	0.000678229		0.013188	0.026376		0.01775307	0.000153409		0.101953345	57.04		128140.2065	301.8413454	706.7318323	66.08040382	15.16327741	42.66729931	10.55599413
[truncated: 14 more columns]
