# Supplementary material for: Biophysical and physiological processes causing oxygen loss from coral reefs
Source: eLife. 2019 Dec 3;8:e49114. doi: 10.7554/eLife.49114 (PMC6890468; doi:10.7554/eLife.49114)
Supplement: Figure 3—source data 2. [file elife-49114-fig3-data2.csv]

Experiment	Treatment	Sample	Length (um)	Width (um)	Volume (um3)
POP Experiment 2	T0h	T1.1	0.321888924	0.321888447	0.017462875
POP Experiment 2	T0h	T1.1	1.04779053	0.914428711	0.487940956
POP Experiment 2	T0h	T1.1	1.07278442	0.922210693	0.511243481
POP Experiment 2	T0h	T1.1	0.846008301	0.711181641	0.241897282
POP Experiment 2	T0h	T1.1	0.21459198	0.21459198	0.005174151
POP Experiment 2	T0h	T1.1	0.339263916	0.069824218	0.001209969
POP Experiment 2	T0h	T1.1	0.239837646	0.050598144	0.000448341
POP Experiment 2	T0h	T1.1	0.107299805	0.10729599	0.000646803
POP Experiment 2	T0h	T1.1	1.73135376	0.342529297	0.149019455
POP Experiment 2	T0h	T1.1	0.678594589	0.407653809	0.070833826
POP Experiment 2	T0h	T1.1	0.86555481	0.758285522	0.276738246
POP Experiment 2	T0h	T1.1	0.913635254	0.810409546	0.331930131
POP Experiment 2	T0h	T1.1	1.75567627	1.14056396	1.405355073
POP Experiment 2	T0h	T1.1	0.339236259	0.236785889	0.011462739
POP Experiment 2	T0h	T1.1	0.991760254	0.816207886	0.376562875
POP Experiment 2	T0h	T1.1	0.864326477	0.769104004	0.282445034
POP Experiment 2	T0h	T1.1	0.455230713	0.379348755	0.037159862
POP Experiment 2	T0h	T1.1	0.643798828	0.643798828	0.139716973
POP Experiment 2	T0h	T1.1	0.959594727	0.867797852	0.396474159
POP Experiment 2	T0h	T1.1	0.812774658	0.710296631	0.228243672
POP Experiment 2	T0h	T1.1	0.84487915	0.710479736	0.241065134
POP Experiment 2	T0h	T1.1	0.910400391	0.834579468	0.345847575
POP Experiment 2	T0h	T1.1	0.85836792	0.751068115	0.269377054
POP Experiment 2	T0h	T1.1	0.837402344	0.614105225	0.187401781
POP Experiment 2	T0h	T1.1	0.303474426	0.227600098	0.00926023
POP Experiment 2	T0h	T1.1	0.711975098	0.47467041	0.097991683
POP Experiment 2	T0h	T1.1	0.765472412	0.675048828	0.193428609
POP Experiment 2	T0h	T1.1	0.227600098	0.151748657	0.003201512
POP Experiment 2	T0h	T1.1	0.606964111	0.303466797	0.036584606
POP Experiment 2	T0h	T1.1	0.773193359	0.623413086	0.172579443
POP Experiment 2	T0h	T1.1	0.70980835	0.607223511	0.146939291
POP Experiment 2	T0h	T1.1	0.812759399	0.710266113	0.228222044
POP Experiment 2	T0h	T1.1	0.536483765	0.42918396	0.056916211
POP Experiment 2	T0h	T1.1	0.862991333	0.719711304	0.253486954
POP Experiment 2	T0h	T1.1	1.0163269	0.856369019	0.420971064
POP Experiment 2	T0h	T1.1	1.47137451	0.993713379	0.884237822
POP Experiment 2	T0h	T1.1	0.645126343	0.539245605	0.106284217
POP Experiment 2	T0h	T1.1	0.762817383	0.62109375	0.168388298
POP Experiment 2	T0h	T1.1	0.237510681	0.135742188	0.002782377
POP Experiment 2	T0h	T1.1	0.237548828	0.135681152	0.002780721
POP Experiment 2	T0h	T1.1	0.227600098	0.151733398	0.00320096
POP Experiment 2	T0h	T1.1	0.593399048	0.48865509	0.080738752
POP Experiment 2	T0h	T1.1	0.606994629	0.531082153	0.095246421
POP Experiment 2	T0h	T1.1	0.758346558	0.634227753	0.172789725
POP Experiment 2	T0h	T1.1	0.107299805	0.107292175	0.000646769
POP Experiment 2	T0h	T1.1	0.64377594	0.64377594	0.139702072
POP Experiment 2	T0h	T1.1	0.682830811	0.45526123	0.08645075
POP Experiment 2	T0h	T1.1	0.78112793	0.338989258	0.060300888
POP Experiment 2	T0h	T1.1	0.775131226	0.718444824	0.217148844
POP Experiment 2	T0h	T1.1	0.671768188	0.623779297	0.141749533
POP Experiment 2	T0h	T1.1	0.643798828	0.536437988	0.105091832
POP Experiment 2	T0h	T1.1	1.39111328	0.576759338	0.313218699
POP Experiment 2	T0h	T1.1	1.29614258	0.96307373	0.710339769
POP Experiment 2	T0h	T1.1	1.97875977	1.37524414	2.2583521
POP Experiment 2	T0h	T1.1	0.720683098	0.672119141	0.176208585
POP Experiment 2	T0h	T1.1	1.71682739	0.644592285	0.490139166
POP Experiment 2	T0h	T1.1	0.85836792	0.85836792	0.331145652
POP Experiment 2	T0h	T1.1	0.910446167	0.834533691	0.345843022
POP Experiment 2	T0h	T1.1	1.7670517	1.35305023	1.892278894
POP Experiment 2	T0h	T1.1	0.775749207	0.66986084	0.194698084
POP Experiment 2	T0h	T1.1	0.864959717	0.772575378	0.284754848
POP Experiment 2	T0h	T1.1	0.888244629	0.880126953	0.361911051
POP Experiment 2	T0h	T1.1	0.237487793	0.135742188	0.002782045
POP Experiment 2	T0h	T1.1	0.882980347	0.511108398	0.146207067
POP Experiment 2	T0h	T1.1	0.10729599	0.10729599	0.000646769
POP Experiment 2	T0h	T1.1	0.321891785	0.321891785	0.01746338
POP Experiment 2	T0h	T1.1	0.793823242	0.652648926	0.192787051
POP Experiment 2	T0h	T1.1	1.07295227	0.96566391	0.55007132
POP Experiment 2	T0h	T1.1	0.650878906	0.359619141	0.05393551
POP Experiment 2	T0h	T1.1	0.858371735	0.85836792	0.33114786
POP Experiment 2	T0h	T1.1	0.577392578	0.476287842	0.07458632
POP Experiment 2	T0h	T1.1	0.835388184	0.608703613	0.184057378
POP Experiment 2	T0h	T1.1	0.625579834	0.386611938	0.05830994
POP Experiment 2	T0h	T1.1	0.780883789	0.710540771	0.215722884
POP Experiment 2	T0h	T1.1	0.959247589	0.864746094	0.39408409
POP Experiment 2	T0h	T1.1	0.455200195	0.303466797	0.025607679
POP Experiment 2	T0h	T1.1	2.20923805	1.05142212	1.613869282
POP Experiment 2	T0h	T1.1	0.884765625	0.729572296	0.268209334
POP Experiment 2	T0h	T1.1	0.95715332	0.864898682	0.392962877
POP Experiment 2	T0h	T1.1	0.719512939	0.574356079	0.136815829
POP Experiment 2	T0h	T1.1	0.70980835	0.607177734	0.146921556
POP Experiment 2	T0h	T1.1	0.107299805	0.107292175	0.000646769
POP Experiment 2	T0h	T1.1	2.15924072	0.966522217	1.347840422
POP Experiment 2	T0h	T1.1	0.841545105	0.678161621	0.222319813
POP Experiment 2	T0h	T1.1	0.470397949	0.366821289	0.036790284
POP Experiment 2	T0h	T1.1	0.864608765	0.808441162	0.305490266
POP Experiment 2	T0h	T1.1	0.237503052	0.101806641	0.001657107
POP Experiment 2	T0h	T1.1	0.473327637	0.323425293	0.030029496
POP Experiment 2	T0h	T1.1	1.10437012	0.76940918	0.394229796
POP Experiment 2	T0h	T1.1	1.6451416	0.909118652	0.871197373
POP Experiment 2	T0h	T1.1	1.00271606	0.66847229	0.273710303
POP Experiment 2	T0h	T1.1	0.862991333	0.719726563	0.253495634
POP Experiment 2	T0h	T1.1	0.832275391	0.652526855	0.205587551
POP Experiment 2	T0h	T1.1	1.30940247	0.772960663	0.493533617
POP Experiment 2	T0h	T1.1	1.15627098	0.687042236	0.343761177
POP Experiment 2	T0h	T1.1	1.14439392	0.871162415	0.509036931
POP Experiment 2	T0h	T1.1	0.643798828	0.643798828	0.139716973
POP Experiment 2	T0h	T1.1	0.816314697	0.640289307	0.194122916
POP Experiment 2	T0h	T1.1	1.05477905	0.578718185	0.226708295
POP Experiment 2	T0h	T1.1	0.659179688	0.454086304	0.082238357
POP Experiment 2	T0h	T1.1	0.86505127	0.718231201	0.2534799
POP Experiment 2	T0h	T1.1	0.53647995	0.321884155	0.034924794
POP Experiment 2	T0h	T1.1	0.776977539	0.528259277	0.131698227
POP Experiment 2	T0h	T1.1	0.643798828	0.643768311	0.139707039
POP Experiment 2	T0h	T1.1	0.837341309	0.556274414	0.158438246
POP Experiment 2	T0h	T1.1	0.303527832	0.151733398	0.004573903
POP Experiment 2	T0h	T1.1	0.544372559	0.341247559	0.039384613
POP Experiment 2	T0h	T1.1	0.536499023	0.429199219	0.05692173
POP Experiment 2	T0h	T1.1	0.455200195	0.37935257	0.037157016
POP Experiment 2	T0h	T1.1	0.709838867	0.60723877	0.146954041
POP Experiment 2	T0h	T1.1	0.366699219	0.263000488	0.015158548
POP Experiment 2	T0h	T1.1	0.606964111	0.303466797	0.036584606
POP Experiment 2	T0h	T1.1	1.22730255	0.893890381	0.583220276
POP Experiment 2	T0h	T1.1	0.709823608	0.607208252	0.146937798
POP Experiment 2	T0h	T1.1	0.321884155	0.21459198	0.009054626
POP Experiment 2	T0h	T1.1	0.606964111	0.531097412	0.095244007
POP Experiment 2	T0h	T1.1	0.709899902	0.560058594	0.128894956
POP Experiment 2	T0h	T1.1	1.19958496	0.673309326	0.347208146
POP Experiment 2	T0h	T1.1	0.570049286	0.422668457	0.060215541
POP Experiment 2	T0h	T1.1	0.10729599	0.10729599	0.000646769
POP Experiment 2	T0h	T1.1	0.10729599	0.10729599	0.000646769
POP Experiment 2	T0h	T1.1	0.536480665	0.42918396	0.056915762
POP Experiment 2	T0h	T1.1	1.45726776	1.37792969	1.488182529
POP Experiment 2	T0h	T1.1	0.922515869	0.576843262	0.190839401
POP Experiment 2	T0h	T1.1	0.593399048	0.488647342	0.080736676
POP Experiment 2	T0h	T1.1	0.775085449	0.718414307	0.217115964
POP Experiment 2	T0h	T1.1	0.536483765	0.536483765	0.080847831
POP Experiment 2	T0h	T1.1	0.678161621	0.479248047	0.093515986
POP Experiment 2	T0h	T1.1	0.569976807	0.255554199	0.024866315
POP Experiment 2	T0h	T1.1	1.15533447	0.915893555	0.560038034
POP Experiment 2	T0h	T1.1	0.606964111	0.606964111	0.117081333
POP Experiment 2	T0h	T1.1	0.536481857	0.536481857	0.080846969
POP Experiment 2	T0h	T1.1	0.643779755	0.64377594	0.139703314
POP Experiment 2	T0h	T1.1	0.669677734	0.529724121	0.108674349
POP Experiment 2	T0h	T1.1	0.107299805	0.10729599	0.000646803
POP Experiment 2	T0h	T1.1	0.648529053	0.368408203	0.056041298
POP Experiment 2	T0h	T1.1	0.624167919	0.479827881	0.083943996
POP Experiment 2	T0h	T1.1	0.71805954	0.321899414	0.049705066
POP Experiment 2	T0h	T1.1	1.00921631	0.628875732	0.248363337
POP Experiment 2	T0h	T1.1	0.606964111	0.455215454	0.074088462
POP Experiment 2	T0h	T1.1	0.676086426	0.546705246	0.115929137
POP Experiment 2	T0h	T1.1	0.938110352	0.495727539	0.149169903
POP Experiment 2	T0h	T1.1	0.536476135	0.42918396	0.056915107
POP Experiment 2	T0h	T1.1	0.577384949	0.476318359	0.074592707
POP Experiment 2	T0h	T1.1	0.593414307	0.488647461	0.08073957
POP Experiment 2	T0h	T1.1	0.107299805	0.107292175	0.000646769
POP Experiment 2	T0h	T1.1	0.678253174	0.577606201	0.127273378
POP Experiment 2	T0h	T1.1	0.569976807	0.255554199	0.024866315
POP Experiment 2	T0h	T1.1	1.15533447	0.915893555	0.560038034
POP Experiment 2	T0h	T1.1	0.606964111	0.606964111	0.117081333
POP Experiment 2	T0h	T1.1	0.536481857	0.536481857	0.080846969
POP Experiment 2	T0h	T1.1	0.643779755	0.64377594	0.139703314
POP Experiment 2	T0h	T1.1	0.669677734	0.529724121	0.108674349
POP Experiment 2	T0h	T1.1	0.107299805	0.10729599	0.000646803
POP Experiment 2	T0h	T1.1	0.648529053	0.368408203	0.056041298
POP Experiment 2	T0h	T1.1	0.624167919	0.479827881	0.083943996
POP Experiment 2	T0h	T1.1	0.71805954	0.321899414	0.049705066
POP Experiment 2	T0h	T1.1	1.00921631	0.628875732	0.248363337
POP Experiment 2	T0h	T1.1	0.606964111	0.455215454	0.074088462
POP Experiment 2	T0h	T1.1	0.676086426	0.546705246	0.115929137
POP Experiment 2	T0h	T1.1	0.938110352	0.495727539	0.149169903
POP Experiment 2	T0h	T1.1	0.536476135	0.42918396	0.056915107
POP Experiment 2	T0h	T1.1	0.577384949	0.476318359	0.074592707
POP Experiment 2	T0h	T1.1	0.593414307	0.488647461	0.08073957
POP Experiment 2	T0h	T1.1	0.107299805	0.107292175	0.000646769
POP Experiment 2	T0h	T1.1	0.678253174	0.577606201	0.127273378
POP Experiment 2	T0h	T1.1	1.01544189	0.821533203	0.393104824
POP Experiment 2	T0h	T1.1	0.521118164	0.380249023	0.044784559
POP Experiment 2	T0h	T1.1	0.817123413	0.494552612	0.125297954
POP Experiment 2	T0h	T1.1	0.531066895	0.455200195	0.061732797
POP Experiment 2	T0h	T1.1	0.622802734	0.484130859	0.08494098
POP Experiment 2	T0h	T1.1	0.830627441	0.701202393	0.230501296
POP Experiment 2	T0h	T1.1	0.624164224	0.479797363	0.083934489
POP Experiment 2	T0h	T1.1	0.107299805	0.10729599	0.000646803
POP Experiment 2	T0h	T1.1	0.47039032	0.366829872	0.036790897
POP Experiment 2	T0h	T1.1	0.42918396	0.321891785	0.026194656
POP Experiment 2	T0h	T1.1	0.602813721	0.517089844	0.090395134
POP Experiment 2	T0h	T1.1	0.851821899	0.440223694	0.107318728
POP Experiment 2	T0h	T1.1	0.802845001	0.674926758	0.206743985
POP Experiment 2	T0h	T1.1	0.719207764	0.631011963	0.159137413
POP Experiment 2	T0h	T1.1	0.606994629	0.531066895	0.095242075
POP Experiment 2	T0h	T1.1	0.85836792	0.751075745	0.2693814
POP Experiment 2	T0h	T1.1	0.544372559	0.341236115	0.039382321
POP Experiment 2	T0h	T1.1	0.684265137	0.446060181	0.083695066
POP Experiment 2	T0h	T1.1	0.10729599	0.107284546	0.000646665
POP Experiment 2	T0h	T1.1	0.227600098	0.151733398	0.00320096
POP Experiment 2	T0h	T1.1	0.338973999	0.100166321	0.002408051
POP Experiment 2	T0h	T1.1	0.33405304	0.137313843	0.004269094
POP Experiment 2	T0h	T1.1	0.214595795	0.21459198	0.005174289
POP Experiment 2	T0h	T1.1	1.30084229	1.09725952	0.884222575
POP Experiment 2	T0h	T1.1	0.107299805	0.107292175	0.000646769
POP Experiment 2	T0h	T1.1	0.237518311	0.101791382	0.001656776
POP Experiment 2	T0h	T1.1	0.643798828	0.643737793	0.139697104
POP Experiment 2	T0h	T1.1	1.01281738	0.675170898	0.282040492
POP Experiment 2	T0h	T1.1	0.107292175	0.107292175	0.0006467
POP Experiment 2	T0h	T1.1	0.386535645	0.063201904	0.001146568
POP Experiment 2	T0h	T1.1	1.01788712	0.98425293	0.524841627
POP Experiment 2	T0h	T1.1	0.606994629	0.455215454	0.074093429
POP Experiment 2	T0h	T1.1	0.662475586	0.479057312	0.090625685
POP Experiment 2	T0h	T1.1	0.643798828	0.64377594	0.139709522
POP Experiment 2	T0h	T1.1	0.38368988	0.242828369	0.014020668
POP Experiment 2	T0h	T1.1	0.606964111	0.531097412	0.095244007
POP Experiment 2	T0h	T1.1	0.593399048	0.488647461	0.080736708
POP Experiment 2	T0h	T1.1	1.07265472	0.620605469	0.261897741
POP Experiment 2	T0h	T1.1	0.107299805	0.10729599	0.000646803
POP Experiment 2	T0h	T1.1	0.606964111	0.227615356	0.021610411
POP Experiment 2	T0h	T1.1	0.56980896	0.366546631	0.04723505
POP Experiment 2	T0h	T1.1	0.321891785	0.32188797	0.017463069
POP Experiment 2	T0h	T1.1	0.768554688	0.640686035	0.178923609
POP Experiment 2	T0h	T1.1	0.577148438	0.440643311	0.065614923
POP Experiment 2	T0h	T1.1	0.536480427	0.42918396	0.056915728
POP Experiment 2	T0h	T1.1	0.53647995	0.53647995	0.080846106
POP Experiment 2	T0h	T1.1	0.671783447	0.623779297	0.141754196
POP Experiment 2	T0h	T1.1	0.623298645	0.432800293	0.070474076
POP Experiment 2	T0h	T1.1	0.227600098	0.151733398	0.00320096
POP Experiment 2	T0h	T1.1	1.05031586	0.625610352	0.258759236
POP Experiment 2	T0h	T1.1	0.42918396	0.42918396	0.041393207
POP Experiment 2	T0h	T1.1	0.758728027	0.606964111	0.160993456
POP Experiment 2	T0h	T1.1	0.107292175	0.107292175	0.0006467
POP Experiment 2	T0h	T1.1	1.32321167	0.618408203	0.335523491
POP Experiment 2	T0h	T1.1	0.473297119	0.323425293	0.030026989
POP Experiment 2	T0h	T1.1	0.751075745	0.751068115	0.221841716
POP Experiment 2	T0h	T1.1	0.76940918	0.460586548	0.102614496
POP Experiment 2	T0h	T1.1	2.14154053	1.637146	3.35930953
POP Experiment 2	T0h	T1.2	0.107296	0.107292	0.00064673
POP Experiment 2	T0h	T1.2	0.816833	0.727173	0.23856765
POP Experiment 2	T0h	T1.2	0.339111	0.238464	0.01159521
POP Experiment 2	T0h	T1.2	0.536469	0.429184	0.05691408
POP Experiment 2	T0h	T1.2	0.85918	0.750183	0.26923187
POP Experiment 2	T0h	T1.2	0.606956	0.531082	0.09523782
POP Experiment 2	T0h	T1.2	0.237518	0.135681	0.00278027
POP Experiment 2	T0h	T1.2	0.4552	0.303467	0.02560769
POP Experiment 2	T0h	T1.2	0.557251	0.549896	0.0888111
POP Experiment 2	T0h	T1.2	0.81604	0.672394	0.21018041
POP Experiment 2	T0h	T1.2	0.709839	0.607224	0.14694836
POP Experiment 2	T0h	T1.2	1.056747	0.87203	0.4575319
POP Experiment 2	T0h	T1.2	0.751076	0.751072	0.22184355
POP Experiment 2	T0h	T1.2	0.815857	0.751709	0.25087572
POP Experiment 2	T0h	T1.2	0.857178	0.518555	0.14452494
POP Experiment 2	T0h	T1.2	0.321892	0.321892	0.01746341
POP Experiment 2	T0h	T1.2	0.321892	0.321888	0.01746309
POP Experiment 2	T0h	T1.2	0.8125	0.718018	0.23207958
POP Experiment 2	T0h	T1.2	0.812378	0.60725	0.17665553
POP Experiment 2	T0h	T1.2	0.1073	0.1073	0.00064684
POP Experiment 2	T0h	T1.2	0.107296	0.107292	0.00064673
POP Experiment 2	T0h	T1.2	0.366615	0.263062	0.01515995
POP Experiment 2	T0h	T1.2	0.686218	0.536407	0.1146681
POP Experiment 2	T0h	T1.2	0.1073	0.107292	0.00064677
POP Experiment 2	T0h	T1.2	0.514191	0.47699	0.06347087
POP Experiment 2	T0h	T1.2	0.766113	0.530029	0.13005477
POP Experiment 2	T0h	T1.2	0.775146	0.718414	0.21714036
POP Experiment 2	T0h	T1.2	1.493286	0.812805	0.63424718
POP Experiment 2	T0h	T1.2	0.237549	0.135742	0.00278292
POP Experiment 2	T0h	T1.2	1.09314	0.878784	0.48535468
POP Experiment 2	T0h	T1.2	0.477783	0.330078	0.03146908
POP Experiment 2	T0h	T1.2	0.441101	0.203583	0.01214957
POP Experiment 2	T0h	T1.2	1.158632	0.97348	0.62084359
POP Experiment 2	T0h	T1.2	0.556343	0.461121	0.06724071
POP Experiment 2	T0h	T1.2	0.429185	0.32189	0.0261945
POP Experiment 2	T0h	T1.2	0.916718	0.60144	0.20348475
POP Experiment 2	T0h	T1.2	0.758705	0.758667	0.22865717
POP Experiment 2	T0h	T1.2	0.772331	0.718262	0.21592842
POP Experiment 2	T0h	T1.2	0.107296	0.107292	0.00064673
POP Experiment 2	T0h	T1.2	0.303467	0.151733	0.00457278
POP Experiment 2	T0h	T1.2	0.657135	0.657132	0.14857969
POP Experiment 2	T0h	T1.2	0.470383	0.366833	0.03679064
POP Experiment 2	T0h	T1.2	0.606949	0.4552	0.07408181
POP Experiment 2	T0h	T1.2	0.575134	0.381302	0.05116092
POP Experiment 2	T0h	T1.2	0.479736	0.384949	0.04089991
POP Experiment 2	T0h	T1.2	0.861084	0.753899	0.27220273
POP Experiment 2	T0h	T1.2	0.237511	0.101807	0.00165718
POP Experiment 2	T0h	T1.2	0.643776	0.643776	0.13970211
POP Experiment 2	T0h	T1.2	0.577377	0.476318	0.0745912
POP Experiment 2	T0h	T1.2	0.339119	0.238403	0.01159055
POP Experiment 2	T0h	T1.2	0.968636	0.648758	0.24871072
POP Experiment 2	T0h	T1.2	0.469849	0.262451	0.02068544
POP Experiment 2	T0h	T1.2	0.379349	0.303478	0.02012266
POP Experiment 2	T0h	T1.2	0.887756	0.674385	0.23680653
POP Experiment 2	T0h	T1.2	0.965698	0.643768	0.24448455
POP Experiment 2	T0h	T1.2	0.709822	0.607224	0.14694343
POP Experiment 2	T0h	T1.2	0.758698	0.758667	0.22865401
POP Experiment 2	T0h	T1.2	1.040741	0.833618	0.41636444
POP Experiment 2	T0h	T1.2	0.719513	0.574356	0.13681581
POP Experiment 2	T0h	T1.2	1.459381	0.749786	0.5340148
POP Experiment 2	T0h	T1.2	0.593407	0.488647	0.08073808
POP Experiment 2	T0h	T1.2	0.606506	0.441894	0.07042641
POP Experiment 2	T0h	T1.2	0.775665	0.676697	0.19784246
POP Experiment 2	T0h	T1.2	1.017853	0.744904	0.33537314
POP Experiment 2	T0h	T1.2	0.772339	0.718262	0.21593166
POP Experiment 2	T0h	T1.2	1.727905	0.911865	0.92992027
POP Experiment 2	T0h	T1.2	0.321899	0.1073	0.00258736
POP Experiment 2	T0h	T1.2	0.107296	0.107292	0.00064673
POP Experiment 2	T0h	T1.2	1.012199	0.567871	0.20842072
POP Experiment 2	T0h	T1.2	0.547058	0.335876	0.03855105
POP Experiment 2	T0h	T1.2	0.107296	0.107292	0.00064673
POP Experiment 2	T0h	T1.2	0.719521	0.669067	0.17456099
POP Experiment 2	T0h	T1.2	0.429184	0.429184	0.04139322
POP Experiment 2	T0h	T1.2	1.595093	0.570557	0.35919943
POP Experiment 2	T0h	T1.2	0.107296	0.107292	0.00064673
POP Experiment 2	T0h	T1.2	0.237511	0.135712	0.00278129
POP Experiment 2	T0h	T1.2	0.643799	0.643776	0.1397096
POP Experiment 2	T0h	T1.2	0.303497	0.227661	0.00926528
POP Experiment 2	T0h	T1.2	0.699196	0.604919	0.14299689
POP Experiment 2	T0h	T1.2	0.86377	0.657209	0.21870302
POP Experiment 2	T0h	T1.2	0.858276	0.643776	0.20952322
POP Experiment 2	T0h	T1.2	0.682831	0.606934	0.13902214
POP Experiment 2	T0h	T1.2	0.814568	0.644287	0.19555061
POP Experiment 2	T0h	T1.2	0.239807	0.050659	0.00044932
POP Experiment 2	T0h	T1.2	0.1073	0.107297	0.00064681
POP Experiment 2	T0h	T1.2	1.492332	0.58194	0.34533353
POP Experiment 2	T0h	T1.2	0.770348	0.62735	0.17348087
POP Experiment 2	T0h	T1.2	0.687717	0.458481	0.08830739
POP Experiment 2	T0h	T1.2	0.531082	0.455215	0.06173847
POP Experiment 2	T0h	T1.2	0.65918	0.454102	0.08224325
POP Experiment 2	T0h	T1.2	0.651489	0.449406	0.07957936
POP Experiment 2	T0h	T1.2	0.606934	0.4552	0.07407937
POP Experiment 2	T0h	T1.2	0.62561	0.534172	0.10029892
POP Experiment 2	T0h	T1.2	0.780945	0.469452	0.10808803
POP Experiment 2	T0h	T1.2	0.429184	0.321892	0.02619469
POP Experiment 2	T0h	T1.2	0.531097	0.455231	0.06174438
POP Experiment 2	T0h	T1.2	0.658295	0.444336	0.07911136
POP Experiment 2	T0h	T1.2	0.671204	0.478439	0.09199815
POP Experiment 2	T0h	T1.2	0.625122	0.417608	0.06655668
POP Experiment 2	T0h	T1.2	0.6712	0.478424	0.09199256
POP Experiment 2	T0h	T1.2	0.719727	0.479843	0.10122903
POP Experiment 2	T0h	T1.2	0.643776	0.643776	0.13970211
POP Experiment 2	T0h	T1.2	0.470383	0.366827	0.03678965
POP Experiment 2	T0h	T1.2	0.602814	0.51712	0.09040363
POP Experiment 2	T0h	T1.2	0.577385	0.476288	0.07458501
POP Experiment 2	T0h	T1.2	0.751099	0.643799	0.17464641
POP Experiment 2	T0h	T1.2	0.386871	0.148621	0.00585202
POP Experiment 2	T0h	T1.2	0.542053	0.462402	0.06514339
POP Experiment 2	T0h	T1.2	0.625427	0.292542	0.03548368
POP Experiment 2	T0h	T1.2	0.643799	0.429199	0.0724458
POP Experiment 2	T0h	T1.2	0.455261	0.151733	0.00731754
POP Experiment 2	T0h	T1.2	0.593399	0.488647	0.08073658
POP Experiment 2	T0h	T1.2	0.479675	0.384949	0.04089281
POP Experiment 2	T0h	T1.2	0.698204	0.674973	0.16932432
POP Experiment 2	T0h	T1.2	0.6828	0.606995	0.13903524
POP Experiment 2	T0h	T1.2	0.536476	0.429184	0.0569151
POP Experiment 2	T0h	T1.2	0.9077	0.674973	0.24428585
POP Experiment 2	T0h	T1.2	0.5158	0.439217	0.05596782
POP Experiment 2	T0h	T1.2	0.53363	0.386429	0.04747791
POP Experiment 2	T0h	T1.2	0.682831	0.455261	0.08645071
POP Experiment 2	T0h	T1.2	0.214592	0.214592	0.00517415
POP Experiment 2	T0h	T1.2	0.606949	0.606934	0.11706825
POP Experiment 2	T0h	T1.2	0.531128	0.455215	0.06174595
POP Experiment 2	T0h	T1.2	0.75824	0.313843	0.05056429
POP Experiment 2	T0h	T1.2	0.303482	0.2276	0.00926053
POP Experiment 2	T0h	T1.2	3.98175	0.694427	1.42038513
POP Experiment 2	T0h	T1.2	0.769426	0.535828	0.13322736
POP Experiment 2	T0h	T1.2	0.773682	0.593872	0.15947419
POP Experiment 2	T0h	T1.2	0.2276	0.151733	0.00320094
POP Experiment 2	T0h	T1.2	1.156555	0.654785	0.31595553
POP Experiment 2	T0h	T1.2	0.87645	0.556519	0.1680709
POP Experiment 2	T0h	T1.2	0.606934	0.455215	0.07408344
POP Experiment 2	T0h	T1.2	0.684387	0.536163	0.11416877
POP Experiment 2	T0h	T1.2	1.197418	0.380295	0.12161296
POP Experiment 2	T0h	T1.2	0.606934	0.455231	0.07408778
POP Experiment 2	T0h	T1.2	0.214592	0.214592	0.00517415
POP Experiment 2	T0h	T1.2	0.948578	0.897385	0.41076458
POP Experiment 2	T0h	T1.2	0.695679	0.463745	0.09139528
POP Experiment 2	T0h	T1.2	0.536499	0.536484	0.08085133
POP Experiment 2	T0h	T1.2	0.652405	0.227261	0.02339123
POP Experiment 2	T0h	T1.2	0.882492	0.766514	0.28932691
POP Experiment 2	T0h	T1.2	0.321888	0.321884	0.01746244
POP Experiment 2	T0h	T1.2	0.606964	0.455223	0.07409049
POP Experiment 2	T0h	T1.2	0.682831	0.606964	0.13903299
POP Experiment 2	T0h	T1.2	0.713638	0.324432	0.05005496
POP Experiment 2	T0h	T1.2	1.158417	0.471649	0.17492378
POP Experiment 2	T0h	T1.2	0.769913	0.482788	0.11148295
POP Experiment 2	T0h	T1.2	0.921207	0.625549	0.21903505
POP Experiment 2	T0h	T1.2	0.214569	0.1073	0.00161682
POP Experiment 2	T0h	T1.2	0.536484	0.53648	0.08084703
POP Experiment 2	T0h	T1.2	0.303497	0.075867	0.00125767
POP Experiment 2	T0h	T1.2	0.435181	0.337486	0.02886563
POP Experiment 2	T0h	T1.2	0.773727	0.535706	0.13414529
POP Experiment 2	T0h	T1.2	0.767059	0.672424	0.19280144
POP Experiment 2	T0h	T1.2	0.625641	0.386353	0.05824915
POP Experiment 2	T0h	T1.2	0.816284	0.640289	0.19411288
POP Experiment 2	T0h	T1.2	0.577377	0.476318	0.0745912
POP Experiment 2	T0h	T1.2	1.293091	0.514267	0.23298705
POP Experiment 2	T0h	T1.2	0.32189	0.321884	0.0174626
POP Experiment 2	T0h	T1.2	0.435472	0.195801	0.0111471
POP Experiment 2	T0h	T1.2	0.67852	0.440491	0.08102559
POP Experiment 2	T0h	T1.2	0.303467	0.151733	0.00457278
POP Experiment 2	T0h	T1.2	0.239838	0.050629	0.00044887
POP Experiment 2	T0h	T1.2	0.719727	0.482605	0.10222933
POP Experiment 2	T0h	T1.2	0.339111	0.238464	0.01159521
POP Experiment 2	T0h	T1.2	0.625229	0.476807	0.0832596
POP Experiment 2	T0h	T1.2	0.686279	0.473434	0.09303089
POP Experiment 2	T0h	T1.2	0.624664	0.507446	0.09212395
POP Experiment 2	T0h	T1.2	0.552979	0.402176	0.0532174
POP Experiment 2	T0h	T1.2	0.643799	0.429184	0.07244146
POP Experiment 2	T0h	T1.2	0.536499	0.429169	0.05691517
POP Experiment 2	T0h	T1.2	0.547005	0.291267	0.02997808
POP Experiment 2	T0h	T1.2	0.214593	0.214584	0.0051739
POP Experiment 2	T0h	T1.2	0.383881	0.239929	0.01374019
POP Experiment 2	T0h	T1.2	0.879395	0.333435	0.06708336
POP Experiment 2	T0h	T1.2	0.521088	0.38031	0.04479319
POP Experiment 2	T0h	T1.2	0.625244	0.476807	0.08326228
POP Experiment 2	T0h	T1.2	0.531097	0.455215	0.06174091
POP Experiment 2	T0h	T1.2	1.402527	0.562683	0.30212147
POP Experiment 2	T0h	T1.2	0.751099	0.643768	0.17463296
POP Experiment 2	T0h	T1.2	0.606964	0.60696	0.11708011
POP Experiment 2	T0h	T1.2	0.536438	0.429184	0.0569096
POP Experiment 2	T0h	T1.2	0.214592	0.214592	0.00517415
POP Experiment 2	T0h	T1.2	0.214592	0.214592	0.00517415
POP Experiment 2	T0h	T1.2	0.625118	0.417603	0.06655477
POP Experiment 2	T0h	T1.2	0.751076	0.536484	0.12935634
POP Experiment 2	T0h	T1.2	0.237518	0.135727	0.00278193
POP Experiment 2	T0h	T1.2	0.617565	0.538055	0.09963887
POP Experiment 2	T0h	T1.2	0.2146	0.107292	0.00161689
POP Experiment 2	T0h	T1.2	0.214594	0.214592	0.00517422
POP Experiment 2	T0h	T1.2	0.107296	0.107296	0.00064677
POP Experiment 2	T0h	T1.2	1.194351	1.087158	0.77228975
POP Experiment 2	T0h	T1.2	0.536499	0.429184	0.05691842
POP Experiment 2	T0h	T1.2	0.650177	0.436224	0.07544
POP Experiment 2	T0h	T1.2	0.988525	0.327148	0.07392686
POP Experiment 2	T0h	T1.2	0.429184	0.321892	0.02619469
POP Experiment 2	T0h	T1.2	1.276611	1.01828	0.76321927
POP Experiment 2	T0h	T1.2	0.339111	0.238495	0.01159777
POP Experiment 2	T0h	T1.2	0.470398	0.366821	0.03679024
POP Experiment 2	T0h	T1.2	0.68927	0.546936	0.11910634
POP Experiment 2	T0h	T1.2	0.379341	0.303467	0.02012088
POP Experiment 2	T0h	T1.2	0.652634	0.58017	0.12140705
POP Experiment 2	T0h	T1.2	0.671204	0.478394	0.09198354
POP Experiment 2	T0h	T1.2	1.011292	0.57254	0.21122786
POP Experiment 2	T0h	T1.2	0.764893	0.73584	0.22097171
POP Experiment 2	T0h	T1.2	0.659714	0.552803	0.11411222
POP Experiment 2	T0h	T1.2	0.751099	0.643778	0.1746373
POP Experiment 2	T0h	T1.2	0.643776	0.536484	0.10510123
POP Experiment 2	T0h	T1.2	1.255524	0.938416	0.65202282
POP Experiment 2	T0h	T1.2	0.214592	0.107296	0.00161692
POP Experiment 2	T0h	T1.2	0.683693	0.566803	0.12483822
POP Experiment 2	T0h	T1.2	0.303467	0.227608	0.00926046
POP Experiment 2	T0h	T1.2	0.676849	0.53125	0.11077817
POP Experiment 2	T0h	T1.2	0.855671	0.677734	0.22718689
POP Experiment 2	T0h	T1.2	0.107296	0.107292	0.00064673
POP Experiment 2	T0h	T1.2	0.379349	0.303467	0.02012146
POP Experiment 2	T0h	T1.2	0.107296	0.107296	0.00064677
POP Experiment 2	T0h	T1.2	0.858368	0.751076	0.26938158
POP Experiment 2	T0h	T1.2	0.379364	0.303497	0.0201258
POP Experiment 2	T0h	T1.2	1.014435	0.884766	0.4423697
POP Experiment 2	T0h	T1.2	0.1073	0.107292	0.00064677
POP Experiment 2	T0h	T1.2	0.80423	0.686136	0.21279882
POP Experiment 2	T0h	T1.2	1.087259	0.650528	0.28930031
POP Experiment 2	T0h	T1.2	1.719788	0.643158	0.48907754
POP Experiment 2	T0h	T1.2	0.606964	0.531097	0.09524387
POP Experiment 2	T0h	T1.2	0.606949	0.531067	0.095232
POP Experiment 2	T0h	T1.2	0.916687	0.541016	0.16927523
POP Experiment 2	T0h	T1.2	1.325043	0.798065	0.52975019
POP Experiment 2	T0h	T1.2	1.120239	0.646881	0.29730418
POP Experiment 2	T0h	T1.2	0.452589	0.253046	0.01851911
POP Experiment 2	T0h	T1.2	0.606964	0.531089	0.09524159
POP Experiment 2	T0h	T1.2	0.567383	0.44165	0.06436764
POP Experiment 2	T0h	T1.2	0.771088	0.479431	0.11035211
POP Experiment 2	T0h	T1.2	0.634033	0.619873	0.12898483
POP Experiment 2	T0h	T1.2	0.536482	0.53648	0.08084658
POP Experiment 2	T0h	T1.2	0.625156	0.566406	0.10994729
POP Experiment 2	T0h	T1.2	0.531097	0.4552	0.06173765
POP Experiment 2	T0h	T1.2	0.331207	0.184011	0.00717682
POP Experiment 2	T0h	T1.2	0.746338	0.624329	0.16477202
POP Experiment 2	T0h	T1.2	0.650879	0.543701	0.10903857
POP Experiment 2	T0h	T1.2	0.837524	0.733978	0.25084852
POP Experiment 2	T0h	T1.2	1.868164	0.913391	1.02460593
POP Experiment 2	T0h	T1.2	0.531067	0.455215	0.06173603
POP Experiment 2	T0h	T1.2	0.77179	0.532166	0.13220988
POP Experiment 2	T0h	T1.2	1.249298	0.754566	0.4461875
POP Experiment 2	T0h	T1.2	0.772339	0.718262	0.21593166
POP Experiment 2	T0h	T1.2	0.733154	0.55983	0.13453254
POP Experiment 2	T0h	T1.2	0.237518	0.135742	0.00278248
POP Experiment 2	T0h	T1.2	0.652466	0.469849	0.0859719
POP Experiment 2	T0h	T1.2	0.237488	0.135681	0.00277984
POP Experiment 2	T0h	T1.2	0.593407	0.488647	0.08073808
POP Experiment 2	T0h	T1.2	0.515747	0.439209	0.05595816
POP Experiment 2	T0h	T1.2	0.624146	0.479828	0.08394007
POP Experiment 2	T0h	T1.2	0.911209	0.572815	0.18561556
POP Experiment 2	T0h	T1.2	0.651485	0.449348	0.07956126
POP Experiment 2	T0h	T1.2	0.107296	0.107292	0.00064673
POP Experiment 2	T0h	T1.2	0.837585	0.620972	0.19097828
POP Experiment 2	T0h	T1.2	0.606962	0.4552	0.07408393
POP Experiment 2	T0h	T1.2	0.303482	0.151733	0.00457305
POP Experiment 2	T0h	T1.2	0.622208	0.479675	0.08354554
POP Experiment 2	T0h	T1.2	0.717773	0.515572	0.11397093
POP Experiment 2	T0h	T1.2	0.754944	0.687012	0.19496414
POP Experiment 2	T0h	T1.2	0.652832	0.51474	0.10014707
POP Experiment 2	T0h	T1.2	0.624176	0.479858	0.08395418
POP Experiment 2	T0h	T1.2	0.429199	0.321899	0.02619686
POP Experiment 2	T0h	T1.2	0.321892	0.107292	0.00258693
POP Experiment 2	T0h	T1.2	0.1073	0.107292	0.00064677
POP Experiment 2	T0h	T1.2	0.107292	0.107292	0.0006467
POP Experiment 2	T0h	T1.2	0.321899	0.1073	0.00258736
POP Experiment 2	T0h	T1.2	0.382675	0.148254	0.00575284
POP Experiment 2	T0h	T1.2	0.1073	0.107292	0.00064677
POP Experiment 2	T0h	T1.2	0.593384	0.488647	0.08073376
POP Experiment 2	T0h	T1.2	0.777313	0.498779	0.11939477
POP Experiment 2	T0h	T1.3	1.33783	0.777771	0.512439876
POP Experiment 2	T0h	T1.3	0.862976	0.719666	0.253454948
POP Experiment 2	T0h	T1.3	0.751036	0.324021	0.0530233
POP Experiment 2	T0h	T1.3	0.758698	0.606934	0.1609717
POP Experiment 2	T0h	T1.3	0.1073	0.107296	0.000646805
POP Experiment 2	T0h	T1.3	0.536484	0.429184	0.056916254
POP Experiment 2	T0h	T1.3	1.435441	0.717743	0.483981978
POP Experiment 2	T0h	T1.3	0.643616	0.577118	0.118040195
POP Experiment 2	T0h	T1.3	0.2146	0.214592	0.005174442
POP Experiment 2	T0h	T1.3	0.474487	0.237305	0.017487359
POP Experiment 2	T0h	T1.3	1.296143	0.465057	0.193836292
POP Experiment 2	T0h	T1.3	0.521088	0.38028	0.044787257
POP Experiment 2	T0h	T1.3	0.751099	0.536469	0.129355434
POP Experiment 2	T0h	T1.3	1.689987	1.051453	1.163089655
POP Experiment 2	T0h	T1.3	0.536482	0.429184	0.056915964
POP Experiment 2	T0h	T1.3	0.332264	0.293335	0.015846522
POP Experiment 2	T0h	T1.3	0.531097	0.455215	0.061740909
POP Experiment 2	T0h	T1.3	0.768581	0.577515	0.150902419
POP Experiment 2	T0h	T1.3	0.214539	0.107285	0.001616145
POP Experiment 2	T0h	T1.3	0.686127	0.511917	0.106098085
POP Experiment 2	T0h	T1.3	0.643784	0.536484	0.105103042
POP Experiment 2	T0h	T1.3	0.303467	0.2276	0.009259921
POP Experiment 2	T0h	T1.3	0.719757	0.288315	0.040716147
POP Experiment 2	T0h	T1.3	0.910461	0.910442	0.395156445
POP Experiment 2	T0h	T1.3	1.099991	0.886501	0.496557277
POP Experiment 2	T0h	T1.3	1.007813	0.556641	0.200102538
POP Experiment 2	T0h	T1.3	0.758575	0.606812	0.160883181
POP Experiment 2	T0h	T1.3	0.625671	0.386353	0.058252665
POP Experiment 2	T0h	T1.3	0.777817	0.606644	0.166372001
POP Experiment 2	T0h	T1.3	0.214592	0.214592	0.005174152
POP Experiment 2	T0h	T1.3	0.366638	0.263062	0.015161198
POP Experiment 2	T0h	T1.3	0.986221	0.871517	0.415023972
POP Experiment 2	T0h	T1.3	0.653931	0.546753	0.110743869
POP Experiment 2	T0h	T1.3	0.321899	0.214569	0.009053501
POP Experiment 2	T0h	T1.3	0.238953	0.091278	0.001364534
POP Experiment 2	T0h	T1.3	0.719395	0.532166	0.120555906
POP Experiment 2	T0h	T1.3	1.012085	0.809143	0.381734355
POP Experiment 2	T0h	T1.3	0.575672	0.370323	0.048709266
POP Experiment 2	T0h	T1.3	0.770569	0.557373	0.142683174
POP Experiment 2	T0h	T1.3	0.843384	0.691772	0.230319056
POP Experiment 2	T0h	T1.3	0.664808	0.451759	0.082424037
POP Experiment 2	T0h	T1.3	0.618011	0.398018	0.060386506
POP Experiment 2	T0h	T1.3	1.356262	0.532469	0.262487407
POP Experiment 2	T0h	T1.3	1.056736	0.872009	0.457507473
POP Experiment 2	T0h	T1.3	0.643777	0.536476	0.105098928
POP Experiment 2	T0h	T1.3	0.214592	0.214592	0.005174152
POP Experiment 2	T0h	T1.3	0.750977	0.643784	0.174600187
POP Experiment 2	T0h	T1.3	1.607666	0.388519	0.175241012
POP Experiment 2	T0h	T1.3	0.593408	0.488647	0.080738263
POP Experiment 2	T0h	T1.3	0.717529	0.537537	0.122171899
POP Experiment 2	T0h	T1.3	0.921967	0.620605	0.216314878
POP Experiment 2	T0h	T1.3	0.531128	0.455231	0.061749427
POP Experiment 2	T0h	T1.3	0.865047	0.6521	0.216311193
POP Experiment 2	T0h	T1.3	0.758362	0.459488	0.100354458
POP Experiment 2	T0h	T1.3	0.107296	0.107292	0.000646733
POP Experiment 2	T0h	T1.3	0.321899	0.2146	0.009055743
POP Experiment 2	T0h	T1.3	0.237488	0.135727	0.002781499
POP Experiment 2	T0h	T1.3	0.339121	0.238487	0.011597553
POP Experiment 2	T0h	T1.3	0.709839	0.607239	0.146954169
POP Experiment 2	T0h	T1.3	1.129944	0.950745	0.577196938
POP Experiment 2	T0h	T1.3	0.575043	0.433929	0.063650159
POP Experiment 2	T0h	T1.3	1.007813	0.581482	0.21616192
POP Experiment 2	T0h	T1.3	0.682831	0.606934	0.139022144
POP Experiment 2	T0h	T1.3	0.606956	0.4552	0.07408295
POP Experiment 2	T0h	T1.3	1.24585	0.4729	0.191136611
POP Experiment 2	T0h	T1.3	0.918518	0.615784	0.21241859
POP Experiment 2	T0h	T1.3	0.766113	0.53006	0.130067706
POP Experiment 2	T0h	T1.3	0.858398	0.858337	0.331145165
POP Experiment 2	T0h	T1.3	0.383911	0.191956	0.009258537
POP Experiment 2	T0h	T1.3	0.858398	0.751099	0.269407975
POP Experiment 2	T0h	T1.3	0.379349	0.303497	0.020124718
POP Experiment 2	T0h	T1.3	1.06218	0.758667	0.365844879
POP Experiment 2	T0h	T1.3	0.719727	0.52887	0.119381478
POP Experiment 2	T0h	T1.3	0.837502	0.733978	0.250839207
POP Experiment 2	T0h	T1.3	0.238953	0.091309	0.001365393
POP Experiment 2	T0h	T1.3	1.375916	0.847931	0.617361106
POP Experiment 2	T0h	T1.3	0.2146	0.1073	0.001617103
POP Experiment 2	T0h	T1.3	0.678223	0.479218	0.093517138
POP Experiment 2	T0h	T1.3	0.643799	0.536484	0.105106433
POP Experiment 2	T0h	T1.3	0.812759	0.710297	0.228237656
POP Experiment 2	T0h	T1.3	0.643776	0.643738	0.139689742
POP Experiment 2	T0h	T1.3	0.383087	0.09671	0.002577238
POP Experiment 2	T0h	T1.3	0.908939	0.675629	0.245126723
POP Experiment 2	T0h	T1.3	0.75708	0.590958	0.153625756
POP Experiment 2	T0h	T1.3	0.606964	0.531082	0.095239593
POP Experiment 2	T0h	T1.3	0.321888	0.321884	0.017462438
POP Experiment 2	T0h	T1.3	0.864258	0.62439	0.200904808
POP Experiment 2	T0h	T1.3	1.549805	0.856079	0.727809344
POP Experiment 2	T0h	T1.3	0.475037	0.339294	0.032724847
POP Experiment 2	T0h	T1.3	0.676849	0.531128	0.110736306
POP Experiment 2	T0h	T1.3	0.751076	0.536484	0.129356338
POP Experiment 2	T0h	T1.3	0.643799	0.536469	0.105101686
POP Experiment 2	T0h	T1.3	0.565063	0.459312	0.068258928
POP Experiment 2	T0h	T1.3	0.214592	0.214592	0.005174152
POP Experiment 2	T0h	T1.3	0.435181	0.337482	0.028865068
POP Experiment 2	T0h	T1.3	0.676086	0.5467	0.115927223
POP Experiment 2	T0h	T1.3	0.793823	0.65271	0.192816242
POP Experiment 2	T0h	T1.3	0.766602	0.561897	0.143651143
POP Experiment 2	T0h	T1.3	0.536377	0.429184	0.056900774
POP Experiment 2	T0h	T1.3	0.808044	0.573311	0.159262524
POP Experiment 2	T0h	T1.3	0.429199	0.321899	0.026196858
POP Experiment 2	T0h	T1.3	1.394806	0.456326	0.203238357
POP Experiment 2	T0h	T1.3	0.643777	0.643776	0.139702437
POP Experiment 2	T0h	T1.3	0.916412	0.779999	0.313656799
POP Experiment 2	T0h	T1.3	0.751083	0.643778	0.174632087
POP Experiment 2	T0h	T1.3	0.78093	0.677094	0.199922788
POP Experiment 2	T0h	T1.3	0.986267	0.663086	0.264256888
POP Experiment 2	T0h	T1.3	0.593445	0.488647	0.080745202
POP Experiment 2	T0h	T1.3	0.643776	0.536484	0.105101234
POP Experiment 2	T0h	T1.3	0.677452	0.621582	0.142699658
POP Experiment 2	T0h	T1.3	0.85202	0.714947	0.246375074
POP Experiment 2	T0h	T1.3	0.975555	0.596603	0.217123569
POP Experiment 2	T0h	T1.3	0.536484	0.536377	0.08082375
POP Experiment 2	T0h	T1.3	0.717897	0.577759	0.137720801
POP Experiment 2	T0h	T1.3	0.214592	0.214592	0.005174152
POP Experiment 2	T0h	T1.3	0.107296	0.107296	0.000646769
POP Experiment 2	T0h	T1.3	0.577362	0.476318	0.074588526
POP Experiment 2	T0h	T1.3	0.657135	0.657104	0.148570193
POP Experiment 2	T0h	T1.3	0.567322	0.441711	0.064372961
POP Experiment 2	T0h	T1.3	1.078247	0.659698	0.293388743
POP Experiment 2	T0h	T1.3	0.861176	0.438538	0.107996172
POP Experiment 2	T0h	T1.3	0.912964	0.579895	0.190072547
POP Experiment 2	T0h	T1.3	0.339264	0.069806	0.001209361
POP Experiment 2	T0h	T1.3	0.74054	0.472956	0.102403895
POP Experiment 2	T0h	T1.3	0.959045	0.770721	0.327571979
POP Experiment 2	T0h	T1.3	0.559143	0.359741	0.044643794
POP Experiment 2	T0h	T1.3	0.767029	0.672447	0.19280125
POP Experiment 2	T0h	T1.3	0.837585	0.621033	0.191009645
POP Experiment 2	T0h	T1.3	0.666992	0.576996	0.124113242
POP Experiment 2	T0h	T1.3	0.606995	0.4552	0.074089297
POP Experiment 2	T0h	T1.3	0.321888	0.107296	0.002587076
POP Experiment 2	T0h	T1.3	0.455231	0.379333	0.037157401
POP Experiment 2	T0h	T1.3	0.85675	0.837463	0.318159624
POP Experiment 2	T0h	T1.3	0.837845	0.545898	0.153509979
POP Experiment 2	T0h	T1.3	0.711578	0.685791	0.178403549
POP Experiment 2	T0h	T1.3	0.438652	0.319771	0.026667775
POP Experiment 2	T0h	T1.3	0.816671	0.531235	0.141764248
POP Experiment 2	T0h	T1.3	0.470398	0.366829	0.036791565
POP Experiment 2	T0h	T1.3	0.758698	0.469497	0.104254679
POP Experiment 2	T0h	T1.3	0.989212	0.558838	0.196943145
POP Experiment 2	T0h	T1.3	0.719788	0.479843	0.10124006
POP Experiment 2	T0h	T1.3	0.719177	0.63102	0.159131008
POP Experiment 2	T0h	T1.3	0.672302	0.481171	0.093085878
POP Experiment 2	T0h	T1.3	0.772766	0.62561	0.173441454
POP Experiment 2	T0h	T1.3	0.107296	0.107285	0.00064667
POP Experiment 2	T0h	T1.3	0.429199	0.321899	0.026196858
POP Experiment 2	T0h	T1.3	0.1073	0.107292	0.000646769
POP Experiment 2	T0h	T1.3	0.682827	0.606934	0.139020987
POP Experiment 2	T0h	T1.3	1.398743	1.339478	1.34187538
POP Experiment 2	T0h	T1.3	0.577393	0.476318	0.07459405
POP Experiment 2	T0h	T1.3	0.429199	0.321838	0.026188585
POP Experiment 2	T0h	T1.3	0.921875	0.553823	0.177605679
POP Experiment 2	T0h	T1.3	0.680798	0.666565	0.160036151
POP Experiment 2	T0h	T1.3	0.719604	0.57435	0.136837051
POP Experiment 2	T0h	T1.3	0.780579	0.650696	0.187447235
POP Experiment 2	T0h	T1.3	0.758698	0.682831	0.194483408
POP Experiment 2	T0h	T1.3	0.214592	0.214592	0.005174152
POP Experiment 2	T0h	T1.3	1.061523	0.768921	0.37390883
POP Experiment 2	T0h	T1.3	0.379349	0.303528	0.020128081
POP Experiment 2	T0h	T1.3	0.541443	0.375183	0.046032878
POP Experiment 2	T0h	T1.3	0.429184	0.429184	0.041393218
POP Experiment 2	T0h	T1.3	0.669678	0.457947	0.085159915
POP Experiment 2	T0h	T1.3	1.438324	1.105347	1.026644759
POP Experiment 2	T0h	T1.3	0.988922	0.770142	0.341087629
POP Experiment 2	T0h	T1.3	0.606934	0.531067	0.095228675
POP Experiment 2	T0h	T1.3	0.755646	0.546936	0.134700931
POP Experiment 2	T0h	T1.3	0.1073	0.107296	0.000646805
POP Experiment 2	T0h	T1.3	0.817139	0.436951	0.100691786
POP Experiment 2	T0h	T1.3	1.598419	0.843628	0.736286371
POP Experiment 2	T0h	T1.3	0.237503	0.135681	0.002780053
POP Experiment 2	T0h	T1.3	0.593445	0.488647	0.080745202
POP Experiment 2	T0h	T1.3	1.446564	1.220825	1.21694881
POP Experiment 2	T0h	T1.3	0.606934	0.531067	0.095228675
POP Experiment 2	T0h	T1.3	0.214584	0.1073	0.001616959
POP Experiment 2	T0h	T1.3	0.764282	0.64975	0.18160347
POP Experiment 2	T0h	T1.3	0.912506	0.725288	0.277119592
POP Experiment 2	T0h	T1.3	0.770554	0.557373	0.142679514
POP Experiment 2	T0h	T1.3	0.719849	0.719765	0.195275076
POP Experiment 2	T0h	T1.3	0.531128	0.455223	0.061747691
POP Experiment 2	T0h	T1.3	0.770508	0.557358	0.142661831
POP Experiment 2	T0h	T1.3	2.645813	1.223694	2.631959062
POP Experiment 2	T0h	T1.3	0.837982	0.717133	0.241919526
POP Experiment 2	T0h	T1.3	0.758728	0.6828	0.194480518
POP Experiment 2	T0h	T1.3	0.717896	0.577759	0.137720539
POP Experiment 2	T0h	T1.3	0.669521	0.56356	0.120148318
POP Experiment 2	T0h	T1.3	2.268364	0.717857	0.821229562
POP Experiment 2	T0h	T1.3	0.2276	0.151733	0.003200944
POP Experiment 2	T0h	T1.3	0.617554	0.538025	0.099627536
POP Experiment 2	T0h	T1.3	0.1073	0.107296	0.000646805
POP Experiment 2	T0h	T1.3	0.366608	0.263016	0.015155099
POP Experiment 2	T0h	T1.3	0.429184	0.429184	0.041393218
POP Experiment 2	T0h	T1.3	1.489517	0.864685	0.705428679
POP Experiment 2	T0h	T1.3	0.303482	0.151733	0.004573053
POP Experiment 2	T0h	T1.3	0.576813	0.37323	0.049495811
POP Experiment 2	T0h	T1.3	0.237518	0.135727	0.002781933
POP Experiment 2	T0h	T1.3	0.906265	0.701477	0.259878207
POP Experiment 2	T0h	T1.3	0.758698	0.682831	0.194483408
POP Experiment 2	T0h	T1.3	0.684387	0.536163	0.114168768
POP Experiment 2	T0h	T1.3	0.71875	0.295135	0.042440771
POP Experiment 2	T0h	T1.3	0.653366	0.439026	0.076753622
POP Experiment 2	T0h	T1.3	0.959076	0.77063	0.327523237
POP Experiment 2	T0h	T1.3	1.097015	0.710419	0.34097523
POP Experiment 2	T0h	T1.3	0.429199	0.321884	0.026194824
POP Experiment 2	T0h	T1.3	0.536499	0.429184	0.056918424
POP Experiment 2	T0h	T1.3	0.751099	0.643768	0.174632955
POP Experiment 2	T0h	T1.3	0.711548	0.685791	0.178392468
POP Experiment 2	T0h	T1.3	0.429199	0.321869	0.026192789
POP Experiment 2	T0h	T1.3	0.379333	0.303482	0.020121933
POP Experiment 2	T0h	T1.3	0.238953	0.091278	0.001364534
POP Experiment 2	T0h	T1.3	0.751076	0.751068	0.221841778
POP Experiment 2	T0h	T1.3	0.955811	0.68195	0.26608545
POP Experiment 2	T0h	T1.3	0.766754	0.615326	0.167017727
POP Experiment 2	T0h	T1.3	0.429184	0.429077	0.041377738
POP Experiment 2	T0h	T1.3	0.53648	0.429184	0.056915675
POP Experiment 2	T0h	T1.3	0.107296	0.107292	0.000646733
POP Experiment 2	T0h	T1.3	0.339111	0.23848	0.01159653
POP Experiment 2	T0h	T1.3	0.678238	0.577621	0.127274631
POP Experiment 2	T0h	T1.3	1.158997	0.772705	0.422716005
POP Experiment 2	T0h	T1.3	0.593405	0.488647	0.080737701
POP Experiment 2	T0h	T1.3	0.643777	0.643776	0.139702437
POP Experiment 2	T0h	T1.3	0.66246	0.479065	0.090625322
POP Experiment 2	T0h	T1.3	0.864319	0.769043	0.282406202
POP Experiment 2	T0h	T1.3	0.751074	0.751068	0.221840892
POP Experiment 2	T0h	T1.3	0.536499	0.536438	0.080840929
POP Experiment 2	T0h	T1.3	0.780579	0.678589	0.200499436
POP Experiment 2	T0h	T1.3	0.837524	0.734009	0.250865333
POP Experiment 2	T0h	T1.3	0.865021	0.771606	0.284220465
POP Experiment 2	T0h	T1.3	0.717896	0.577774	0.137726379
POP Experiment 2	T0h	T1.3	0.690857	0.544861	0.118735612
POP Experiment 2	T0h	T1.3	0.754822	0.652008	0.179458026
POP Experiment 2	T0h	T1.3	0.830994	0.682922	0.221005868
POP Experiment 2	T0h	T1.3	1.223389	0.601715	0.290850381
POP Experiment 2	T0h	T1.3	0.536499	0.429199	0.056921679
POP Experiment 2	T0h	T1.3	0.643776	0.536484	0.105101234
POP Experiment 2	T0h	T1.3	0.617554	0.53804	0.099631955
POP Experiment 2	T0h	T1.3	0.643776	0.643768	0.139699507
POP Experiment 2	T0h	T1.3	0.693756	0.567795	0.127739859
POP Experiment 2	T0h	T1.3	0.709824	0.607239	0.146949825
POP Experiment 2	T0h	T1.3	0.4552	0.379364	0.037158802
POP Experiment 2	T0h	T1.3	0.606964	0.531067	0.095235321
POP Experiment 2	T0h	T1.3	0.455231	0.4552	0.049391219
POP Experiment 2	T0h	T1.3	1.040161	0.742188	0.342974796
POP Experiment 2	T0h	T1.3	0.687012	0.33728	0.051336422
POP Experiment 2	T0h	T1.3	0.686798	0.557251	0.12219984
POP Experiment 2	T0h	T1.3	0.521088	0.38028	0.044787257
POP Experiment 2	T0h	T1.3	0.536499	0.429169	0.056915168
POP Experiment 2	T0h	T1.3	0.682831	0.606964	0.139032994
POP Experiment 2	T0h	T1.3	0.817154	0.436707	0.100593791
POP Experiment 2	T0h	T1.3	0.536407	0.385803	0.047673243
POP Experiment 2	T0h	T1.3	0.678238	0.577606	0.127269331
POP Experiment 2	T0h	T1.3	0.521088	0.380283	0.04478785
POP Experiment 2	T0h	T1.3	0.775871	0.47554	0.10964803
POP Experiment 2	T0h	T1.3	0.77356	0.575623	0.151375127
POP Experiment 2	T0h	T1.3	0.452591	0.253052	0.018519992
POP Experiment 2	T0h	T1.3	0.534515	0.329895	0.036288598
POP Experiment 2	T0h	T1.3	0.677963	0.574799	0.126206788
POP Experiment 2	T0h	T1.3	0.2276	0.151733	0.003200944
POP Experiment 2	T0h	T1.3	0.469879	0.262482	0.020691396
POP Experiment 2	T0h	T1.3	0.768494	0.431091	0.091194097
POP Experiment 2	T0h	T1.3	0.988098	0.640015	0.249251161
POP Experiment 2	T0h	T1.3	0.719727	0.385345	0.068957506
POP Experiment 2	T0h	T1.3	0.840973	0.385956	0.083337645
POP Experiment 2	T0h	T1.3	0.107296	0.107296	0.000646769
POP Experiment 2	T0h	T1.3	0.913574	0.810425	0.331908536
POP Experiment 2	T0h	T1.3	0.577667	0.43689	0.064767186
POP Experiment 2	T0h	T1.3	0.814209	0.576782	0.162505321
POP Experiment 2	T0h	T1.3	0.622225	0.479614	0.08353104
POP Experiment 2	T0h	T1.3	0.429192	0.429184	0.041394375
POP Experiment 2	T0h	T1.3	0.606956	0.4552	0.07408295
POP Experiment 2	T0h	T1.3	0.710449	0.512131	0.111182272
POP Experiment 2	T0h	T1.3	0.958771	0.666931	0.257277168
POP Experiment 2	T0h	T1.3	0.429184	0.321884	0.026193603
POP Experiment 2	T0h	T1.3	0.429184	0.214592	0.012935381
POP Experiment 2	T0h	T1.3	0.321884	0.1073	0.002587221
POP Experiment 2	T0h	T1.3	0.686584	0.465393	0.090405414
POP Experiment 2	T0h	T1.3	0.321889	0.214592	0.009054803
POP Experiment 2	T0h	T1.3	0.693787	0.56781	0.127753192
POP Experiment 2	T0h	T1.3	0.606964	0.303467	0.036584642
POP Experiment 2	T0h	T1.3	0.4552	0.2276	0.015433179
POP Experiment 2	T0h	T1.3	0.521057	0.38028	0.044783736
POP Experiment 2	T0h	T1.3	0.107296	0.107296	0.000646769
POP Experiment 2	T0h	T1.3	0.214592	0.214592	0.005174152
POP Experiment 2	T0h	T1.3	0.214592	0.107296	0.001616923
POP Experiment 2	T0h	T1.3	0.570068	0.422699	0.060225441
POP Experiment 2	T0h	T1.3	0.673981	0.291458	0.038484728
POP Experiment 2	T0h	T1.3	0.62561	0.534149	0.100292004
POP Experiment 2	T0h	T1.3	0.968903	0.551674	0.18764242
POP Experiment 2	T0h	T1.3	0.852966	0.633911	0.202513045
POP Experiment 2	T0h	T1.3	0.536499	0.429199	0.056921679
POP Experiment 2	T0h	T1.3	0.1073	0.1073	0.000646841
POP Experiment 2	T0h	T1.3	0.238892	0.091278	0.001364135
POP Experiment 2	T0h	T1.3	0.435242	0.337494	0.02887222
POP Experiment 2	T0h	T1.3	0.321892	0.321888	0.017463089
POP Experiment 2	T0h	T1.3	0.643799	0.643776	0.139709598
POP Experiment 2	T0h	T1.3	0.780586	0.678589	0.200501968
POP Experiment 2	T0h	T1.3	0.921021	0.456024	0.125602696
POP Experiment 2	T0h	T1.3	0.455231	0.2276	0.015434441
POP Experiment 2	T0h	T1.3	0.479614	0.384979	0.040890918
POP Experiment 2	T0h	T1.3	0.303528	0.2276	0.009262403
POP Experiment 2	T0h	T2.1	0.624165	0.479828	0.083943503
POP Experiment 2	T0h	T2.1	0.336365	0.105347	0.002625792
POP Experiment 2	T0h	T2.1	0.214593	0.214592	0.005174188
POP Experiment 2	T0h	T2.1	0.339111	0.238495	0.011597765
POP Experiment 2	T0h	T2.1	1.290222	0.867859	0.592099084
POP Experiment 2	T0h	T2.1	0.107296	0.107292	0.000646733
POP Experiment 2	T0h	T2.1	0.379333	0.303467	0.020120305
POP Experiment 2	T0h	T2.1	0.864319	0.726563	0.257939891
POP Experiment 2	T0h	T2.1	1.000061	0.83783	0.397380941
POP Experiment 2	T0h	T2.1	1.409561	0.637401	0.381982632
POP Experiment 2	T0h	T2.1	1.240784	0.788513	0.477554146
POP Experiment 2	T0h	T2.1	0.339302	0.135712	0.004253723
POP Experiment 2	T0h	T2.1	0.536481	0.429184	0.05691582
POP Experiment 2	T0h	T2.1	0.665871	0.453026	0.082990285
POP Experiment 2	T0h	T2.1	0.331207	0.147217	0.004802443
POP Experiment 2	T0h	T2.1	0.864868	0.34375	0.069630797
POP Experiment 2	T0h	T2.1	0.107296	0.107292	0.000646733
POP Experiment 2	T0h	T2.1	0.861771	0.8592	0.333600265
POP Experiment 2	T0h	T2.1	0.570435	0.515232	0.08312506
POP Experiment 2	T0h	T2.1	0.1073	0.107296	0.000646805
POP Experiment 2	T0h	T2.1	0.1073	0.107292	0.000646769
POP Experiment 2	T0h	T2.1	0.438904	0.225845	0.014566707
POP Experiment 2	T0h	T2.1	1.251251	0.810554	0.506234991
POP Experiment 2	T0h	T2.1	0.557243	0.549896	0.0888092
POP Experiment 2	T0h	T2.1	0.606934	0.4552	0.07407937
POP Experiment 2	T0h	T2.1	0.334059	0.137314	0.004269191
POP Experiment 2	T0h	T2.1	0.23983	0.050659	0.000449364
POP Experiment 2	T0h	T2.1	1.47522	1.115417	1.07820917
POP Experiment 2	T0h	T2.1	0.699188	0.604919	0.14299459
POP Experiment 2	T0h	T2.1	0.429184	0.429184	0.041393218
POP Experiment 2	T0h	T2.1	1.024735	0.918274	0.475935456
POP Experiment 2	T0h	T2.1	0.858372	0.751068	0.269378796
POP Experiment 2	T0h	T2.1	0.429184	0.429184	0.041393218
POP Experiment 2	T0h	T2.1	0.884575	0.675293	0.236196931
POP Experiment 2	T0h	T2.1	0.303467	0.22761	0.009260599
POP Experiment 2	T0h	T2.1	0.606964	0.4552	0.074084252
POP Experiment 2	T0h	T2.1	0.82959	0.716919	0.238416334
POP Experiment 2	T0h	T2.1	1.287598	0.858521	0.579708765
POP Experiment 2	T0h	T2.1	1.144653	0.963135	0.600046309
POP Experiment 2	T0h	T2.1	0.238953	0.091248	0.001363703
POP Experiment 2	T0h	T2.1	0.912521	0.835571	0.347651438
POP Experiment 2	T0h	T2.1	0.384743	0.096611	0.002584346
POP Experiment 2	T0h	T2.1	1.222588	1.128677	0.846809183
POP Experiment 2	T0h	T2.1	0.678009	0.531883	0.111253175
POP Experiment 2	T0h	T2.1	1.056664	0.66227	0.287950729
POP Experiment 2	T0h	T2.1	0.321892	0.321888	0.017463089
POP Experiment 2	T0h	T2.1	0.321899	0.214539	0.009051331
POP Experiment 2	T0h	T2.1	0.833954	0.653198	0.206498216
POP Experiment 2	T0h	T2.1	0.214592	0.107296	0.001616923
POP Experiment 2	T0h	T2.1	1.003296	0.852234	0.41026847
POP Experiment 2	T0h	T2.1	0.535156	0.336258	0.037570534
POP Experiment 2	T0h	T2.1	0.855682	0.677765	0.227207917
POP Experiment 2	T0h	T2.1	0.107296	0.107285	0.00064667
POP Experiment 2	T0h	T2.1	2.09729	1.758942	3.671558782
POP Experiment 2	T0h	T2.1	0.303467	0.2276	0.009259921
POP Experiment 2	T0h	T2.1	0.321884	0.107296	0.00258704
POP Experiment 2	T0h	T2.1	0.383696	0.242859	0.014024016
POP Experiment 2	T0h	T2.1	0.884201	0.718697	0.261514426
POP Experiment 2	T0h	T2.1	0.238892	0.091309	0.001364994
POP Experiment 2	T0h	T2.1	0.107296	0.107285	0.00064667
POP Experiment 2	T0h	T2.1	0.643777	0.53648	0.105100194
POP Experiment 2	T0h	T2.1	0.339111	0.238489	0.011597271
POP Experiment 2	T0h	T2.1	0.983261	0.871437	0.413198244
POP Experiment 2	T0h	T2.1	0.678223	0.479218	0.093517138
POP Experiment 2	T0h	T2.1	0.107292	0.107292	0.000646697
POP Experiment 2	T0h	T2.1	0.214592	0.107292	0.001616814
POP Experiment 2	T0h	T2.1	0.536499	0.536476	0.08084952
POP Experiment 2	T0h	T2.1	0.660522	0.446899	0.080241963
POP Experiment 2	T0h	T2.1	1.072754	0.686096	0.31205459
POP Experiment 2	T0h	T2.1	0.303467	0.151733	0.004572782
POP Experiment 2	T0h	T2.1	1.255737	0.954742	0.671163649
POP Experiment 2	T0h	T2.1	0.339111	0.238487	0.011597106
POP Experiment 2	T0h	T2.1	1.160522	0.83429	0.482394031
POP Experiment 2	T0h	T2.1	1.521179	0.91449	0.798924989
POP Experiment 2	T0h	T2.1	0.303589	0.075867	0.001258082
POP Experiment 2	T0h	T2.1	1.110012	1.067749	0.675234577
POP Experiment 2	T0h	T2.1	0.2276	0.151749	0.003201522
POP Experiment 2	T0h	T2.1	0.303467	0.151764	0.004574464
POP Experiment 2	T0h	T2.1	1.760139	1.00145	1.123481966
POP Experiment 2	T0h	T2.1	0.53595	0.386841	0.047835739
POP Experiment 2	T0h	T2.1	0.849182	0.54657	0.156495584
POP Experiment 2	T0h	T2.1	0.321888	0.321884	0.017462438
POP Experiment 2	T0h	T2.1	0.96698	0.755295	0.320449586
POP Experiment 2	T0h	T2.1	0.718033	0.495331	0.106547998
POP Experiment 2	T0h	T2.1	0.237503	0.135742	0.002782259
POP Experiment 2	T0h	T2.1	0.659172	0.454102	0.08224195
POP Experiment 2	T0h	T2.1	1.102356	0.715515	0.347349123
POP Experiment 2	T0h	T2.1	0.951782	0.744629	0.30639278
POP Experiment 2	T0h	T2.1	0.334061	0.137321	0.004269621
POP Experiment 2	T0h	T2.1	0.321892	0.107296	0.002587112
POP Experiment 2	T0h	T2.1	0.744347	0.624817	0.164369351
POP Experiment 2	T0h	T2.1	1.318008	0.998722	0.77171995
POP Experiment 2	T0h	T2.1	1.14447	0.771912	0.415174198
POP Experiment 2	T0h	T2.1	1.070862	0.559692	0.217563844
POP Experiment 2	T0h	T2.1	0.1073	0.107296	0.000646805
POP Experiment 2	T0h	T2.1	1.459387	0.615204	0.372851748
POP Experiment 2	T0h	T2.1	0.339111	0.238464	0.011595212
POP Experiment 2	T0h	T2.1	1.062195	0.910439	0.493935736
POP Experiment 2	T0h	T2.1	0.719177	0.631012	0.159127807
POP Experiment 2	T0h	T2.1	0.712326	0.448029	0.088755937
POP Experiment 2	T0h	T2.1	0.81514	0.643265	0.195227329
POP Experiment 2	T0h	T2.1	0.922974	0.773315	0.312432723
POP Experiment 2	T0h	T2.1	0.379349	0.303482	0.02012309
POP Experiment 2	T0h	T2.1	0.386688	0.175018	0.007899336
POP Experiment 2	T0h	T2.1	0.709808	0.607178	0.146921557
POP Experiment 2	T0h	T2.1	0.303467	0.227661	0.009264058
POP Experiment 2	T0h	T2.1	0.862976	0.719727	0.253489644
POP Experiment 2	T0h	T2.1	0.643799	0.536484	0.105106433
POP Experiment 2	T0h	T2.1	0.534378	0.295453	0.029884586
POP Experiment 2	T0h	T2.1	0.4552	0.379364	0.037158802
POP Experiment 2	T0h	T2.1	0.75853	0.652023	0.180702713
POP Experiment 2	T0h	T2.1	0.2146	0.1073	0.001617103
POP Experiment 2	T0h	T2.1	0.863037	0.535675	0.154259726
POP Experiment 2	T0h	T2.1	0.303467	0.227615	0.009260938
POP Experiment 2	T0h	T2.1	0.864349	0.769043	0.282420137
POP Experiment 2	T0h	T2.1	0.107296	0.107285	0.00064667
POP Experiment 2	T0h	T2.1	0.442401	0.364319	0.033458482
POP Experiment 2	T0h	T2.1	0.867996	0.55184	0.16360767
POP Experiment 2	T0h	T2.1	5.765656	1.173218	5.810213851
POP Experiment 2	T0h	T2.1	0.107292	0.107292	0.000646697
POP Experiment 2	T0h	T2.1	0.546488	0.468506	0.067288409
POP Experiment 2	T0h	T2.1	0.773254	0.408234	0.083400304
POP Experiment 2	T0h	T2.1	1.099915	0.624542	0.273179854
POP Experiment 2	T0h	T2.1	0.773254	0.623428	0.172604694
POP Experiment 2	T0h	T2.1	0.53648	0.214592	0.016815995
POP Experiment 2	T0h	T2.1	1.326447	0.884277	0.633599636
POP Experiment 2	T0h	T2.1	0.776123	0.669159	0.194504042
POP Experiment 2	T0h	T2.1	0.577377	0.476318	0.074591199
POP Experiment 2	T0h	T2.1	0.536499	0.429199	0.056921679
POP Experiment 2	T0h	T2.1	0.949585	0.780487	0.329842632
POP Experiment 2	T0h	T2.1	0.758698	0.606995	0.160998174
POP Experiment 2	T0h	T2.1	1.08609	0.666222	0.301196282
POP Experiment 2	T0h	T2.1	0.2146	0.1073	0.001617103
POP Experiment 2	T0h	T2.1	0.812744	0.710327	0.228247029
POP Experiment 2	T0h	T2.1	1.062195	0.986267	0.560328977
POP Experiment 2	T0h	T2.1	1.832703	0.716156	0.642080085
POP Experiment 2	T0h	T2.1	0.879333	0.68103	0.237621132
POP Experiment 2	T0h	T2.1	0.429185	0.429184	0.041393363
POP Experiment 2	T0h	T2.1	0.643776	0.643738	0.139689742
POP Experiment 2	T0h	T2.1	1.077072	0.761143	0.374637227
POP Experiment 2	T0h	T2.1	0.715515	0.599274	0.145474169
POP Experiment 2	T0h	T2.1	0.758652	0.559744	0.140772705
POP Experiment 2	T0h	T2.1	0.754547	0.440885	0.092757238
POP Experiment 2	T0h	T2.1	0.455231	0.379349	0.037159933
POP Experiment 2	T0h	T2.1	0.875305	0.776131	0.291715635
POP Experiment 2	T0h	T2.1	0.429184	0.429184	0.041393218
POP Experiment 2	T0h	T2.1	1.291756	0.511597	0.230482585
POP Experiment 2	T0h	T2.1	0.600647	0.442364	0.069651743
POP Experiment 2	T0h	T2.1	1.076111	0.96875	0.555162799
POP Experiment 2	T0h	T2.1	0.952682	0.845917	0.376946706
POP Experiment 2	T0h	T2.1	0.709824	0.607239	0.146949825
POP Experiment 2	T0h	T2.1	0.718834	0.572632	0.135968838
POP Experiment 2	T0h	T2.1	0.77877	0.615051	0.17046574
POP Experiment 2	T0h	T2.1	0.767059	0.672455	0.192815545
POP Experiment 2	T0h	T2.1	2.083313	1.540833	2.926969758
POP Experiment 2	T0h	T2.1	0.948578	0.8974	0.410775153
POP Experiment 2	T0h	T2.1	1.110542	0.546722	0.217927459
POP Experiment 2	T0h	T2.1	1.012207	0.45694	0.141010998
POP Experiment 2	T0h	T2.1	0.544239	0.34079	0.039280797
POP Experiment 2	T0h	T2.1	0.429184	0.429169	0.041391048
POP Experiment 2	T0h	T2.1	0.805283	0.546738	0.14627235
POP Experiment 2	T0h	T2.1	0.8367	0.49469	0.129121421
POP Experiment 2	T0h	T2.1	0.837952	0.550079	0.155564654
POP Experiment 2	T0h	T2.1	0.958313	0.675964	0.263048635
POP Experiment 2	T0h	T2.1	0.719181	0.631012	0.159129058
POP Experiment 2	T0h	T2.1	0.53648	0.536476	0.080845225
POP Experiment 2	T0h	T2.1	0.671814	0.623791	0.14176766
POP Experiment 2	T0h	T2.1	1.619385	1.317284	1.608561112
POP Experiment 2	T0h	T2.1	1.019836	0.791389	0.371889984
POP Experiment 2	T0h	T2.1	0.861168	0.545761	0.158899684
POP Experiment 2	T0h	T2.1	1.076233	0.345734	0.090217789
POP Experiment 2	T0h	T2.1	0.577744	0.338989	0.041944818
POP Experiment 2	T0h	T2.1	1.29541	1.055511	0.825640359
POP Experiment 2	T0h	T2.1	0.214592	0.214592	0.005174152
POP Experiment 2	T0h	T2.1	0.78067	0.543457	0.139066409
POP Experiment 2	T0h	T2.1	0.237518	0.135742	0.002782476
POP Experiment 2	T0h	T2.1	0.676582	0.557632	0.119841006
POP Experiment 2	T0h	T2.1	0.781357	0.663136	0.193519511
POP Experiment 2	T0h	T2.1	0.570068	0.422668	0.060218058
POP Experiment 2	T0h	T2.1	0.477051	0.339111	0.032876965
POP Experiment 2	T0h	T2.1	0.321884	0.2146	0.0090552
POP Experiment 2	T0h	T2.1	1.221924	0.984608	0.680485266
POP Experiment 2	T0h	T2.1	1.441772	0.60791	0.359655907
POP Experiment 2	T0h	T2.1	1.015579	0.573196	0.212761989
POP Experiment 2	T0h	T2.1	0.321899	0.1073	0.002587356
POP Experiment 2	T0h	T2.1	0.239807	0.050629	0.000448806
POP Experiment 2	T0h	T2.1	1.010254	0.770538	0.351324334
POP Experiment 2	T0h	T2.1	0.321892	0.321892	0.017463415
POP Experiment 2	T0h	T2.1	0.911987	0.780937	0.312142367
POP Experiment 2	T0h	T2.1	0.239746	0.050629	0.000448683
POP Experiment 2	T0h	T2.1	0.919373	0.628448	0.220201281
POP Experiment 2	T0h	T2.1	0.429184	0.1073	0.003557483
POP Experiment 2	T0h	T2.1	0.237518	0.101807	0.001657239
POP Experiment 2	T0h	T2.1	0.837311	0.606201	0.183342754
POP Experiment 2	T0h	T2.1	0.754318	0.645931	0.176626995
POP Experiment 2	T0h	T2.1	0.916718	0.641205	0.227001384
POP Experiment 2	T0h	T2.1	0.767059	0.672424	0.192801437
POP Experiment 2	T0h	T2.1	0.429184	0.429184	0.041393218
POP Experiment 2	T0h	T2.1	0.339111	0.238525	0.011600236
POP Experiment 2	T0h	T2.1	0.767029	0.672455	0.19280489
POP Experiment 2	T0h	T2.1	0.383873	0.239929	0.013739828
POP Experiment 2	T0h	T2.1	0.816422	0.719666	0.23451805
POP Experiment 2	T0h	T2.1	0.988377	0.815491	0.374259391
POP Experiment 2	T0h	T2.1	0.617554	0.538048	0.099634311
POP Experiment 2	T0h	T2.1	0.237518	0.135712	0.002781391
POP Experiment 2	T0h	T2.1	0.536484	0.536476	0.080846129
POP Experiment 2	T0h	T2.1	1.014893	0.832825	0.40163596
POP Experiment 2	T0h	T2.1	0.536484	0.536484	0.080847937
POP Experiment 2	T0h	T2.1	0.676758	0.531143	0.11072129
POP Experiment 2	T0h	T2.1	0.470383	0.366837	0.036791302
POP Experiment 2	T0h	T2.1	0.606934	0.4552	0.07407937
POP Experiment 2	T0h	T2.1	0.958282	0.731689	0.300383218
POP Experiment 2	T0h	T2.1	0.429185	0.429184	0.041393363
POP Experiment 2	T0h	T2.1	1.865311	0.745483	0.705709798
POP Experiment 2	T0h	T2.1	0.684387	0.536133	0.11415825
POP Experiment 2	T0h	T2.1	0.214584	0.107296	0.00161685
POP Experiment 2	T0h	T2.1	1.111233	0.915131	0.530265612
POP Experiment 2	T0h	T2.1	0.617569	0.538055	0.099639784
POP Experiment 2	T0h	T2.1	0.756912	0.242706	0.031275483
POP Experiment 2	T0h	T2.1	0.536484	0.429184	0.056916254
POP Experiment 2	T0h	T2.1	0.4552	0.379395	0.037163707
POP Experiment 2	T0h	T2.1	0.107296	0.107292	0.000646733
POP Experiment 2	T0h	T2.1	0.719757	0.575806	0.137445165
POP Experiment 2	T0h	T2.1	1.223373	0.639465	0.3244431
POP Experiment 2	T0h	T2.1	0.643768	0.53648	0.105098159
POP Experiment 2	T0h	T2.1	0.858368	0.751072	0.269379302
POP Experiment 2	T0h	T2.1	0.107296	0.107292	0.000646733
POP Experiment 2	T0h	T2.1	0.684204	0.535538	0.113908459
POP Experiment 2	T0h	T2.1	0.768188	0.671631	0.192840593
POP Experiment 2	T0h	T2.1	0.339127	0.238525	0.011600951
POP Experiment 2	T0h	T2.1	0.593399	0.488647	0.080736575
POP Experiment 2	T0h	T2.1	0.107296	0.107292	0.000646733
POP Experiment 2	T0h	T2.1	0.237549	0.135742	0.002782924
POP Experiment 2	T0h	T2.1	0.1073	0.107292	0.000646769
POP Experiment 2	T0h	T2.1	0.884186	0.583244	0.184287374
POP Experiment 2	T0h	T2.1	1.199585	0.912384	0.585450173
POP Experiment 2	T0h	T2.1	0.912842	0.781067	0.312635204
POP Experiment 2	T0h	T2.1	0.837997	0.686829	0.225653944
POP Experiment 2	T0h	T2.1	0.429184	0.321888	0.026194146
POP Experiment 2	T0h	T2.1	0.883057	0.691406	0.245016581
POP Experiment 2	T0h	T2.1	0.606567	0.441895	0.070436031
POP Experiment 2	T0h	T2.1	0.536481	0.321888	0.034925609
POP Experiment 2	T0h	T2.1	0.676575	0.557634	0.119839993
POP Experiment 2	T0h	T2.1	0.214592	0.214592	0.005174152
POP Experiment 2	T0h	T2.1	0.809128	0.414223	0.09043063
POP Experiment 2	T0h	T2.1	1.250397	1.043243	0.771578124
POP Experiment 2	T0h	T2.1	0.214592	0.214592	0.005174152
POP Experiment 2	T0h	T2.1	1.109802	1.056702	0.664380018
POP Experiment 2	T0h	T2.1	0.834534	0.758698	0.262952948
POP Experiment 2	T0h	T2.1	1.216248	0.911591	0.595480793
POP Experiment 2	T0h	T2.1	0.758667	0.606964	0.16097575
POP Experiment 2	T0h	T2.1	0.606964	0.455223	0.074090491
POP Experiment 2	T0h	T2.1	0.812744	0.710297	0.228231713
POP Experiment 2	T0h	T2.1	0.429185	0.429184	0.041393363
POP Experiment 2	T0h	T2.1	0.321899	0.1073	0.002587356
POP Experiment 2	T0h	T2.1	0.853943	0.786469	0.287487042
POP Experiment 2	T0h	T2.1	1.594566	0.843994	0.73470152
POP Experiment 2	T0h	T2.1	0.606995	0.531097	0.095250733
POP Experiment 2	T0h	T2.1	0.606934	0.53109	0.095235226
POP Experiment 2	T0h	T2.1	0.717743	0.515503	0.113938964
POP Experiment 2	T0h	T2.1	1.290649	0.98291	0.730717044
POP Experiment 2	T0h	T2.1	0.753525	0.311172	0.04941642
POP Experiment 2	T0h	T2.1	0.758698	0.606995	0.160998174
POP Experiment 2	T0h	T2.1	0.237518	0.135712	0.002781391
POP Experiment 2	T0h	T2.1	0.534513	0.329895	0.036288427
POP Experiment 2	T0h	T2.1	0.985291	0.850586	0.398764415
POP Experiment 2	T0h	T2.1	0.772339	0.718269	0.215934923
POP Experiment 2	T0h	T2.1	0.862839	0.755569	0.273947306
POP Experiment 2	T0h	T2.1	1.350319	0.628113	0.353534089
POP Experiment 2	T0h	T2.1	0.753159	0.545929	0.133701793
POP Experiment 2	T0h	T2.1	0.81076	0.66394	0.204076062
POP Experiment 2	T0h	T2.1	0.643776	0.53648	0.105099968
POP Experiment 2	T0h	T2.1	0.237488	0.135727	0.002781499
POP Experiment 2	T0h	T2.1	0.681484	0.57518	0.127256033
POP Experiment 2	T0h	T2.1	0.772675	0.558472	0.143672546
POP Experiment 2	T0h	T2.1	0.82959	0.716919	0.238416334
POP Experiment 2	T0h	T2.1	0.831299	0.612	0.184530144
POP Experiment 2	T0h	T2.1	0.455261	0.379333	0.037160791
POP Experiment 2	T0h	T2.1	0.764404	0.664917	0.188467552
POP Experiment 2	T0h	T2.1	0.835999	0.599243	0.179442176
POP Experiment 2	T0h	T2.1	0.690369	0.479065	0.09565596
POP Experiment 2	T0h	T2.1	0.715637	0.477058	0.099492246
POP Experiment 2	T0h	T2.1	0.339111	0.23848	0.01159653
POP Experiment 2	T0h	T2.1	0.575684	0.370331	0.048712376
POP Experiment 2	T0h	T2.1	0.751068	0.643776	0.174626337
POP Experiment 2	T0h	T2.1	0.767029	0.67244	0.192798064
POP Experiment 2	T0h	T2.1	0.107292	0.107292	0.000646697
POP Experiment 2	T0h	T2.1	1.069458	0.864212	0.458349575
POP Experiment 2	T0h	T2.1	0.769669	0.461044	0.102836348
POP Experiment 2	T0h	T2.1	0.774292	0.761642	0.237103736
POP Experiment 2	T0h	T2.2	0.379349	0.303482	0.02012309
POP Experiment 2	T0h	T2.2	1.53463	0.949905	0.8631688
POP Experiment 2	T0h	T2.2	0.429199	0.429199	0.041397558
POP Experiment 2	T0h	T2.2	0.765015	0.685638	0.19807254
POP Experiment 2	T0h	T2.2	0.65271	0.443176	0.077896965
POP Experiment 2	T0h	T2.2	0.429184	0.32189	0.026194417
POP Experiment 2	T0h	T2.2	0.214592	0.214592	0.005174152
POP Experiment 2	T0h	T2.2	0.606964	0.531067	0.095235321
POP Experiment 2	T0h	T2.2	0.643799	0.643799	0.139717085
POP Experiment 2	T0h	T2.2	0.379351	0.303467	0.020121607
POP Experiment 2	T0h	T2.2	0.573639	0.385376	0.051927233
POP Experiment 2	T0h	T2.2	1.30571	0.604126	0.316552422
POP Experiment 2	T0h	T2.2	0.672424	0.337784	0.050167641
POP Experiment 2	T0h	T2.2	0.643776	0.429077	0.072407174
POP Experiment 2	T0h	T2.2	0.429138	0.321899	0.026191894
POP Experiment 2	T0h	T2.2	0.834595	0.758698	0.262980525
POP Experiment 2	T0h	T2.2	0.96566	0.96566	0.471488766
POP Experiment 2	T0h	T2.2	0.940796	0.733734	0.29438279
POP Experiment 2	T0h	T2.2	0.214592	0.214592	0.005174152
POP Experiment 2	T0h	T2.2	1.10199	0.656618	0.29904315
POP Experiment 2	T0h	T2.2	0.531128	0.455231	0.061749427
POP Experiment 2	T0h	T2.2	0.606964	0.4552	0.074084252
POP Experiment 2	T0h	T2.2	0.55632	0.461113	0.067234981
POP Experiment 2	T0h	T2.2	0.570053	0.422668	0.060215953
POP Experiment 2	T0h	T2.2	0.678467	0.505798	0.102447548
POP Experiment 2	T0h	T2.2	0.987976	0.828308	0.383597986
POP Experiment 2	T0h	T2.2	1.140411	0.793915	0.433540109
POP Experiment 2	T0h	T2.2	1.365662	0.834595	0.594916746
POP Experiment 2	T0h	T2.2	0.214592	0.214592	0.005174152
POP Experiment 2	T0h	T2.2	0.214592	0.214592	0.005174152
POP Experiment 2	T0h	T2.2	0.961304	0.666016	0.257560423
POP Experiment 2	T0h	T2.2	0.1073	0.1073	0.000646841
POP Experiment 2	T0h	T2.2	0.756683	0.657068	0.182313367
POP Experiment 2	T0h	T2.2	0.617561	0.538055	0.099637965
POP Experiment 2	T0h	T2.2	0.682831	0.606934	0.139022144
POP Experiment 2	T0h	T2.2	0.4552	0.151733	0.00731644
POP Experiment 2	T0h	T2.2	0.969406	0.86338	0.399053847
POP Experiment 2	T0h	T2.2	1.327141	0.963867	0.733935996
POP Experiment 2	T0h	T2.2	0.6828	0.606964	0.139024025
POP Experiment 2	T0h	T2.2	0.321888	0.214592	0.009054766
POP Experiment 2	T0h	T2.2	1.006485	0.864014	0.421256219
POP Experiment 2	T0h	T2.2	0.1073	0.107292	0.000646769
POP Experiment 2	T0h	T2.2	0.535095	0.47699	0.067206277
POP Experiment 2	T0h	T2.2	0.536469	0.321899	0.034926721
POP Experiment 2	T0h	T2.2	1.309708	1.134201	0.941279339
POP Experiment 2	T0h	T2.2	1.786869	1.450577	2.153923579
POP Experiment 2	T0h	T2.2	0.837929	0.417084	0.095488837
POP Experiment 2	T0h	T2.2	1.197495	0.718506	0.388430224
POP Experiment 2	T0h	T2.2	0.622284	0.407654	0.06348429
POP Experiment 2	T0h	T2.2	0.321888	0.321888	0.017462764
POP Experiment 2	T0h	T2.2	0.321892	0.321888	0.017463089
POP Experiment 2	T0h	T2.2	0.339142	0.238525	0.011601622
POP Experiment 2	T0h	T2.2	0.643784	0.643776	0.139704715
POP Experiment 2	T0h	T2.2	0.567337	0.441772	0.064389924
POP Experiment 2	T0h	T2.2	0.678345	0.47644	0.092622892
POP Experiment 2	T0h	T2.2	0.570068	0.422668	0.060218058
POP Experiment 2	T0h	T2.2	0.470398	0.366821	0.036790242
POP Experiment 2	T0h	T2.2	1.087311	0.86853	0.472665719
POP Experiment 2	T0h	T2.2	0.303467	0.2276	0.009259921
POP Experiment 2	T0h	T2.2	0.606964	0.531067	0.095235321
POP Experiment 2	T0h	T2.2	0.989075	0.780396	0.348669148
POP Experiment 2	T0h	T2.2	0.703819	0.57309	0.132273926
POP Experiment 2	T0h	T2.2	0.62323	0.385925	0.057854824
POP Experiment 2	T0h	T2.2	0.671814	0.623795	0.141769071
POP Experiment 2	T0h	T2.2	0.107296	0.107292	0.000646733
POP Experiment 2	T0h	T2.2	0.23751	0.135719	0.002781528
POP Experiment 2	T0h	T2.2	0.709824	0.607208	0.146937814
POP Experiment 2	T0h	T2.2	0.758698	0.682831	0.194483408
POP Experiment 2	T0h	T2.2	0.864738	0.624939	0.201349359
POP Experiment 2	T0h	T2.2	0.814719	0.745621	0.247217747
POP Experiment 2	T0h	T2.2	0.643799	0.536469	0.105101686
POP Experiment 2	T0h	T2.2	0.435234	0.337494	0.028871504
POP Experiment 2	T0h	T2.2	0.92157	0.510742	0.15392867
POP Experiment 2	T0h	T2.2	0.321888	0.214596	0.009055056
POP Experiment 2	T0h	T2.2	0.767044	0.672455	0.192810217
POP Experiment 2	T0h	T2.2	0.813354	0.613373	0.179921287
POP Experiment 2	T0h	T2.2	0.474487	0.237244	0.017479268
POP Experiment 2	T0h	T2.2	0.758705	0.606995	0.1610002
POP Experiment 2	T0h	T2.2	0.676575	0.468384	0.089674816
POP Experiment 2	T0h	T2.2	0.606934	0.531097	0.095237219
POP Experiment 2	T0h	T2.2	0.1073	0.107296	0.000646805
POP Experiment 2	T0h	T2.2	0.767044	0.672455	0.192810217
POP Experiment 2	T0h	T2.2	1.056	0.578049	0.226563259
POP Experiment 2	T0h	T2.2	1.187897	0.868782	0.532518083
POP Experiment 2	T0h	T2.2	0.383865	0.191925	0.009254515
POP Experiment 2	T0h	T2.2	0.334061	0.137329	0.004270079
POP Experiment 2	T0h	T2.2	0.858398	0.751068	0.269390315
POP Experiment 2	T0h	T2.2	0.470398	0.366821	0.036790242
POP Experiment 2	T0h	T2.2	1.054749	1.017288	0.581674762
POP Experiment 2	T0h	T2.2	0.606995	0.531097	0.095250733
POP Experiment 2	T0h	T2.2	0.773743	0.417343	0.086815213
POP Experiment 2	T0h	T2.2	0.719185	0.631042	0.159142313
POP Experiment 2	T0h	T2.2	0.429199	0.321869	0.026192789
POP Experiment 2	T0h	T2.2	0.686279	0.47345	0.093036242
POP Experiment 2	T0h	T2.2	0.625122	0.417603	0.066555319
POP Experiment 2	T0h	T2.2	0.606964	0.4552	0.074084252
POP Experiment 2	T0h	T2.2	0.606995	0.455261	0.074105845
POP Experiment 2	T0h	T2.2	1.34433	1.00354	0.7987333
POP Experiment 2	T0h	T2.2	0.536469	0.429184	0.056914083
POP Experiment 2	T0h	T2.2	0.593404	0.488647	0.080737513
POP Experiment 2	T0h	T2.2	1.696472	0.883728	0.85989002
POP Experiment 2	T0h	T2.2	0.227612	0.151733	0.003201161
POP Experiment 2	T0h	T2.2	0.879822	0.641411	0.215203273
POP Experiment 2	T0h	T2.2	0.64378	0.536484	0.105102138
POP Experiment 2	T0h	T2.2	0.564667	0.458855	0.068082871
POP Experiment 2	T0h	T2.2	0.680817	0.666565	0.160042781
POP Experiment 2	T0h	T2.2	0.64378	0.643776	0.139703413
POP Experiment 2	T0h	T2.2	0.772705	0.64469	0.18208608
POP Experiment 2	T0h	T2.2	0.4552	0.303467	0.025607694
POP Experiment 2	T0h	T2.2	0.813858	0.507813	0.130550654
POP Experiment 2	T0h	T2.2	1.306717	0.770538	0.489569038
POP Experiment 2	T0h	T2.2	0.237509	0.135719	0.002781514
POP Experiment 2	T0h	T2.2	0.321892	0.321889	0.017463171
POP Experiment 2	T0h	T2.2	0.782959	0.557495	0.145760143
POP Experiment 2	T0h	T2.2	0.573792	0.338699	0.041525722
POP Experiment 2	T0h	T2.2	1.621979	0.867783	0.788225391
POP Experiment 2	T0h	T2.2	1.273682	0.963638	0.694654284
POP Experiment 2	T0h	T2.2	0.758698	0.606958	0.160982116
POP Experiment 2	T0h	T2.2	0.862976	0.719696	0.253472012
POP Experiment 2	T0h	T2.2	0.334045	0.137299	0.004268125
POP Experiment 2	T0h	T2.2	1.185211	0.748174	0.411421774
POP Experiment 2	T0h	T2.2	0.773209	0.623413	0.172584178
POP Experiment 2	T0h	T2.2	0.2146	0.107292	0.001616886
POP Experiment 2	T0h	T2.2	0.214592	0.214584	0.005173863
POP Experiment 2	T0h	T2.2	0.577362	0.476313	0.074587257
POP Experiment 2	T0h	T2.2	0.459687	0.335545	0.030758793
POP Experiment 2	T0h	T2.2	1.197773	0.865051	0.534489381
POP Experiment 2	T0h	T2.2	0.214592	0.107296	0.001616923
POP Experiment 2	T0h	T2.2	0.719177	0.631042	0.15913981
POP Experiment 2	T0h	T2.2	0.455223	0.303482	0.025611528
POP Experiment 2	T0h	T2.2	0.672697	0.567329	0.12224603
POP Experiment 2	T0h	T2.2	1.322083	0.792236	0.521538621
POP Experiment 2	T0h	T2.2	1.661453	1.576294	2.216924693
POP Experiment 2	T0h	T2.2	0.71489	0.33919	0.054381025
POP Experiment 2	T0h	T2.2	0.606934	0.531097	0.095237219
POP Experiment 2	T0h	T2.2	0.606934	0.531097	0.095237219
POP Experiment 2	T0h	T2.2	0.379333	0.303482	0.020121933
POP Experiment 2	T0h	T2.2	0.577667	0.43689	0.064767186
POP Experiment 2	T0h	T2.2	1.339722	0.970093	0.751213165
POP Experiment 2	T0h	T2.2	0.916382	0.636215	0.223903947
POP Experiment 2	T0h	T2.2	0.986313	0.910522	0.44459839
POP Experiment 2	T0h	T2.2	0.606964	0.2276	0.021607699
POP Experiment 2	T0h	T2.2	0.989197	0.848389	0.399329174
POP Experiment 2	T0h	T2.2	0.838013	0.713257	0.239840131
POP Experiment 2	T0h	T2.2	0.965668	0.643776	0.244479996
POP Experiment 2	T0h	T2.2	1.072962	1.07296	0.646770841
POP Experiment 2	T0h	T2.2	0.303528	0.2276	0.009262403
POP Experiment 2	T0h	T2.2	0.751076	0.643776	0.174628941
POP Experiment 2	T0h	T2.2	0.758728	0.758728	0.228695151
POP Experiment 2	T0h	T2.2	1.045776	0.781128	0.376378831
POP Experiment 2	T0h	T2.2	0.916382	0.78006	0.313681805
POP Experiment 2	T0h	T2.2	1.971565	0.676392	0.627416834
POP Experiment 2	T0h	T2.2	1.135314	1.073639	0.703833859
POP Experiment 2	T0h	T2.2	0.762817	0.621096	0.168389174
POP Experiment 2	T0h	T2.2	1.011456	0.862366	0.422875085
POP Experiment 2	T0h	T2.2	1.44714	0.652649	0.41134827
POP Experiment 2	T0h	T2.2	1.237839	0.935852	0.636887667
POP Experiment 2	T0h	T2.2	0.998657	0.920279	0.460225377
POP Experiment 2	T0h	T2.2	0.762802	0.621094	0.168383747
POP Experiment 2	T0h	T2.2	0.922485	0.772049	0.311379223
POP Experiment 2	T0h	T2.2	0.898376	0.864872	0.358413319
POP Experiment 2	T0h	T2.2	0.959106	0.719322	0.292324993
POP Experiment 2	T0h	T2.2	0.829575	0.716858	0.238377916
POP Experiment 2	T0h	T2.2	0.624146	0.479828	0.083940067
POP Experiment 2	T0h	T2.2	0.767059	0.672424	0.192801437
POP Experiment 2	T0h	T2.2	1.05423	0.880005	0.462790986
POP Experiment 2	T0h	T2.2	0.772705	0.644714	0.182097026
POP Experiment 2	T0h	T2.2	0.321899	0.321888	0.017463659
POP Experiment 2	T0h	T2.2	0.366608	0.263	0.015153545
POP Experiment 2	T0h	T2.2	1.092995	0.880829	0.487112491
POP Experiment 2	T0h	T2.2	1.218475	1.07016	0.775123888
POP Experiment 2	T0h	T2.2	0.470383	0.366837	0.036791302
POP Experiment 2	T0h	T2.2	1.151282	0.576477	0.250338794
POP Experiment 2	T0h	T2.2	0.77478	0.684753	0.201266262
POP Experiment 2	T0h	T2.2	0.107296	0.107292	0.000646733
POP Experiment 2	T0h	T2.2	0.771591	0.625412	0.172991001
POP Experiment 2	T0h	T2.2	0.237503	0.101776	0.001656192
POP Experiment 2	T0h	T2.2	0.214592	0.214592	0.005174152
POP Experiment 2	T0h	T2.2	0.948914	0.835266	0.367394871
POP Experiment 2	T0h	T2.2	0.99881	0.979492	0.506597406
POP Experiment 2	T0h	T2.2	0.876923	0.656004	0.222483098
POP Experiment 2	T0h	T2.2	0.519379	0.478638	0.064744849
POP Experiment 2	T0h	T2.2	0.239836	0.050659	0.000449376
POP Experiment 2	T0h	T2.2	0.868164	0.764343	0.281448023
POP Experiment 2	T0h	T2.2	0.321899	0.321888	0.017463659
POP Experiment 2	T0h	T2.2	0.33923	0.236816	0.011464937
POP Experiment 2	T0h	T2.2	0.321892	0.321892	0.017463415
POP Experiment 2	T0h	T2.2	0.902466	0.89004	0.376901759
POP Experiment 2	T0h	T2.2	2.789665	1.410156	3.622761424
POP Experiment 2	T0h	T2.2	1.536152	0.757446	0.578424428
POP Experiment 2	T0h	T2.2	0.339127	0.238525	0.011600951
POP Experiment 2	T0h	T2.2	0.107292	0.107292	0.000646697
POP Experiment 2	T0h	T2.2	0.814209	0.576767	0.162498176
POP Experiment 2	T0h	T2.2	1.621124	0.785103	0.658108907
POP Experiment 2	T0h	T2.2	0.237488	0.135681	0.002779836
POP Experiment 2	T0h	T2.2	2.54834	1.413391	3.259078787
POP Experiment 2	T0h	T2.2	0.955017	0.826843	0.364807062
POP Experiment 2	T0h	T2.2	0.812805	0.710327	0.228271203
POP Experiment 2	T0h	T2.2	0.643784	0.643777	0.139705041
POP Experiment 2	T0h	T2.2	0.593384	0.488647	0.080733762
POP Experiment 2	T0h	T2.2	0.751068	0.751068	0.221838234
POP Experiment 2	T0h	T2.2	0.671204	0.478424	0.091993281
POP Experiment 2	T0h	T2.2	1.198029	0.872375	0.542272046
POP Experiment 2	T0h	T2.2	0.435242	0.337494	0.02887222
POP Experiment 2	T0h	T2.2	0.751072	0.751068	0.221840006
POP Experiment 2	T0h	T2.2	0.971451	0.763112	0.327970105
POP Experiment 2	T0h	T2.2	0.851364	0.686859	0.230622846
POP Experiment 2	T0h	T2.2	0.884199	0.718704	0.261517763
POP Experiment 2	T0h	T2.2	0.994858	0.533752	0.182792944
POP Experiment 2	T0h	T2.2	0.366638	0.263016	0.015156729
POP Experiment 2	T0h	T2.2	0.837997	0.479309	0.122376024
POP Experiment 2	T0h	T2.2	1.071369	0.833313	0.432819441
POP Experiment 2	T0h	T2.2	0.987732	0.687744	0.281766869
POP Experiment 2	T0h	T2.2	1.902641	1.519592	2.531999525
POP Experiment 2	T0h	T2.2	1.1092	0.701065	0.337962404
POP Experiment 2	T0h	T2.2	0.38385	0.239868	0.013732722
POP Experiment 2	T0h	T2.2	0.321884	0.2146	0.0090552
POP Experiment 2	T0h	T2.2	0.2146	0.1073	0.001617103
POP Experiment 2	T0h	T2.2	0.668114	0.434052	0.077451889
POP Experiment 2	T0h	T2.2	0.856476	0.498581	0.134768405
POP Experiment 2	T0h	T2.2	0.531097	0.455231	0.061744381
POP Experiment 2	T0h	T2.2	1.284668	0.710968	0.415927935
POP Experiment 2	T0h	T2.2	1.548012	1.441284	1.741771053
POP Experiment 2	T0h	T2.2	0.751099	0.751068	0.221851968
POP Experiment 2	T0h	T2.2	0.864441	0.436829	0.10773078
POP Experiment 2	T0h	T2.2	0.4552	0.303467	0.025607694
POP Experiment 2	T0h	T2.2	0.985168	0.772339	0.340934631
POP Experiment 2	T0h	T2.2	0.1073	0.107292	0.000646769
POP Experiment 2	T0h	T2.2	0.965645	0.864685	0.397797097
POP Experiment 2	T0h	T2.2	0.865036	0.625427	0.201705516
POP Experiment 2	T0h	T2.2	0.910522	0.758698	0.297306589
POP Experiment 2	T0h	T2.2	0.577576	0.522156	0.086409163
POP Experiment 2	T0h	T2.2	0.107292	0.107292	0.000646697
POP Experiment 2	T0h	T2.3	0.469887	0.262482	0.020691828
POP Experiment 2	T0h	T2.3	0.531097	0.455261	0.061750892
POP Experiment 2	T0h	T2.3	0.408356	0.25824	0.016879706
POP Experiment 2	T0h	T2.3	0.321888	0.107296	0.002587076
POP Experiment 2	T0h	T2.3	0.385681	0.104797	0.003025406
POP Experiment 2	T0h	T2.3	0.75808	0.437843	0.092166272
POP Experiment 2	T0h	T2.3	0.758698	0.379333	0.071453333
POP Experiment 2	T0h	T2.3	0.429186	0.429184	0.041393507
POP Experiment 2	T0h	T2.3	0.214594	0.214592	0.005174225
POP Experiment 2	T0h	T2.3	0.214592	0.214592	0.005174152
POP Experiment 2	T0h	T2.3	0.339123	0.238464	0.011595748
POP Experiment 2	T0h	T2.3	0.766602	0.56189	0.143648142
POP Experiment 2	T0h	T2.3	1.746582	0.464172	0.269371773
POP Experiment 2	T0h	T2.3	1.759796	0.489563	0.300542191
POP Experiment 2	T0h	T2.3	1.153286	0.392288	0.123587104
POP Experiment 2	T0h	T2.3	0.949493	0.746994	0.306993477
POP Experiment 2	T0h	T2.3	1.459099	0.442139	0.201394892
POP Experiment 2	T0h	T2.3	1.094193	0.358444	0.098357771
POP Experiment 2	T0h	T2.3	0.321888	0.321888	0.017462764
POP Experiment 2	T0h	T2.3	0.473511	0.371063	0.037829792
POP Experiment 2	T0h	T2.3	0.107296	0.107296	0.000646769
POP Experiment 2	T0h	T2.3	0.214539	0.1073	0.001616552
POP Experiment 2	T0h	T2.3	0.2276	0.151749	0.003201522
POP Experiment 2	T0h	T2.3	0.643776	0.429184	0.072438132
POP Experiment 2	T0h	T2.3	0.477051	0.339111	0.032876965
POP Experiment 2	T0h	T2.3	0.718872	0.392975	0.07130314
POP Experiment 2	T0h	T2.3	0.366638	0.263008	0.015155952
POP Experiment 2	T0h	T2.3	0.816284	0.439484	0.101604805
POP Experiment 2	T0h	T2.3	0.455208	0.303467	0.025608273
POP Experiment 2	T0h	T2.3	0.624969	0.268163	0.030249139
POP Experiment 2	T0h	T2.3	0.858398	0.1073	0.007438658
POP Experiment 2	T0h	T2.3	0.55896	0.545654	0.088176467
POP Experiment 2	T0h	T2.3	0.577148	0.440643	0.065614779
POP Experiment 2	T0h	T2.3	0.303528	0.2276	0.009262403
POP Experiment 2	T0h	T2.3	0.214592	0.214584	0.005173863
POP Experiment 2	T0h	T2.3	0.429184	0.429184	0.041393218
POP Experiment 2	T0h	T2.3	1.011627	0.346863	0.084667503
POP Experiment 2	T0h	T2.3	0.1073	0.107296	0.000646805
POP Experiment 2	T0h	T2.3	0.107296	0.107296	0.000646769
POP Experiment 2	T0h	T2.3	0.469879	0.262482	0.020691396
POP Experiment 2	T0h	T2.3	1.342743	0.646149	0.369673106
POP Experiment 2	T0h	T2.3	0.384735	0.096619	0.002584696
POP Experiment 2	T0h	T2.3	0.686798	0.397278	0.068719533
POP Experiment 2	T0h	T2.3	0.922974	0.371277	0.086526592
POP Experiment 2	T0h	T2.3	0.989227	0.442276	0.129326168
POP Experiment 2	T0h	T2.3	0.107298	0.107296	0.000646787
POP Experiment 2	T0h	T2.3	0.47229	0.257996	0.020194392
POP Experiment 2	T0h	T2.3	0.5158	0.43924	0.05597252
POP Experiment 2	T0h	T2.3	1.426941	0.881531	0.691563841
POP Experiment 2	T0h	T2.3	0.593414	0.488647	0.080739388
POP Experiment 2	T0h	T2.3	0.2276	0.151749	0.003201522
POP Experiment 2	T0h	T2.3	1.340683	0.914352	0.680196094
POP Experiment 2	T0h	T2.3	0.107296	0.107292	0.000646733
POP Experiment 2	T0h	T2.3	1.074203	0.327148	0.081128769
POP Experiment 2	T0h	T2.3	1.406265	0.586731	0.327340837
POP Experiment 2	T0h	T2.3	0.321888	0.214592	0.009054766
POP Experiment 2	T0h	T2.3	0.772808	0.570526	0.148948315
POP Experiment 2	T0h	T2.3	0.969498	0.331169	0.074000928
POP Experiment 2	T0h	T2.3	0.383881	0.239929	0.01374019
POP Experiment 2	T0h	T2.3	0.671265	0.478394	0.091994506
POP Experiment 2	T0h	T2.3	0.38385	0.239929	0.013738788
POP Experiment 2	T0h	T2.3	0.379349	0.303467	0.020121462
POP Experiment 2	T0h	T2.3	0.237488	0.135727	0.002781499
POP Experiment 2	T0h	T2.3	0.956238	0.54921	0.183164213
POP Experiment 2	T0h	T2.3	0.53109	0.4552	0.061736515
POP Experiment 2	T0h	T2.3	0.475647	0.339279	0.032777554
POP Experiment 2	T0h	T2.3	0.379333	0.303482	0.020121933
POP Experiment 2	T0h	T2.3	0.303467	0.151733	0.004572782
POP Experiment 2	T0h	T2.3	0.383881	0.239929	0.01374019
POP Experiment 2	T0h	T2.3	0.321899	0.2146	0.009055743
POP Experiment 2	T0h	T2.3	0.813885	0.441284	0.101980125
POP Experiment 2	T0h	T2.3	0.643784	0.643776	0.139704715
POP Experiment 2	T0h	T2.3	0.536484	0.429184	0.056916254
POP Experiment 2	T0h	T2.3	1.072754	0.710571	0.33148021
POP Experiment 2	T0h	T2.3	0.719757	0.336113	0.053921697
POP Experiment 2	T0h	T2.3	0.214592	0.107296	0.001616923
POP Experiment 2	T0h	T2.3	0.1073	0.107296	0.000646805
POP Experiment 2	T0h	T2.3	0.379333	0.303482	0.020121933
POP Experiment 2	T0h	T2.3	0.321888	0.321888	0.017462764
POP Experiment 2	T0h	T2.3	0.438911	0.22583	0.014565253
POP Experiment 2	T0h	T2.3	0.214592	0.214592	0.005174152
POP Experiment 2	T0h	T2.3	0.706615	0.4711	0.09579621
POP Experiment 2	T0h	T2.3	0.718224	0.255127	0.032369132
POP Experiment 2	T0h	T2.3	0.2146	0.1073	0.001617103
POP Experiment 2	T0h	T2.3	0.712463	0.352707	0.058124286
POP Experiment 2	T0h	T2.3	1.056458	0.388062	0.109653013
POP Experiment 2	T0h	T2.3	0.107296	0.107292	0.000646733
POP Experiment 2	T0h	T2.3	0.534515	0.329895	0.036288598
POP Experiment 2	T0h	T2.3	0.470383	0.366821	0.036788657
POP Experiment 2	T0h	T2.3	0.834564	0.42041	0.096396832
POP Experiment 2	T0h	T2.3	0.379349	0.303467	0.020121462
POP Experiment 2	T0h	T2.3	0.672699	0.567261	0.122222961
POP Experiment 2	T0h	T2.3	0.686985	0.253723	0.030458058
POP Experiment 2	T0h	T2.3	0.429199	0.321869	0.026192789
POP Experiment 2	T0h	T2.3	0.834595	0.606964	0.182945125
POP Experiment 2	T0h	T2.3	0.959595	0.676392	0.26379124
POP Experiment 2	T0h	T2.3	0.429199	0.321884	0.026194824
POP Experiment 2	T0h	T2.3	0.556519	0.34314	0.040887579
POP Experiment 2	T0h	T2.3	0.619568	0.296341	0.035919812
POP Experiment 2	T0h	T2.3	0.4552	0.379345	0.037155796
POP Experiment 2	T0h	T2.3	1.246552	0.538864	0.243323705
POP Experiment 2	T0h	T2.3	0.455208	0.379395	0.037164612
POP Experiment 2	T0h	T2.3	0.429199	0.321884	0.026194824
POP Experiment 2	T0h	T2.3	0.686768	0.557239	0.122188237
POP Experiment 2	T0h	T2.3	1.017761	0.47937	0.154847498
POP Experiment 2	T0h	T2.3	0.379356	0.303589	0.020135207
POP Experiment 2	T0h	T2.3	0.1073	0.1073	0.000646841
POP Experiment 2	T0h	T2.3	1.995789	0.684639	0.650715643
POP Experiment 2	T0h	T2.3	0.536499	0.536484	0.080851328
POP Experiment 2	T0h	T2.3	1.458115	0.469604	0.225436604
POP Experiment 2	T0h	T2.3	0.95874	0.479404	0.144213736
POP Experiment 2	T0h	T2.3	0.779533	0.4422	0.097081353
POP Experiment 2	T0h	T2.3	0.675858	0.417725	0.073541876
POP Experiment 2	T0h	T2.3	2.059082	1.307251	2.178788666
POP Experiment 2	T0h	T2.3	1.327087	0.491943	0.221074549
POP Experiment 2	T0h	T2.3	0.214539	0.1073	0.001616552
POP Experiment 2	T0h	T2.3	0.339294	0.135742	0.004255344
POP Experiment 2	T0h	T2.3	0.468536	0.182495	0.010664418
POP Experiment 2	T0h	T2.3	0.366623	0.263016	0.015155914
POP Experiment 2	T0h	T2.3	0.455223	0.303467	0.025609358
POP Experiment 2	T0h	T2.3	0.32189	0.321888	0.017462927
POP Experiment 2	T0h	T2.3	0.429184	0.321888	0.026194146
POP Experiment 2	T0h	T2.3	0.758698	0.455231	0.09878922
POP Experiment 2	T0h	T2.3	1.160248	0.214775	0.03944102
POP Experiment 2	T0h	T2.3	0.686249	0.473511	0.093051354
POP Experiment 2	T0h	T2.3	0.536499	0.429199	0.056921679
POP Experiment 2	T0h	T2.3	0.652832	0.514648	0.100117658
POP Experiment 2	T0h	T2.3	0.214592	0.214592	0.005174152
POP Experiment 2	T0h	T2.3	0.470337	0.366821	0.036783795
POP Experiment 2	T0h	T2.3	0.719727	0.384369	0.068646388
POP Experiment 2	T0h	T2.3	0.625626	0.386353	0.05824739
POP Experiment 2	T0h	T2.3	1.119965	0.442245	0.149392117
POP Experiment 2	T0h	T2.3	0.573801	0.338699	0.041526533
POP Experiment 2	T0h	T2.3	0.855713	0.677734	0.227202044
POP Experiment 2	T0h	T2.3	0.643768	0.321838	0.043644053
POP Experiment 2	T0h	T2.3	0.227631	0.151741	0.003201794
POP Experiment 2	T0h	T2.3	1.392761	0.381298	0.144522865
POP Experiment 2	T0h	T2.3	0.566727	0.336098	0.0403405
POP Experiment 2	T0h	T2.3	0.858337	0.429184	0.10347856
POP Experiment 2	T0h	T2.3	0.60696	0.379333	0.054304858
POP Experiment 2	T0h	T2.3	1.056763	0.534222	0.196955725
POP Experiment 2	T0h	T2.3	0.773193	0.623428	0.172586073
POP Experiment 2	T0h	T2.3	0.533497	0.387329	0.047648305
POP Experiment 2	T0h	T2.3	0.32189	0.214592	0.009054839
POP Experiment 2	T0h	T2.3	0.577698	0.338989	0.041940666
POP Experiment 2	T0h	T2.3	1.008545	0.624237	0.244980651
POP Experiment 2	T0h	T2.3	0.95224	0.505798	0.15745667
POP Experiment 2	T0h	T2.3	0.676331	0.259399	0.031173019
POP Experiment 2	T0h	T2.3	0.577393	0.476303	0.074590243
POP Experiment 2	T0h	T2.3	0.671204	0.478394	0.091983542
POP Experiment 2	T0h	T2.3	0.442383	0.130981	0.005372512
POP Experiment 2	T0h	T2.3	0.1073	0.107296	0.000646805
POP Experiment 2	T0h	T2.3	0.678619	0.170837	0.014250037
POP Experiment 2	T0h	T2.3	0.534485	0.329884	0.036283928
POP Experiment 2	T0h	T2.3	0.652832	0.514748	0.100149632
POP Experiment 2	T0h	T2.3	0.107292	0.107285	0.000646633
POP Experiment 2	T0h	T2.3	0.321884	0.214592	0.009054622
POP Experiment 2	T0h	T2.3	0.107292	0.107285	0.000646633
POP Experiment 2	T0h	T2.3	0.753487	0.225082	0.026995753
POP Experiment 2	T0h	T2.3	0.331406	0.224702	0.010171855
POP Experiment 2	T0h	T2.3	0.680801	0.666557	0.160034287
POP Experiment 2	T0h	T2.3	0.521118	0.38031	0.044796596
POP Experiment 2	T0h	T2.3	0.781067	0.339142	0.060345138
POP Experiment 2	T0h	T2.3	0.214584	0.107296	0.00161685
POP Experiment 2	T0h	T2.3	0.5158	0.439209	0.055966185
POP Experiment 2	T0h	T2.3	0.773254	0.439758	0.095182016
POP Experiment 2	T0h	T2.3	0.237513	0.135742	0.002782403
POP Experiment 2	T0h	T2.3	0.716949	0.299461	0.043465646
POP Experiment 2	T0h	T2.3	0.107296	0.107296	0.000646769
POP Experiment 2	T0h	T2.3	0.780579	0.678589	0.200499436
POP Experiment 2	T0h	T2.3	1.213867	0.759949	0.435691467
POP Experiment 2	T0h	T2.3	0.709818	0.607224	0.146942275
POP Experiment 2	T0h	T2.3	0.455231	0.379395	0.037167212
POP Experiment 2	T0h	T2.3	1.120209	0.647736	0.29798681
POP Experiment 2	T0h	T2.3	0.214592	0.214592	0.005174152
POP Experiment 2	T0h	T2.3	0.719517	0.574341	0.136811
POP Experiment 2	T0h	T2.3	1.763977	1.146729	1.427039246
POP Experiment 2	T0h	T2.3	0.605652	0.312775	0.038524126
POP Experiment 2	T0h	T2.3	0.452583	0.253046	0.018518812
POP Experiment 2	T0h	T2.3	0.757973	0.388916	0.074643551
POP Experiment 2	T0h	T2.3	0.958496	0.380981	0.094789447
POP Experiment 2	T0h	T2.3	0.531128	0.4552	0.061742699
POP Experiment 2	T0h	T2.3	1.911041	0.625557	0.523258619
POP Experiment 2	T0h	T2.3	1.240356	0.693298	0.381005639
POP Experiment 2	T0h	T2.3	0.868011	0.648327	0.215208991
POP Experiment 2	T0h	T2.3	0.711021	0.339264	0.054052771
POP Experiment 2	T0h	T2.3	0.677708	0.442245	0.081457605
POP Experiment 2	T0h	T2.3	1.120071	0.280457	0.063418725
POP Experiment 2	T0h	T2.3	0.625244	0.476786	0.083256197
POP Experiment 2	T0h	T2.3	1.183502	0.546387	0.234793719
POP Experiment 2	T0h	T2.3	1.010376	0.905182	0.456029223
POP Experiment 2	T0h	T2.3	0.333984	0.137329	0.004268939
POP Experiment 2	T0h	T2.3	0.569946	0.422668	0.06020094
POP Experiment 2	T0h	T2.3	0.1073	0.107296	0.000646805
POP Experiment 2	T0h	T2.3	0.237488	0.101791	0.001656518
POP Experiment 2	T0h	T2.3	1.012161	0.630249	0.250225068
POP Experiment 2	T0h	T2.3	0.850006	0.547485	0.157142174
POP Experiment 2	T0h	T2.3	0.515808	0.439209	0.055967397
POP Experiment 2	T0h	T2.3	1.072601	0.349792	0.091869041
POP Experiment 2	T0h	T2.3	0.383667	0.242798	0.014016571
POP Experiment 2	T0h	T2.3	0.107296	0.107296	0.000646769
POP Experiment 2	T0h	T2.3	0.470383	0.366829	0.036789979
POP Experiment 2	T0h	T2.3	0.769623	0.46096	0.102795875
POP Experiment 2	T0h	T2.3	2.20932	0.589722	0.549760475
POP Experiment 2	T0h	T2.3	0.47039	0.366831	0.03679105
POP Experiment 2	T0h	T2.3	1.224976	1.197906	0.930559122
POP Experiment 2	T0h	T2.3	1.457443	0.742325	0.523677487
POP Experiment 2	T0h	T2.3	0.957977	0.577637	0.200588544
POP Experiment 2	T0h	T2.3	0.864319	0.769073	0.28242359
POP Experiment 2	T0h	T2.3	0.386742	0.124268	0.004188219
POP Experiment 2	T0h	T2.3	0.985107	0.466644	0.141875868
POP Experiment 2	T0h	T2.3	0.910437	0.455261	0.123501241
POP Experiment 2	T0h	T2.3	0.337738	0.128662	0.003833475
POP Experiment 2	T0h	T2.3	0.716827	0.273743	0.036817841
POP Experiment 2	T0h	T2.3	0.441742	0.070923	0.001651754
POP Experiment 2	T0h	T2.3	0.92247	0.772034	0.311362442
POP Experiment 2	T0h	T2.3	1.193054	0.592651	0.274619131
POP Experiment 2	T0h	T2.3	0.214594	0.107296	0.001616941
POP Experiment 2	T0h	T2.3	0.470383	0.366827	0.036789649
POP Experiment 2	T0h	T2.3	0.570053	0.422729	0.060230482
POP Experiment 2	T0h	T2.3	0.4552	0.303482	0.025609864
POP Experiment 2	T0h	T2.3	0.546875	0.229553	0.019466315
POP Experiment 2	T0h	T2.3	0.303497	0.2276	0.009261142
POP Experiment 2	T0h	T2.3	0.71521	0.376038	0.065509644
POP Experiment 2	T0h	T2.3	0.429199	0.429184	0.041395388
POP Experiment 2	T0h	T2.3	0.66917	0.457138	0.08482018
POP Experiment 2	T0h	T2.3	0.452587	0.253052	0.01851979
POP Experiment 2	T0h	T2.3	0.107296	0.107292	0.000646733
POP Experiment 2	T0h	T2.3	0.321899	0.107269	0.002585955
POP Experiment 2	T0h	T2.3	0.837875	0.335968	0.064350797
POP Experiment 2	T0h	T2.3	0.570648	0.184235	0.013575428
POP Experiment 2	T0h	T2.3	0.644897	0.431396	0.073242822
POP Experiment 2	T0h	T2.3	0.470398	0.366852	0.036795368
POP Experiment 2	T0h	T2.3	0.237488	0.135712	0.002780957
POP Experiment 2	T0h	T2.3	0.970947	0.542999	0.182930482
POP Experiment 2	T0h	T2.3	1.010239	0.479614	0.153631519
POP Experiment 2	T0h	T2.3	1.798584	1.059509	1.274358262
POP Experiment 2	T0h	T2.3	0.214592	0.214584	0.005173863
POP Experiment 2	T0h	T2.3	0.321888	0.214569	0.009053103
POP Experiment 2	T0h	T2.3	0.469849	0.262512	0.020693961
POP Experiment 2	T0h	T2.3	0.536499	0.429199	0.056921679
POP Experiment 2	T0h	T2.3	0.624266	0.43335	0.070768862
POP Experiment 2	T0h	T2.3	0.429186	0.429184	0.041393507
POP Experiment 2	T0h	T2.3	0.383865	0.239922	0.01373877
POP Experiment 2	T0h	T2.3	0.303497	0.151742	0.004573813
POP Experiment 2	T0h	T2.3	0.534512	0.329895	0.036288342
POP Experiment 2	T0h	T2.3	0.107296	0.107292	0.000646733
POP Experiment 2	T0h	T2.3	0.339127	0.238495	0.01159848
POP Experiment 2	T0h	T2.3	0.429184	0.429184	0.041393218
POP Experiment 2	T0h	T2.3	1.126465	0.89801	0.523871925
POP Experiment 2	T0h	T2.3	0.455231	0.379349	0.037159933
POP Experiment 2	T0h	T2.3	1.674805	0.442879	0.235260982
POP Experiment 2	T0h	T2.3	0.837955	0.332825	0.063250526
POP Experiment 2	T0h	T2.3	1.934311	0.249329	0.090383494
POP Experiment 2	T0h	T2.3	1.00293	0.39856	0.108551249
POP Experiment 2	T0h	T2.3	1.191254	0.26054	0.058880024
POP Experiment 2	T0h	T2.3	0.570053	0.422729	0.060230482
POP Experiment 2	T0h	T2.3	0.986328	0.455261	0.135855055
POP Experiment 2	T0h	T2.3	0.781128	0.235443	0.03059135
POP Experiment 2	T0h	T2.3	0.864136	0.304993	0.055704892
POP Experiment 2	T0h	T2.3	0.685242	0.460754	0.088646158
POP Experiment 2	T0h	T2.3	0.1073	0.107296	0.000646805
POP Experiment 2	T0h	T2.3	1.062195	0.4552	0.148168558
POP Experiment 2	T0h	T2.3	0.339294	0.135712	0.004253607
POP Experiment 2	T0h	T2.3	0.425293	0.22699	0.014148539
POP Experiment 2	T0h	T2.3	0.1073	0.1073	0.000646841
POP Experiment 2	T0h	T2.3	0.527466	0.240936	0.020386862
POP Experiment 2	T0h	T2.3	0.452591	0.253044	0.018518955
POP Experiment 2	T0h	T2.3	0.339294	0.135712	0.004253607
POP Experiment 2	T0h	T2.3	0.765564	0.398621	0.078958962
POP Experiment 2	T0h	T2.3	0.762817	0.621109	0.16839491
POP Experiment 2	T0h	T2.3	0.711975	0.474655	0.097986212
POP Experiment 2	T0h	T2.3	0.677612	0.235321	0.026059286
POP Experiment 2	T0h	T2.3	0.303467	0.075897	0.00125848
POP Experiment 2	T0h	T2.3	0.455215	0.379333	0.037155593
POP Experiment 2	T0h	T2.3	0.44173	0.145943	0.006575669
POP Experiment 2	T0h	T2.3	0.455215	0.303467	0.025608779
POP Experiment 2	T0h	T2.3	0.435242	0.337524	0.028876458
POP Experiment 2	T0h	T2.3	0.625122	0.417603	0.066555319
POP Experiment 2	T0h	T2.3	0.928764	0.674301	0.25140175
POP Experiment 2	T0h	T2.3	0.436569	0.133478	0.005486304
POP Experiment 2	T0h	T2.3	0.455221	0.379333	0.037156271
POP Experiment 2	T0h	T2.3	0.643799	0.53648	0.105105167
POP Experiment 2	T0h	T2.3	0.227615	0.151733	0.003201215
POP Experiment 2	T0h	T2.3	0.915619	0.30661	0.060058578
POP Experiment 2	T0h	T2.3	0.577599	0.339142	0.041964984
POP Experiment 2	T0h	T2.3	0.383698	0.24292	0.014030212
POP Experiment 2	T0h	T2.3	1.01738	0.916725	0.469817366
POP Experiment 2	T0h	T2.3	0.321899	0.214584	0.009054586
POP Experiment 2	T0h	T2.3	0.64904	0.33415	0.047149582
POP Experiment 2	T0h	T2.3	0.366638	0.263	0.015155175
POP Experiment 2	T0h	T2.3	0.334045	0.137329	0.004269842
POP Experiment 2	T0h	T2.3	1.304932	0.485159	0.211341588
POP Experiment 2	T0h	T2.3	0.567444	0.477112	0.073016899
POP Experiment 2	T0h	T2.3	1.407829	0.561281	0.302045298
POP Experiment 2	T0h	T2.3	0.532227	0.337273	0.037505782
POP Experiment 2	T0h	T2.3	0.47039	0.366821	0.036789396
POP Experiment 2	T0h	T2.3	0.879822	0.257088	0.041223315
POP Experiment 2	T0h	T2.3	0.987823	0.176636	0.022763446
POP Experiment 2	T0h	T2.3	0.2276	0.151733	0.003200944
POP Experiment 2	T0h	T2.3	0.237511	0.135742	0.002782375
POP Experiment 2	T0h	T2.3	0.455231	0.303528	0.025618762
POP Experiment 2	T0h	T2.3	0.662445	0.479004	0.090603206
POP Experiment 2	T0h	T2.3	0.816681	0.53125	0.141773362
POP Experiment 2	T0h	T2.3	0.71817	0.22345	0.025242078
POP Experiment 2	T0h	T2.3	0.575775	0.335876	0.041095462
POP Experiment 2	T0h	T2.3	0.214592	0.214592	0.005174152
POP Experiment 2	T0h	T2.3	0.455215	0.379364	0.037160498
POP Experiment 2	T0h	T2.3	0.238953	0.09127	0.001364312
POP Experiment 2	T0h	T2.3	0.237503	0.135712	0.002781174
POP Experiment 2	T0h	T2.3	0.303467	0.151733	0.004572782
POP Experiment 2	T0h	T2.3	0.321888	0.321884	0.017462438
POP Experiment 2	T0h	T2.3	0.429184	0.1073	0.003557483
POP Experiment 2	T0h	T2.3	0.238953	0.09127	0.001364312
POP Experiment 2	T0h	T2.3	0.227615	0.151733	0.003201215
POP Experiment 2	T0h	T2.3	0.214478	0.1073	0.001616
POP Experiment 2	T0h	T2.3	0.321899	0.214584	0.009054586
POP Experiment 2	T0h	T2.3	0.214592	0.107296	0.001616923
POP Experiment 2	T0h	T2.3	0.643768	0.1073	0.005497862
POP Experiment 2	T0h	T2.3	0.386688	0.175018	0.007899336
POP Experiment 2	T0h	T2.3	0.652161	0.346344	0.050564688
POP Experiment 2	T0h	T2.3	1.119162	0.647644	0.297567358
POP Experiment 2	T0h	T2.3	0.534378	0.295471	0.029887816
POP Experiment 2	T0h	T2.3	0.975952	0.35672	0.085654186
POP Experiment 2	T0h	T2.3	0.643799	0.2146	0.020698888
POP Experiment 2	T0h	T2.3	0.2276	0.151733	0.003200944
POP Experiment 2	T0h	T2.3	0.214592	0.107292	0.001616814
POP Experiment 2	T0h	T2.3	0.383911	0.23992	0.013740651
POP Experiment 2	T0h	T2.3	0.1073	0.107296	0.000646805
POP Experiment 2	T0h	T2.3	0.771057	0.479431	0.110346512
POP Experiment 2	T0h	T2.3	0.678253	0.577576	0.127262661
POP Experiment 2	T0h	T2.3	0.107296	0.107296	0.000646769
POP Experiment 2	T0h	T2.3	0.339119	0.238495	0.011598123
POP Experiment 2	T0h	T2.3	0.383911	0.239868	0.013735479
POP Experiment 2	T0h	T2.3	0.717529	0.537537	0.122171899
POP Experiment 2	T0h	T2.3	0.521082	0.38028	0.044786576
POP Experiment 2	T0h	T2.3	0.575684	0.370331	0.048712376
POP Experiment 2	T0h	T2.3	0.99939	0.8479	0.404716484
POP Experiment 2	T0h	T2.3	0.652657	0.247101	0.027348571
POP Experiment 2	T0h	T2.3	0.678587	0.170746	0.014234822
POP Experiment 2	T0h	T2.3	0.531082	0.455231	0.06174194
POP Experiment 2	T0h	T2.3	0.837975	0.414978	0.094628127
POP Experiment 2	T0h	T2.3	0.884033	0.544922	0.163809214
POP Experiment 2	T0h	T2.3	0.1073	0.107296	0.000646805
POP Experiment 2	T0h	T2.3	0.719513	0.574356	0.136815814
POP Experiment 2	T0h	T2.3	0.751099	0.321899	0.052393771
POP Experiment 2	T0h	T2.3	0.569201	0.359222	0.045551964
POP Experiment 2	T0h	T2.3	0.321892	0.321888	0.017463089
POP Experiment 2	T0h	T2.3	0.383881	0.239929	0.01374019
POP Experiment 2	T0h	T2.3	0.470398	0.366821	0.036790242
POP Experiment 2	T0h	T2.3	0.1073	0.107292	0.000646769
POP Experiment 2	T0h	T2.3	0.718109	0.478752	0.100543431
POP Experiment 2	T0h	T2.3	0.772705	0.386353	0.075490243
POP Experiment 2	T0h	T2.3	0.321888	0.321884	0.017462438
POP Experiment 2	T0h	T2.3	1.160431	0.535095	0.220847426
POP Experiment 2	T0h	T2.3	0.429184	0.321884	0.026193603
POP Experiment 2	T0h	T2.3	1.160576	0.653992	0.316630217
POP Experiment 2	T0h	T2.3	0.535095	0.172882	0.011208136
POP Experiment 2	T0h	T2.3	0.239868	0.050629	0.000448929
POP Experiment 2	T0h	T2.3	0.303528	0.151733	0.004573885
POP Experiment 2	T0h	T2.3	0.576813	0.37323	0.049495811
POP Experiment 2	T0h	T2.3	0.837769	0.322998	0.059823757
POP Experiment 2	T0h	T2.3	0.339111	0.238525	0.011600236
POP Experiment 2	T0h	T2.3	0.772339	0.718262	0.21593166
POP Experiment 2	T0h	T2.3	0.321888	0.214592	0.009054766
POP Experiment 2	T0h	T2.3	0.469894	0.262482	0.020692207
POP Experiment 2	T0h	T2.3	1.072815	0.385864	0.110412817
POP Experiment 2	T0h	T2.3	1.193359	0.370728	0.115477228
POP Experiment 2	Control	Control 1	0.780722	0.576385	0.153578636
POP Experiment 2	Control	Control 1	1.394852	0.420959	0.174602854
POP Experiment 2	Control	Control 1	0.303482	0.227609	0.009261142
POP Experiment 2	Control	Control 1	1.072723	0.789795	0.396563703
POP Experiment 2	Control	Control 1	1.078316	0.768555	0.381400107
POP Experiment 2	Control	Control 1	0.675446	0.620972	0.141873769
POP Experiment 2	Control	Control 1	0.1073	0.107292	0.000646769
POP Experiment 2	Control	Control 1	0.981667	0.671402	0.268316733
POP Experiment 2	Control	Control 1	0.429184	0.429184	0.041393218
POP Experiment 2	Control	Control 1	0.227631	0.151733	0.003201504
POP Experiment 2	Control	Control 1	1.294434	0.761322	0.473735034
POP Experiment 2	Control	Control 1	0.536499	0.429199	0.056921679
POP Experiment 2	Control	Control 1	0.455231	0.455231	0.049396265
POP Experiment 2	Control	Control 1	1.238295	1.218964	0.970915023
POP Experiment 2	Control	Control 1	0.773193	0.623444	0.172593304
POP Experiment 2	Control	Control 1	0.534512	0.329895	0.036288342
POP Experiment 2	Control	Control 1	0.379349	0.303482	0.02012309
POP Experiment 2	Control	Control 1	0.408386	0.25824	0.016881277
POP Experiment 2	Control	Control 1	0.719666	0.239899	0.028914979
POP Experiment 2	Control	Control 1	0.237549	0.135742	0.002782924
POP Experiment 2	Control	Control 1	0.706665	0.545563	0.122682425
POP Experiment 2	Control	Control 1	0.965637	0.751068	0.316902079
POP Experiment 2	Control	Control 1	0.438948	0.319571	0.026663516
POP Experiment 2	Control	Control 1	0.366577	0.263	0.015151861
POP Experiment 2	Control	Control 1	1.307663	0.499668	0.223758388
POP Experiment 2	Control	Control 1	0.531097	0.455223	0.061742645
POP Experiment 2	Control	Control 1	1.053009	0.728485	0.337685944
POP Experiment 2	Control	Control 1	1.003983	0.914673	0.459362917
POP Experiment 2	Control	Control 1	1.313568	0.897461	0.641706485
POP Experiment 2	Control	Control 1	0.321892	0.321892	0.017463415
POP Experiment 2	Control	Control 1	0.762806	0.548615	0.137089457
POP Experiment 2	Control	Control 1	0.53109	0.455219	0.061740638
POP Experiment 2	Control	Control 1	0.751099	0.750977	0.221811648
POP Experiment 2	Control	Control 1	0.717529	0.537537	0.122171899
POP Experiment 2	Control	Control 1	1.012222	0.568909	0.209101249
POP Experiment 2	Control	Control 1	1.048401	0.916504	0.490104595
POP Experiment 2	Control	Control 1	0.791656	0.758644	0.243541571
POP Experiment 2	Control	Control 1	0.429199	0.321884	0.026194824
POP Experiment 2	Control	Control 1	0.676636	0.468384	0.089685326
POP Experiment 2	Control	Control 1	0.2146	0.214592	0.005174442
POP Experiment 2	Control	Control 1	0.759033	0.758362	0.228667438
POP Experiment 2	Control	Control 1	0.663147	0.544922	0.112295039
POP Experiment 2	Control	Control 1	0.643776	0.53648	0.105099968
POP Experiment 2	Control	Control 1	0.751076	0.643776	0.174628941
POP Experiment 2	Control	Control 1	0.880341	0.779419	0.296072388
POP Experiment 2	Control	Control 1	0.2146	0.107296	0.001616995
POP Experiment 2	Control	Control 1	0.643799	0.643776	0.139709598
POP Experiment 2	Control	Control 1	0.659241	0.454163	0.082271931
POP Experiment 2	Control	Control 1	0.910431	0.531128	0.162488366
POP Experiment 2	Control	Control 1	1.077435	0.560982	0.220086236
POP Experiment 2	Control	Control 1	1.220612	0.652277	0.335224397
POP Experiment 2	Control	Control 1	0.107296	0.107296	0.000646769
POP Experiment 2	Control	Control 1	1.156147	0.787415	0.435188108
POP Experiment 2	Control	Control 1	1.252991	0.781128	0.475680257
POP Experiment 2	Control	Control 1	1.48938	0.575153	0.33714627
POP Experiment 2	Control	Control 1	0.715515	0.402393	0.073935632
POP Experiment 2	Control	Control 1	0.429188	0.429184	0.041393797
POP Experiment 2	Control	Control 1	0.772827	0.570526	0.148953172
POP Experiment 2	Control	Control 1	0.986717	0.668327	0.267995748
POP Experiment 2	Control	Control 1	0.717529	0.537537	0.122171899
POP Experiment 2	Control	Control 1	0.536438	0.449783	0.061412541
POP Experiment 2	Control	Control 1	0.2146	0.1073	0.001617103
POP Experiment 2	Control	Control 1	0.67178	0.623779	0.141753038
POP Experiment 2	Control	Control 1	1.152679	0.572182	0.247349773
POP Experiment 2	Control	Control 1	0.96497	0.445145	0.127085514
POP Experiment 2	Control	Control 1	1.053497	0.668243	0.291359189
POP Experiment 2	Control	Control 1	0.973934	0.656914	0.255877673
POP Experiment 2	Control	Control 1	0.98632	0.758667	0.331551908
POP Experiment 2	Control	Control 1	0.577728	0.437347	0.064889034
POP Experiment 2	Control	Control 1	0.455231	0.379395	0.037167212
POP Experiment 2	Control	Control 1	0.758698	0.606934	0.1609717
POP Experiment 2	Control	Control 1	0.983932	0.800797	0.361121803
POP Experiment 2	Control	Control 1	0.863564	0.549438	0.161325515
POP Experiment 2	Control	Control 1	0.680801	0.666565	0.160037198
POP Experiment 2	Control	Control 1	0.858368	0.643776	0.209553167
POP Experiment 2	Control	Control 1	0.919769	0.82753	0.346332391
POP Experiment 2	Control	Control 1	0.55899	0.545654	0.088183482
POP Experiment 2	Control	Control 1	0.567337	0.441727	0.064379106
POP Experiment 2	Control	Control 1	0.812775	0.710266	0.228228168
POP Experiment 2	Control	Control 1	0.781128	0.574768	0.152963333
POP Experiment 2	Control	Control 1	0.91032	0.525818	0.159615876
POP Experiment 2	Control	Control 1	0.916443	0.909485	0.398419613
POP Experiment 2	Control	Control 1	0.756256	0.651733	0.179815643
POP Experiment 2	Control	Control 1	0.709808	0.607224	0.146939379
POP Experiment 2	Control	Control 1	0.214592	0.214592	0.005174152
POP Experiment 2	Control	Control 1	0.719177	0.631042	0.15913981
POP Experiment 2	Control	Control 1	1.326782	0.752563	0.478584558
POP Experiment 2	Control	Control 1	0.883881	0.339172	0.069644192
POP Experiment 2	Control	Control 1	0.379333	0.303474	0.020121065
POP Experiment 2	Control	Control 1	0.606964	0.531128	0.095252695
POP Experiment 2	Control	Control 1	0.214592	0.107296	0.001616923
POP Experiment 2	Control	Control 1	0.593399	0.488647	0.080736575
POP Experiment 2	Control	Control 1	0.959396	0.769897	0.327163192
POP Experiment 2	Control	Control 1	0.815201	0.673752	0.210569739
POP Experiment 2	Control	Control 1	0.536499	0.429199	0.056921679
POP Experiment 2	Control	Control 1	0.534424	0.295454	0.02988792
POP Experiment 2	Control	Control 1	0.837952	0.301819	0.052753851
POP Experiment 2	Control	Control 1	0.681519	0.575165	0.127259789
POP Experiment 2	Control	Control 1	0.762695	0.479361	0.108809377
POP Experiment 2	Control	Control 1	0.429199	0.429199	0.041397558
POP Experiment 2	Control	Control 1	0.912867	0.866089	0.367720872
POP Experiment 2	Control	Control 1	0.709839	0.607239	0.146954169
POP Experiment 2	Control	Control 1	0.1073	0.1073	0.000646841
POP Experiment 2	Control	Control 1	1.147339	0.778931	0.42301113
POP Experiment 2	Control	Control 1	1.07135	0.631042	0.269284223
POP Experiment 2	Control	Control 1	1.221466	0.734436	0.413750496
POP Experiment 2	Control	Control 1	0.625229	0.476788	0.083254098
POP Experiment 2	Control	Control 1	0.214592	0.214592	0.005174152
POP Experiment 2	Control	Control 1	0.686256	0.473434	0.093026844
POP Experiment 2	Control	Control 1	0.916626	0.638245	0.225196642
POP Experiment 2	Control	Control 1	0.684174	0.578049	0.128983679
POP Experiment 2	Control	Control 1	1.221191	1.033142	0.735047788
POP Experiment 2	Control	Control 1	0.751068	0.53648	0.129352902
POP Experiment 2	Control	Control 1	0.852966	0.633942	0.202529591
POP Experiment 2	Control	Control 1	0.719666	0.479782	0.101195941
POP Experiment 2	Control	Control 1	1.249527	0.572754	0.272748094
POP Experiment 2	Control	Control 1	0.470387	0.366852	0.036794206
POP Experiment 2	Control	Control 1	0.682861	0.455231	0.086445823
POP Experiment 2	Control	Control 1	0.577332	0.476318	0.074583181
POP Experiment 2	Control	Control 1	0.767059	0.672455	0.192815545
POP Experiment 2	Control	Control 1	1.290909	1.141846	0.932151434
POP Experiment 2	Control	Control 1	0.717529	0.537537	0.122171899
POP Experiment 2	Control	Control 1	0.533478	0.38736	0.047652475
POP Experiment 2	Control	Control 1	0.606934	0.379364	0.054309628
POP Experiment 2	Control	Control 1	1.221008	0.800766	0.480494759
POP Experiment 2	Control	Control 1	0.693787	0.56778	0.127742225
POP Experiment 2	Control	Control 1	0.92244	0.47629	0.136063717
POP Experiment 2	Control	Control 1	0.624165	0.479828	0.083943503
POP Experiment 2	Control	Control 1	0.379364	0.303467	0.020122547
POP Experiment 2	Control	Control 1	1.454285	0.860107	0.67839476
POP Experiment 2	Control	Control 1	1.002319	0.860653	0.416213378
POP Experiment 2	Control	Control 1	0.339111	0.238525	0.011600236
POP Experiment 2	Control	Control 1	0.1073	0.1073	0.000646841
POP Experiment 2	Control	Control 1	0.772919	0.533752	0.133133422
POP Experiment 2	Control	Control 1	0.815987	0.641327	0.194535047
POP Experiment 2	Control	Control 1	0.831665	0.567261	0.16239834
POP Experiment 2	Control	Control 1	0.1073	0.107292	0.000646769
POP Experiment 2	Control	Control 1	0.214592	0.1073	0.001617031
POP Experiment 2	Control	Control 1	0.986328	0.758698	0.331577949
POP Experiment 2	Control	Control 1	1.301889	0.700601	0.411857624
POP Experiment 2	Control	Control 1	1.008026	0.768112	0.348457869
POP Experiment 2	Control	Control 1	1.309586	0.884399	0.623391644
POP Experiment 2	Control	Control 1	0.909821	0.780426	0.310779361
POP Experiment 2	Control	Control 1	0.862976	0.719696	0.253472012
POP Experiment 2	Control	Control 1	1.113129	0.921082	0.537126143
POP Experiment 2	Control	Control 1	1.1922	0.842644	0.508216093
POP Experiment 2	Control	Control 1	0.339127	0.238495	0.01159848
POP Experiment 2	Control	Control 1	0.837997	0.763306	0.267038568
POP Experiment 2	Control	Control 1	0.676758	0.531189	0.110737071
POP Experiment 2	Control	Control 1	0.536499	0.536484	0.080851328
POP Experiment 2	Control	Control 1	0.758705	0.6828	0.194472097
POP Experiment 2	Control	Control 1	1.045799	0.781128	0.376389853
POP Experiment 2	Control	Control 1	1.072113	0.627747	0.267055498
POP Experiment 2	Control	Control 1	0.606934	0.531128	0.095246048
POP Experiment 2	Control	Control 1	0.965668	0.85837	0.393239333
POP Experiment 2	Control	Control 1	0.75708	0.651917	0.180171761
POP Experiment 2	Control	Control 1	0.986298	0.758698	0.331564386
POP Experiment 2	Control	Control 1	0.858368	0.751074	0.269380441
POP Experiment 2	Control	Control 1	0.582413	0.458817	0.071007751
POP Experiment 2	Control	Control 1	0.812759	0.710297	0.228237656
POP Experiment 2	Control	Control 1	1.494202	1.182617	1.208284917
POP Experiment 2	Control	Control 1	0.965668	0.965668	0.471500484
POP Experiment 2	Control	Control 1	0.858368	0.751068	0.269377023
POP Experiment 2	Control	Control 1	1.657288	0.844055	0.769891835
POP Experiment 2	Control	Control 1	1.111237	0.958687	0.57146588
POP Experiment 2	Control	Control 1	0.829803	0.569092	0.162819537
POP Experiment 2	Control	Control 1	1.14386	1.050934	0.688357951
POP Experiment 2	Control	Control 1	1.326904	0.699142	0.419934044
POP Experiment 2	Control	Control 1	1.368652	1.012085	0.829668888
POP Experiment 2	Control	Control 1	1.023041	0.81134	0.389095852
POP Experiment 2	Control	Control 1	0.379356	0.303467	0.020121969
POP Experiment 2	Control	Control 1	2.019104	1.065004	1.482424131
POP Experiment 2	Control	Control 1	0.703819	0.573101	0.132278058
POP Experiment 2	Control	Control 1	1.011993	0.832458	0.39977026
POP Experiment 2	Control	Control 1	1.396988	0.653687	0.395710335
POP Experiment 2	Control	Control 1	1.243195	0.696117	0.384833193
POP Experiment 2	Control	Control 1	0.858368	0.536476	0.153605656
POP Experiment 2	Control	Control 1	0.758698	0.531067	0.128845546
POP Experiment 2	Control	Control 1	0.769836	0.390671	0.076670635
POP Experiment 2	Control	Control 2	0.577575684	0.239559174	0.022433802
POP Experiment 2	Control	Control 2	0.643798828	0.643737793	0.139697104
POP Experiment 2	Control	Control 2	0.914718628	0.616104126	0.211475007
POP Experiment 2	Control	Control 2	1.11845398	0.641845703	0.292659299
POP Experiment 2	Control	Control 2	0.816375732	0.624755859	0.186424309
POP Experiment 2	Control	Control 2	1.05533981	0.639450073	0.270466284
POP Experiment 2	Control	Control 2	0.455200195	0.379333496	0.037153998
POP Experiment 2	Control	Control 2	0.676544189	0.442382813	0.081322437
POP Experiment 2	Control	Control 2	0.21459198	0.21459198	0.005174151
POP Experiment 2	Control	Control 2	0.643737793	0.536468506	0.105087694
POP Experiment 2	Control	Control 2	0.321889877	0.32188797	0.017462914
POP Experiment 2	Control	Control 2	0.884216309	0.54523468	0.164015723
POP Experiment 2	Control	Control 2	3.7957077	0.285919189	0.237588444
POP Experiment 2	Control	Control 2	0.470367432	0.366851807	0.036792105
POP Experiment 2	Control	Control 2	0.442367554	0.130981445	0.005372339
POP Experiment 2	Control	Control 2	0.455215454	0.227600098	0.01543382
POP Experiment 2	Control	Control 2	0.454589844	0.159851074	0.008053725
POP Experiment 2	Control	Control 2	0.439453125	0.238628387	0.016096387
POP Experiment 2	Control	Control 2	0.42918396	0.42918396	0.041393207
POP Experiment 2	Control	Control 2	0.533966064	0.237609863	0.020165255
POP Experiment 2	Control	Control 2	0.650168419	0.436222076	0.075438146
POP Experiment 2	Control	Control 2	0.810058594	0.545532227	0.146838072
POP Experiment 2	Control	Control 2	0.606994629	0.531097412	0.095250768
POP Experiment 2	Control	Control 2	0.764831543	0.434326172	0.091865597
POP Experiment 2	Control	Control 2	0.606506348	0.441894531	0.070426603
POP Experiment 2	Control	Control 2	0.577384949	0.476287842	0.074584961
POP Experiment 2	Control	Control 2	0.107299805	0.10729599	0.000646803
POP Experiment 2	Control	Control 2	0.531097412	0.455230713	0.061744386
POP Experiment 2	Control	Control 2	1.52575684	1.10858154	1.116013048
POP Experiment 2	Control	Control 2	0.440979004	0.246826172	0.017163587
POP Experiment 2	Control	Control 2	0.303527832	0.151733398	0.004573903
POP Experiment 2	Control	Control 2	0.536499023	0.42918396	0.056918418
POP Experiment 2	Control	Control 2	0.379364014	0.303466797	0.020122526
POP Experiment 2	Control	Control 2	0.959411621	0.536037445	0.176190457
POP Experiment 2	Control	Control 2	0.678222656	0.479217529	0.09351692
POP Experiment 2	Control	Control 2	0.321899414	0.214599609	0.00905573
POP Experiment 2	Control	Control 2	0.302185059	0.082519531	0.001469021
POP Experiment 2	Control	Control 2	0.917724609	0.775081635	0.31110719
POP Experiment 2	Control	Control 2	0.53647995	0.321884155	0.034924794
POP Experiment 2	Control	Control 2	0.470336914	0.366882324	0.036793925
POP Experiment 2	Control	Control 2	1.13665771	0.534790039	0.215278546
POP Experiment 2	Control	Control 2	0.42918396	0.321891785	0.026194656
POP Experiment 2	Control	Control 2	0.811035156	0.545131683	0.146881613
POP Experiment 2	Control	Control 2	0.544372559	0.341239929	0.039383085
POP Experiment 2	Control	Control 2	0.515869141	0.439208984	0.055976657
POP Experiment 2	Control	Control 2	0.570053101	0.422729492	0.060230613
POP Experiment 2	Control	Control 2	0.386413574	0.127105713	0.004365513
POP Experiment 2	Control	Control 2	0.21459198	0.21459198	0.005174151
POP Experiment 2	Control	Control 2	0.657592773	0.344299316	0.050538589
POP Experiment 2	Control	Control 2	0.53647995	0.42918396	0.056915659
POP Experiment 2	Control	Control 2	2.6542511	0.141052246	0.040740828
POP Experiment 2	Control	Control 2	0.42918396	0.321884155	0.026193621
POP Experiment 2	Control	Control 2	1.2959137	0.587341309	0.29806863
POP Experiment 2	Control	Control 2	0.570007324	0.255561829	0.024869235
POP Experiment 2	Control	Control 2	0.238952637	0.091274261	0.001364428
POP Experiment 2	Control	Control 2	0.214599609	0.107299805	0.001617095
POP Experiment 2	Control	Control 2	0.834564209	0.758666992	0.262949783
POP Experiment 2	Control	Control 2	0.33404541	0.137298584	0.004268107
POP Experiment 2	Control	Control 2	0.916656494	0.621704102	0.215358428
POP Experiment 2	Control	Control 2	0.303466797	0.151741028	0.004573214
POP Experiment 2	Control	Control 2	0.429199219	0.321899414	0.026196932
POP Experiment 2	Control	Control 2	0.10729599	0.107292175	0.000646734
POP Experiment 2	Control	Control 2	0.682830811	0.455200195	0.086430882
POP Experiment 2	Control	Control 2	0.544674158	0.339141846	0.038990708
POP Experiment 2	Control	Control 2	0.455215454	0.303478956	0.025610541
POP Experiment 2	Control	Control 2	0.836700439	0.494628906	0.129093528
POP Experiment 2	Control	Control 2	0.107297897	0.10729599	0.000646786
POP Experiment 2	Control	Control 2	0.835754395	0.385951996	0.082725536
POP Experiment 2	Control	Control 2	0.709815979	0.607227325	0.146942978
POP Experiment 2	Control	Control 2	0.475585938	0.339294434	0.03277455
POP Experiment 2	Control	Control 2	0.64377594	0.53647995	0.105099938
POP Experiment 2	Control	Control 2	0.659179688	0.454086304	0.082238357
POP Experiment 2	Control	Control 2	0.834594727	0.758666992	0.262963579
POP Experiment 2	Control	Control 2	0.686279297	0.473419189	0.093025994
POP Experiment 2	Control	Control 2	0.477058411	0.339111328	0.032877688
POP Experiment 2	Control	Control 2	1.05450439	0.629425049	0.262832088
POP Experiment 2	Control	Control 2	0.920845032	0.330352783	0.069489741
POP Experiment 2	Control	Control 2	0.442359924	0.233505249	0.015610266
POP Experiment 2	Control	Control 2	0.21459198	0.10729599	0.001616922
POP Experiment 2	Control	Control 2	0.593414307	0.488647461	0.08073957
POP Experiment 2	Control	Control 2	0.479827881	0.431861877	0.049198958
POP Experiment 2	Control	Control 2	0.10729599	0.10729599	0.000646769
POP Experiment 2	Control	Control 2	0.524841309	0.337141037	0.036821033
POP Experiment 2	Control	Control 2	0.524841309	0.337142944	0.036821393
POP Experiment 2	Control	Control 2	0.66293335	0.515869141	0.102619549
POP Experiment 2	Control	Control 2	0.570068359	0.422668457	0.060218217
POP Experiment 2	Control	Control 2	0.531085968	0.455200195	0.061735901
POP Experiment 2	Control	Control 2	0.577384949	0.476318359	0.074592707
POP Experiment 2	Control	Control 2	0.531066895	0.455219269	0.061736936
POP Experiment 2	Control	Control 2	0.622802734	0.484191895	0.084958653
POP Experiment 2	Control	Control 2	0.455200195	0.379348755	0.037156412
POP Experiment 2	Control	Control 2	0.719520569	0.57434082	0.136811854
POP Experiment 2	Control	Control 2	0.21459198	0.21459198	0.005174151
POP Experiment 2	Control	Control 2	0.969703674	0.658508301	0.255499453
POP Experiment 2	Control	Control 2	0.321899414	0.214599609	0.00905573
POP Experiment 2	Control	Control 2	0.32188797	0.321884155	0.017462449
POP Experiment 2	Control	Control 2	0.869743347	0.253005981	0.039486332
POP Experiment 2	Control	Control 2	0.624206543	0.479827881	0.08395098
POP Experiment 2	Control	Control 2	0.769126892	0.544647217	0.136894454
POP Experiment 2	Control	Control 2	0.874099731	0.676513672	0.233139977
POP Experiment 2	Control	Control 2	0.541898727	0.434638977	0.058905872
POP Experiment 2	Control	Control 2	0.321891785	0.107299805	0.002587282
POP Experiment 2	Control	Control 2	0.679641724	0.440185547	0.081099453
POP Experiment 2	Control	Control 2	1.63409424	0.696044922	0.533503149
POP Experiment 2	Control	Control 2	1.91918945	0.57510376	0.448742687
POP Experiment 2	Control	Control 2	0.988586426	0.46105957	0.139392168
POP Experiment 2	Control	Control 2	0.624267578	0.433349609	0.070768986
POP Experiment 2	Control	Control 2	0.303478241	0.227630615	0.009262455
POP Experiment 2	Control	Control 2	0.21459198	0.10729599	0.001616922
POP Experiment 2	Control	Control 2	0.534729004	0.241210938	0.020761124
POP Experiment 2	Control	Control 2	0.536499023	0.429199219	0.05692173
POP Experiment 2	Control	Control 2	0.331420898	0.22467041	0.010170003
POP Experiment 2	Control	Control 2	0.625305176	0.328491211	0.043714504
POP Experiment 2	Control	Control 2	0.42918396	0.321889877	0.026194397
POP Experiment 2	Control	Control 2	0.32188797	0.32188797	0.017462759
POP Experiment 2	Control	Control 2	0.470397949	0.366828918	0.036791546
POP Experiment 2	Control	Control 2	0.42918396	0.42918396	0.041393207
POP Experiment 2	Control	Control 2	1.27952576	0.809127808	0.519238151
POP Experiment 2	Control	Control 2	0.544373035	0.3412323	0.0393816
POP Experiment 2	Control	Control 2	0.321899414	0.214599609	0.00905573
POP Experiment 2	Control	Control 2	0.766143799	0.530029297	0.130061692
POP Experiment 2	Control	Control 2	0.455223083	0.227600098	0.01543413
POP Experiment 2	Control	Control 2	1.66194153	0.673027039	0.511437683
POP Experiment 2	Control	Control 2	0.42918396	0.42918396	0.041393207
POP Experiment 2	Control	Control 2	0.985366821	0.7109375	0.297084054
POP Experiment 2	Control	Control 2	0.659179688	0.454101563	0.08224306
POP Experiment 2	Control	Control 2	4.07865906	0.324707031	0.328783555
POP Experiment 2	Control	Control 2	2.55038452	0.580200195	0.623163977
POP Experiment 2	Control	Control 2	0.57736969	0.476318359	0.074589988
POP Experiment 2	Control	Control 2	0.686256409	0.473449707	0.093032167
POP Experiment 2	Control	Control 2	0.813789368	0.668334961	0.207335582
POP Experiment 2	Control	Control 2	1.04983521	0.625610352	0.258611486
POP Experiment 2	Control	Control 2	0.901641846	0.603675842	0.200472074
[truncated: 22,585 more rows]
