# Supplementary material for: Biophysical and physiological processes causing oxygen loss from coral reefs
Source: eLife. 2019 Dec 3;8:e49114. doi: 10.7554/eLife.49114 (PMC6890468; doi:10.7554/eLife.49114)
Supplement: Figure 4—source data 1. [file elife-49114-fig4-data1.csv]

Experiment	Sample	Organism	Functional	Calcification	Area (cm2)	Area error (cm2)	Temperature ©	Volume (L)	Volume Error (L)	Incubation time (d)	Incubation time error (d)	T0h dO2 (mg/L)	T0h dO2 error (mg/L)	dO2 in bottle T0h (umols)	dO2 in bottle T0h error(umols)	Tfinal dO2 (mg/L)	dO2 in Bottle Tfinal (umol)	dO2 in Bottle Tfinal error (umol)	Delta dO2 (umols)	Delta dO2 error (umols)	Delta O2 corrected for controls (umols)	Delta O2 corrected for controls (umols)	Delta dO2 per area per time (umol/cm2/d)	Delta dO2 per area per time error (umol/cm2/d)		Volume of gas (mL)	Volume of gas error (mL)	Concentration of O2 in gas (%)	Concentration of O2 in gas error (%)	Concentration of O2 in gas (mg/ml)	Concentration of O2 in gas error (mg/ml)	Total gas O2 produced (mg)	Total gas O2 produced error (mg)	Total gas O2 produced (umols)	Total gas O2 produced error (umols)	Delta gas O2 per area per time (umol/cm2/d)	Delta gas O2 per area per time error (umol/cm2/d)	Total O2 gas and dissolved (umol)	Fraction of O2 in gas (%)	df/dy, where y is Total gaseous O2 produced in umol	df/dx, where x is total dissolved gas produced in umol
1	Control A	Control	Control	Control	95.03	0.01	23.40	1.50	0.00	4.00	0.01	7.00	0.10	328.13	4.69	5.50	257.81	4.69	-70.31	6.63			-0.18	0.017		0	0.1	0	0.1	0.000	0.001	0.00	0.00	0.00	0.00	0.00	0.00	-70.31	0.00	0.00	0.00	0.00
1	Control B	Control	Control	Control	95.03	0.01	23.40	1.50	0.00	4.00	0.01	7.00	0.10	328.13	4.69	4.90	229.69	4.69	-98.44	6.63			-0.26	0.017		0	0.1	0	0.1	0.000	0.001	0.00	0.00	0.00	0.00	0.00	0.00	-98.44	0.00	0.00	0.00	0.00
1	Control C	Control	Control	Control	95.03	0.01	23.40	1.50	0.00	4.00	0.01	7.00	0.10	328.13	4.69	5.00	234.38	4.69	-93.75	6.63			-0.25	0.017		0	0.1	0	0.1	0.000	0.001	0.00	0.00	0.00	0.00	0.00	0.00	-93.75	0.00	0.00	0.00	0.00
1	Montipora D	Montipora sp.	Coral	Calcifying	36.30	0.01	23.40	1.50	0.00	4.00	0.01	7.00	0.10	328.13	4.69	12.00	562.50	4.69	234.38	6.63	321.88	9.38	2.22	0.065		3	0.1	30.5	0.1	0.393	0.001	1.18	0.04	36.89	1.23	0.25	0.00	358.76	10.28	0.32	-0.05	0.51
1	Montipora E	Montipora sp.	Coral	Calcifying	34.70	0.01	23.40	1.50	0.00	4.00	0.01	7.00	0.10	328.13	4.69	14.50	679.69	4.69	351.56	6.63	439.06	9.38	3.16	0.068		4	0.1	38.5	0.1	0.497	0.001	1.99	0.05	62.08	1.55	0.45	0.00	501.14	12.39	0.21	-0.04	0.40
1	Montipora F	Montipora sp.	Coral	Calcifying	32.40	0.01	23.40	1.50	0.00	4.00	0.01	7.00	0.10	328.13	4.69	17.80	834.38	4.69	506.25	6.63	593.75	9.38	4.58	0.072		4	0.1	43.2	0.1	0.557	0.001	2.23	0.06	69.66	1.74	0.54	0.00	663.41	10.50	0.15	-0.02	0.30
1	Chaetomorpha G	Chaetomorpha sp.	Macroalgae	Fleshy	32.20	0.01	23.40	1.50	0.00	4.00	0.01	7.00	0.10	328.13	4.69	16.80	787.50	4.69	459.38	6.63	546.88	9.38	4.25	0.073		13	0.1	48	0.1	0.619	0.001	8.05	0.06	251.55	1.94	1.95	0.02	798.43	31.51	0.09	-0.05	0.37
1	Chaetomorpha H	Chaetomorpha sp.	Macroalgae	Fleshy	36.50	0.01	23.40	1.50	0.00	4.00	0.01	7.00	0.10	328.13	4.69	12.30	576.56	4.69	248.44	6.63	335.94	9.38	2.30	0.064		15	0.1	44.6	0.1	0.575	0.001	8.63	0.06	269.69	1.80	1.85	0.01	605.63	44.53	0.09	-0.10	0.69
1	Chaetomorpha I	Chaetomorpha sp.	Macroalgae	Fleshy	33.90	0.01	23.40	1.50	0.00	4.00	0.01	7.00	0.10	328.13	4.69	14.10	660.94	4.69	332.81	6.63	420.31	9.38	3.10	0.069		10	0.1	48.2	0.1	0.622	0.001	6.22	0.06	194.31	1.94	1.43	0.01	614.62	31.61	0.12	-0.07	0.52
2	Control 1	Control	Control	Control	95.03	0.01	28.20	1.50	0.00	2.00	0.01	7.64	0.10	358.13	4.69	7.98	374.06	4.69	15.94	6.63			0.08	0.035		0	0.1	0	0.1	0.000	0.001	0.00	0.00	0.00	0.00	0.00	0.00	15.94	0.00	0.00	0.00	0.00
2	Control 2	Control	Control	Control	95.03	0.01	27.40	1.50	0.00	2.00	0.01	7.64	0.10	358.13	4.69	7.87	368.91	4.69	10.78	6.63			0.06	0.035		0	0.1	0	0.1	0.000	0.001	0.00	0.00	0.00	0.00	0.00	0.00	10.78	0.00	0.00	0.00	0.00
2	Control 3	Control	Control	Control	95.03	0.01	27.30	1.50	0.00	2.00	0.01	7.64	0.10	358.13	4.69	7.76	363.75	4.69	5.63	6.63			0.03	0.035		0	0.1	0	0.1	0.000	0.001	0.00	0.00	0.00	0.00	0.00	0.00	5.63	0.00	0.00	0.00	0.00
2	Control 4	Control	Control	Control	95.03	0.01	27.30	1.50	0.00	2.00	0.01	7.64	0.10	358.13	4.69	7.80	365.63	4.69	7.50	6.63			0.04	0.035		0	0.1	0	0.1	0.000	0.001	0.00	0.00	0.00	0.00	0.00	0.00	7.50	0.00	0.00	0.00	0.00
2	Control 5	Control	Control	Control	95.03	0.01	27.40	1.50	0.00	2.00	0.01	7.64	0.10	358.13	4.69	7.81	366.09	4.69	7.97	6.63			0.04	0.035		0	0.1	0	0.1	0.000	0.001	0.00	0.00	0.00	0.00	0.00	0.00	7.97	0.00	0.00	0.00	0.00
2	CCA 6	CCA	CCA	Calcifying	59.52	0.01	27.40	1.50	0.00	2.00	0.01	7.64	0.10	358.13	4.69	20.00	937.50	4.69	579.38	6.63	569.81	9.38	4.79	0.079		5	0.1	44.4	0.1	0.573	0.001	2.86	0.06	89.49	1.79	0.75	0.01	659.31	13.57	0.13	-0.02	0.27
2	CCA 7	CCA	CCA	Calcifying	39.06	0.01	27.20	1.50	0.00	2.00	0.01	7.64	0.10	358.13	4.69	20.00	937.50	4.69	579.38	6.63	569.81	9.38	7.29	0.120		4	0.1	42.7	0.1	0.551	0.001	2.20	0.06	68.85	1.72	0.88	0.01	638.67	10.78	0.14	-0.02	0.26
2	CCA 8	CCA	CCA	Calcifying	36.03	0.01	27.30	1.50	0.00	2.00	0.01	7.64	0.10	358.13	4.69	20.00	937.50	4.69	579.38	6.63	569.81	9.38	7.91	0.130		2	0.1	45	0.1	0.581	0.001	1.16	0.06	36.28	1.81	0.50	0.01	606.09	5.99	0.15	-0.01	0.28
2	CCA 9	CCA	CCA	Calcifying	38.53	0.01	27.30	1.50	0.00	2.00	0.01	7.64	0.10	358.13	4.69	20.00	937.50	4.69	579.38	6.63	569.81	9.38	7.39	0.122		3.5	0.1	53.6	0.1	0.691	0.001	2.42	0.07	75.63	2.16	0.98	0.01	645.44	11.72	0.14	-0.02	0.31
2	CCA 10	CCA	CCA	Calcifying	39.95	0.01	27.10	1.50	0.00	2.00	0.01	7.64	0.10	358.13	4.69	20.00	937.50	4.69	579.38	6.63	569.81	9.38	7.13	0.117		3	0.1	46.1	0.1	0.595	0.001	1.78	0.06	55.75	1.86	0.70	0.01	625.56	8.91	0.14	-0.01	0.28
2	Orbicella 11	Orbicella sp.	Coral	Calcifying	18.05	0.01	26.90	1.50	0.00	2.00	0.01	7.64	0.10	358.13	4.69	14.78	692.81	4.69	334.69	6.63	325.13	9.38	9.01	0.260		0	0.1	0	0.1	0.000	0.001	0.00	0.00	0.00	0.00	0.00	0.00	325.13	0.00	0.00	0.00	0.00
2	Orbicella 12	Orbicella sp.	Coral	Calcifying	14.48	0.01	27.10	1.50	0.00	2.00	0.01	7.64	0.10	358.13	4.69	13.81	647.34	4.69	289.22	6.63	279.66	9.38	9.66	0.324		0	0.1	0	0.1	0.000	0.001	0.00	0.00	0.00	0.00	0.00	0.00	279.66	0.00	0.00	0.00	0.00
2	Orbicella 13	Orbicella sp.	Coral	Calcifying	7.96	0.01	26.90	1.50	0.00	2.00	0.01	7.64	0.10	358.13	4.69	10.42	488.44	4.69	130.31	6.63	120.75	9.38	7.58	0.589		0	0.1	0	0.1	0.000	0.001	0.00	0.00	0.00	0.00	0.00	0.00	120.75	0.00	0.00	0.00	0.00
2	Orbicella 14	Orbicella sp.	Coral	Calcifying	11.53	0.01	27.00	1.50	0.00	2.00	0.01	8.09	0.10	379.22	4.69	10.93	512.34	4.69	133.13	6.63	123.56	9.38	5.36	0.406		0	0.1	0	0.1	0.000	0.001	0.00	0.00	0.00	0.00	0.00	0.00	123.56	0.00	0.00	0.00	0.00
2	Orbicella 15	Orbicella sp.	Coral	Calcifying	16.37	0.01	26.80	1.50	0.00	2.00	0.01	8.09	0.10	379.22	4.69	12.66	593.44	4.69	214.22	6.63	204.66	9.38	6.25	0.286		1	0.1	37.4	0.1	0.482	0.001	0.48	0.05	15.08	1.51	0.46	0.01	219.73	6.86	0.41	-0.03	0.64
2	Chaetomorpha 16	Chaetomorpha sp.	Macroalgae	Fleshy	49.49	0.01	26.80	1.50	0.00	2.00	0.01	8.09	0.10	379.22	4.69	20.00	937.50	4.69	558.28	6.63	548.72	9.38	5.54	0.095		15	0.1	61.7	0.1	0.796	0.001	11.94	0.08	373.09	2.49	3.77	0.04	921.81	40.47	0.06	-0.04	0.33
2	Chaetomorpha 17	Chaetomorpha sp.	Macroalgae	Fleshy	49.94	0.01	26.80	1.50	0.00	2.00	0.01	8.09	0.10	379.22	4.69	20.00	937.50	4.69	558.28	6.63	548.72	9.38	5.49	0.094		17	0.1	62.2	0.1	0.802	0.001	13.64	0.08	426.26	2.51	4.27	0.04	974.98	43.72	0.06	-0.04	0.33
2	Chaetomorpha 18	Chaetomorpha sp.	Macroalgae	Fleshy	39.99	0.01	26.70	1.50	0.00	2.00	0.01	8.09	0.10	379.22	4.69	20.00	937.50	4.69	558.28	6.63	548.72	9.38	6.86	0.117		11	0.1	60.8	0.1	0.784	0.001	8.63	0.08	269.61	2.45	3.37	0.04	818.33	32.95	0.08	-0.04	0.33
2	Chaetomorpha 19	Chaetomorpha sp.	Macroalgae	Fleshy	56.71	0.01	27.80	1.50	0.00	2.00	0.01	8.09	0.10	379.22	4.69	20.00	937.50	4.69	558.28	6.63	548.72	9.38	4.84	0.083		20	0.1	65.8	0.1	0.849	0.001	16.98	0.08	530.51	2.65	4.68	0.04	1079.23	49.16	0.05	-0.04	0.32
2	Chaetomorpha 20	Chaetomorpha sp.	Macroalgae	Fleshy	27.88	0.01	26.80	1.50	0.00	2.00	0.01	8.09	0.10	379.22	4.69	20.00	937.50	4.69	558.28	6.63	548.72	9.38	9.84	0.168		8	0.1	55.9	0.1	0.721	0.001	5.77	0.07	180.28	2.25	3.23	0.06	729.00	24.73	0.10	-0.03	0.32
2	Turf 21	Turf	Turf	Fleshy	26.29	0.01	26.70	1.50	0.00	2.00	0.01	8.09	0.10	379.22	4.69	18.62	872.81	4.69	493.59	6.63	484.03	9.38	9.21	0.178		5	0.1	45.9	0.1	0.592	0.001	2.96	0.06	92.52	1.85	1.76	0.03	576.55	16.05	0.14	-0.03	0.32
2	Turf 22	Turf	Turf	Fleshy	42.60	0.01	26.70	1.50	0.00	2.00	0.01	8.09	0.10	379.22	4.69	15.83	742.03	4.69	362.81	6.63	353.25	9.38	4.15	0.110		3	0.1	42.7	0.1	0.551	0.001	1.65	0.06	51.64	1.72	0.61	0.01	404.89	12.75	0.21	-0.03	0.41
2	Turf 23	Turf	Turf	Fleshy	33.45	0.01	26.90	1.50	0.00	2.00	0.01	8.09	0.10	379.22	4.69	19.42	910.31	4.69	531.09	6.63	521.53	9.38	7.80	0.140		4	0.1	48.2	0.1	0.622	0.001	2.49	0.06	77.72	1.94	1.16	0.02	599.25	12.97	0.14	-0.02	0.31
2	Turf 24	Turf	Turf	Fleshy	24.49	0.01	26.70	1.50	0.00	2.00	0.01	8.09	0.10	379.22	4.69	15.64	733.13	4.69	353.91	6.63	344.34	9.38	7.03	0.191		3	0.1	45.9	0.1	0.592	0.001	1.78	0.06	55.51	1.85	1.13	0.02	399.85	13.88	0.21	-0.03	0.45
2	Turf 25	Turf	Turf	Fleshy	23.85	0.01	26.70	1.50	0.00	2.00	0.01	8.09	0.10	379.22	4.69	16.00	750.00	4.69	370.78	6.63	361.22	9.38	7.57	0.197		3	0.1	45.675	0.1	0.589	0.001	1.77	0.06	55.24	1.84	1.16	0.02	416.46	13.26	0.20	-0.03	0.43
